# Supplementary material
Source: bioRxiv or medRxiv preprint supplement (https://www.biorxiv.org/highwire/filestream/12162/field_highwire_adjunct_files/0/044990-1.pdf)
Supplement: Supplementary file [file 044990-1.pdf]

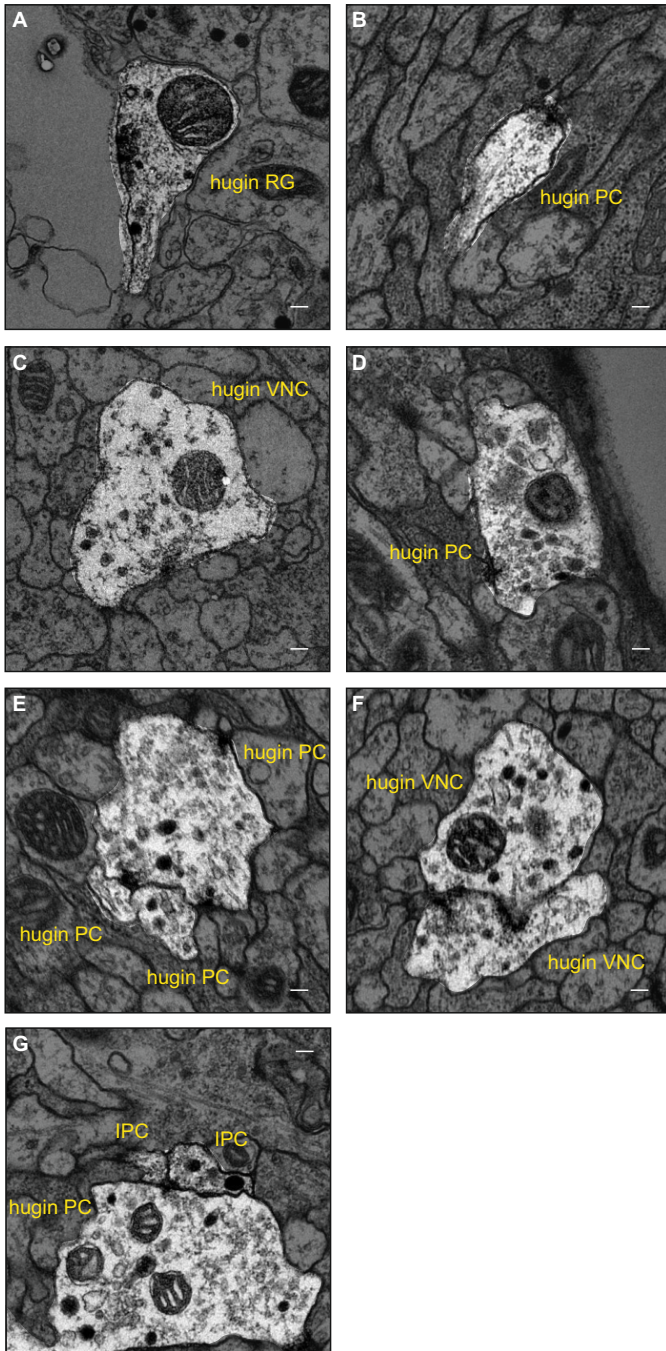

**Figure S1. Examples of synaptic sites in the ssTEM volume.** **A**, Presynaptic density of a hugin-RG neuron bordering haemal space within the ring gland. **B,C**, Examples of presynaptic sites with small clear core vesicles for a hugin-PC and hugin-VNC neuron. **D**, Example of a presynaptic site with close-by dense core vesicles. **E,F**, Examples of synaptic connections between hugin neurons. **G,H**, Examples of synaptic connections from hugin-PC neurons onto insulin-producing cells (IPCs). Scale bars represent 100nm.

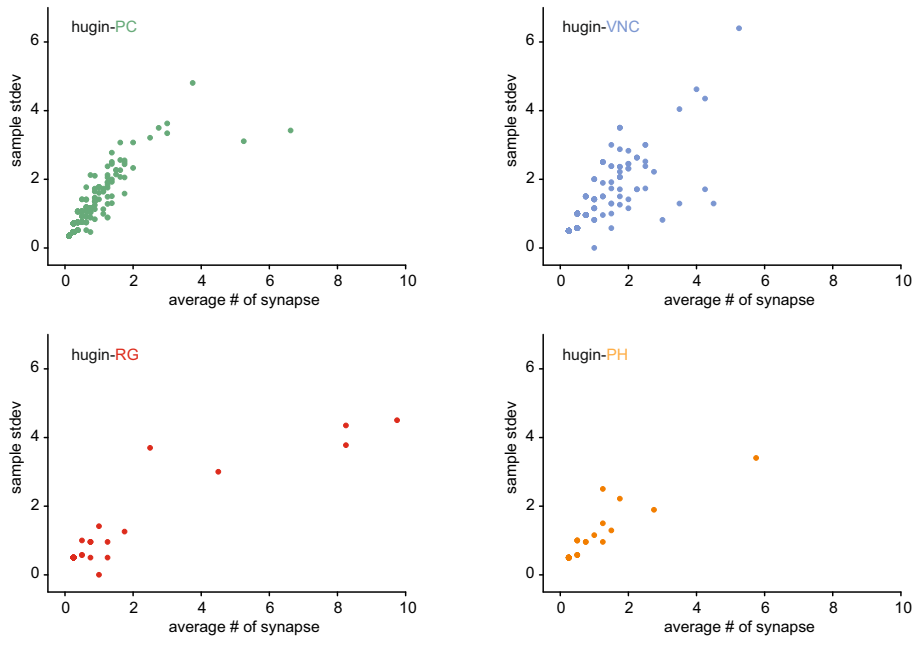

**Figure S2.** Number of synapses constituting connections to/from a shared partners varies within each hugin class. Each data point represents a pre- or postsynaptic partner of neurons of given hugin class. Most of these partners connect to all hugin neurons of a single class but these connections vary in the number of synaptic contacts they constitute. Plotted is the average number of synapses over all hugin neurons of that class against the standard deviation.

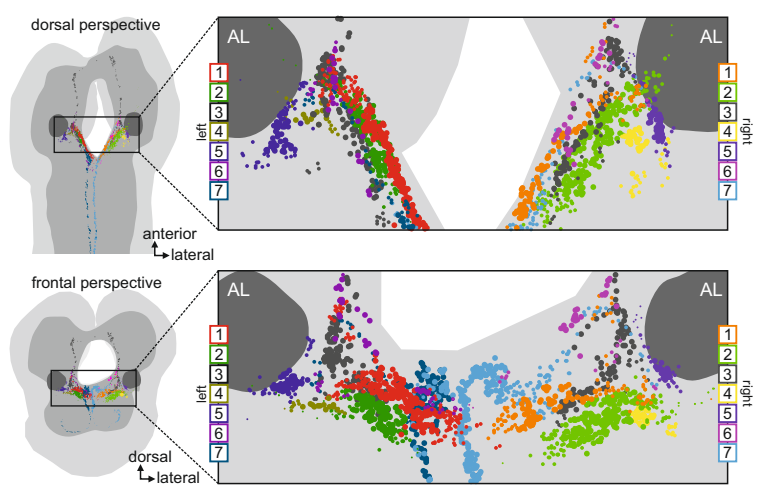

**Figure S3.** Clustered synapses of sensory inputs to hugin neurons cover discrete parts of the subesophageal zone. Distribution of synaptic sites of afferent neurons as clustered in Fig ???. Each dot indicates a synaptic site. Dot size decreases with distance to its cluster's center. Note, that the sensory neurons presynaptic to hugin neurons innervate areas medial and ventral to the antennal lobes.

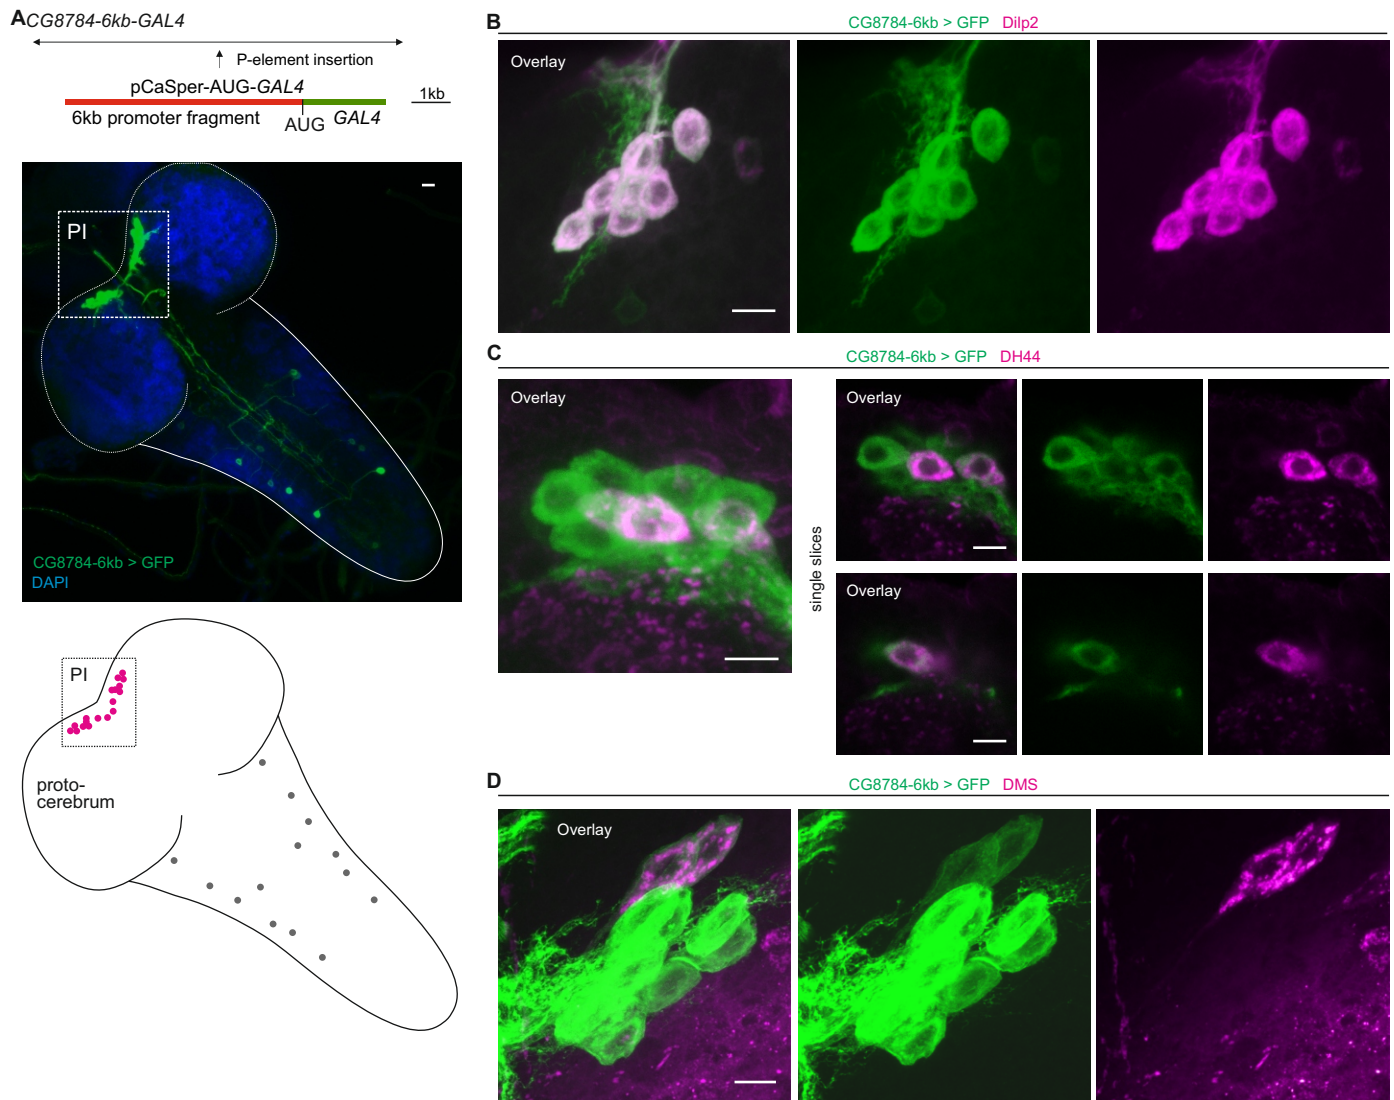

**Figure S4. Hugin receptor line *CG8784-6kb-GAL4* drives expression in medial neurosecretory cells (mNSCs) of the pars intercerebralis (PI) similar to *CG8784-GAL4:p65*.** **A**, Immunolabeling and semi-schematic representation of hugin receptor *CG8784-6kb-GAL4* expression pattern. In comparison with the *CG8784-GAL4:p65* BAC line (Fig. ??A,B), this line shows a more restricted expression. However, the same prominent cluster of neurons (magenta) of the PI is labeled but only few additional cells in the ventral nerve cord (grey circles). **B-D**, Double staining of *CG8784-6kb-GAL4* driving GFP expression suggests expression of *CG8784* in (B) *Drosophila* insulin-like peptide- (Dilp2), (C) diuretic hormone 44- (DH44) and (D) Dromyosuppressin-producing (DMS) mNSCs of the PI. Scale bars represent 10 $\mu$ m (A) and 5 $\mu$ m (B-D).

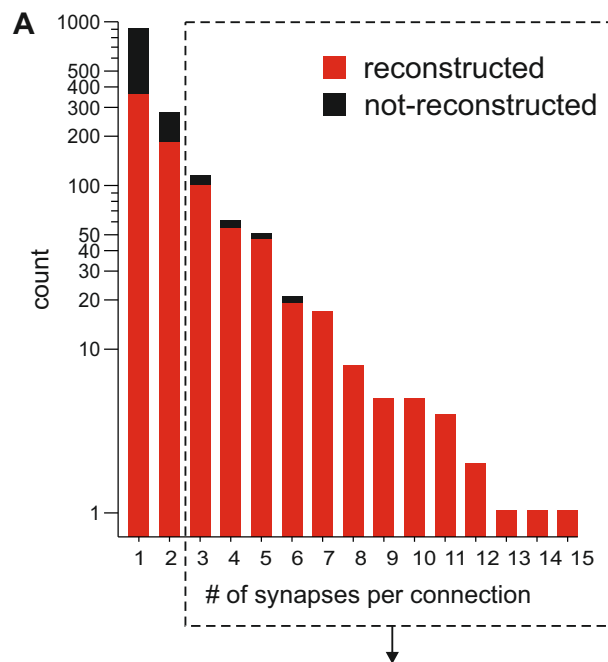

**B**

|         |       | % reconstructed |             |
|---------|-------|-----------------|-------------|
|         |       | postsynaptic    | presynaptic |
| left    | hugin |                 |             |
|         | PC 1  | 100             | 95          |
|         | PC 2  | 100             | 95          |
|         | PC 3  | 100             | 100         |
| right   | PC 1  | 97              | 88          |
|         | PC 2  | 89              | 99          |
|         | PC 3  | 93              | 94          |
|         | PC 4  | 98              | 94          |
| left    | VNC 1 | 83              | 96          |
|         | VNC 2 | 88              | 100         |
| right   | VNC 1 | 72              | 99          |
|         | VNC 2 | 76              | 97          |
| left    | RG 1  | -               | 100         |
|         | RG 2  | -               | 100         |
| right   | RG 1  | -               | 100         |
|         | RG 2  | -               | 100         |
| left    | PH 1  | -               | 90          |
|         | PH 2  | -               | 95          |
| right   | PH 1  | -               | 100         |
|         | PH 2  | -               | 76          |
| average |       | 90              | 96          |

**Figure S5. Neurons connected by more than two synapses to hugin neurons were reliably reconstructed.** **A**, Distribution of synaptic connections to/from hugin neurons. X-axis gives number of synapse per connection and y-axis occurrence. Reconstruction of the pre- or postsynaptic neuron was attempted for every hugin synapse. Red fraction was completely reconstructed, black fraction was not successfully reconstructed due to either errors/ambiguity in the ssTEM data set (e.g. missing sections) or failure to find a matching pair of neurons in both hemisegments. The fraction of unaccounted synapses strongly decreases from 2 to 3 synapses per connection. We therefore subsequently applied a threshold of at least a single more-than-two-synapses connection (did not apply to sensory neurons). **B**, Completeness of reconstruction of pre- and postsynaptic partners for each hugin neuron. Values in the table give the percentages of pre- and postsynaptic sites that connect to a above-threshold partner of hugin neurons which was successfully reconstructed.



**Supplementary neuron atlas. Morphology and connectivity of reconstructed neurons.** Reconstructions of **(A)** hugin-PC, **(B)** hugin-VNC, **(C)** hugin-RG, **(D)** hugin-PH neurons, **(E)** insulin-producing cells (IPCs), **(F)** DH44-producing cells, **(G)** DMS-producing cells, **(H)** antennal nerve (AN) sensory neurons, **(I)** abdominal nerve sensory neurons, **(J)** paired interneurons and **(K)** unpaired medial interneurons. A dorsal view of each cell is shown on the left, and a frontal view on the right. Outline of the nervous system and the ring gland are shown in grey and dark grey, respectively. Number in the table is the number of synapses of given neurons onto (left) and from (right) the hugin neuron indicated in the row. Neurons are displayed as corresponding pairs of the left/right hemisegment with the exception of afferent neurons and unpaired medial interneurons.

# A hugin-PC

1.

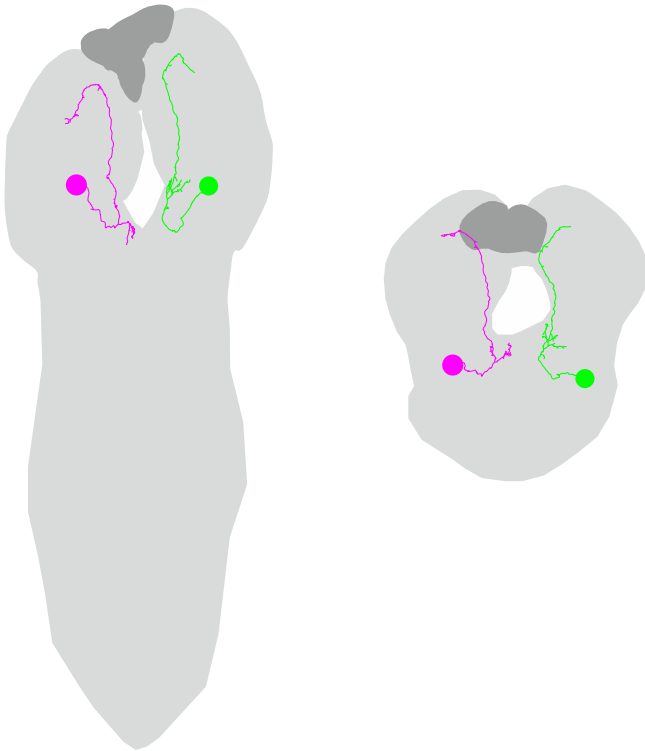

|                   | synapses to |   | synapses from |   |
|-------------------|-------------|---|---------------|---|
| hugin-PC right 1  | 8           | 0 | 4             | 0 |
| hugin-PC right 2  | 0           | 0 | 0             | 0 |
| hugin-PC right 3  | 2           | 0 | 5             | 0 |
| hugin-PC right 4  | 1           | 0 | 3             | 0 |
| hugin-PC left 1   | 0           | 3 | 0             | 4 |
| hugin-PC left 2   | 0           | 0 | 0             | 0 |
| hugin-PC left 3   | 0           | 2 | 0             | 4 |
| hugin-PC left 4   | 0           | 2 | 0             | 3 |
| hugin-RG right 1  | 0           | 0 | 0             | 0 |
| hugin-RG right 2  | 0           | 0 | 0             | 0 |
| hugin-RG left 1   | 0           | 0 | 0             | 0 |
| hugin-RG left 2   | 0           | 0 | 0             | 0 |
| hugin-VNC right 1 | 0           | 1 | 0             | 0 |
| hugin-VNC right 2 | 0           | 0 | 0             | 0 |
| hugin-VNC left 1  | 0           | 0 | 0             | 0 |
| hugin-VNC left 2  | 0           | 0 | 0             | 0 |
| hugin-PH right 1  | 0           | 0 | 0             | 0 |
| hugin-PH right 2  | 0           | 0 | 0             | 0 |
| hugin-PH left 1   | 0           | 0 | 0             | 0 |
| hugin-PH left 2   | 0           | 0 | 0             | 0 |

2.

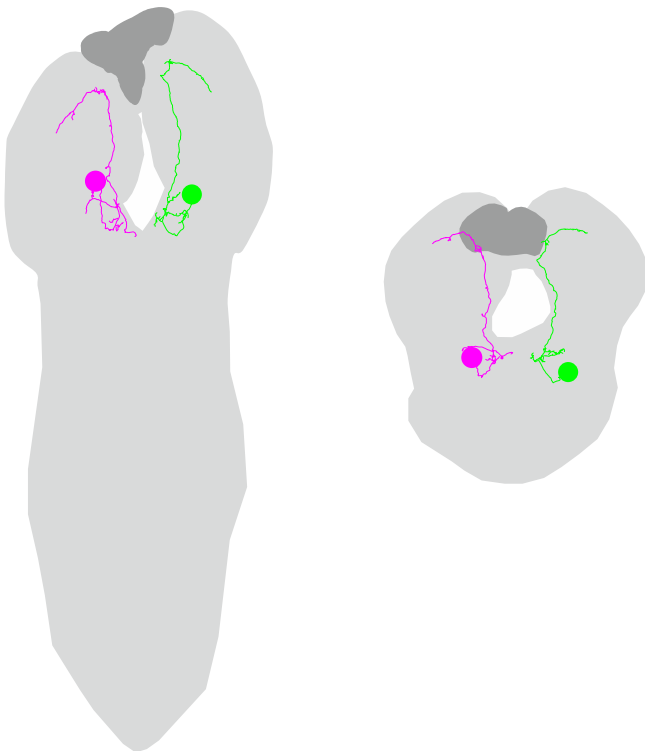

|                   | synapses to |   | synapses from |   |
|-------------------|-------------|---|---------------|---|
| hugin-PC right 1  | 0           | 0 | 0             | 0 |
| hugin-PC right 2  | 4           | 0 | 8             | 0 |
| hugin-PC right 3  | 0           | 0 | 3             | 0 |
| hugin-PC right 4  | 3           | 0 | 5             | 0 |
| hugin-PC left 1   | 0           | 0 | 0             | 0 |
| hugin-PC left 2   | 0           | 4 | 0             | 3 |
| hugin-PC left 3   | 0           | 5 | 0             | 3 |
| hugin-PC left 4   | 0           | 5 | 0             | 7 |
| hugin-RG right 1  | 0           | 0 | 0             | 0 |
| hugin-RG right 2  | 0           | 0 | 0             | 0 |
| hugin-RG left 1   | 0           | 0 | 0             | 0 |
| hugin-RG left 2   | 0           | 1 | 0             | 0 |
| hugin-VNC right 1 | 0           | 0 | 0             | 0 |
| hugin-VNC right 2 | 0           | 2 | 0             | 0 |
| hugin-VNC left 1  | 0           | 0 | 0             | 0 |
| hugin-VNC left 2  | 0           | 0 | 0             | 0 |
| hugin-PH right 1  | 0           | 0 | 0             | 0 |
| hugin-PH right 2  | 0           | 0 | 0             | 0 |
| hugin-PH left 1   | 0           | 0 | 0             | 0 |
| hugin-PH left 2   | 0           | 0 | 0             | 0 |

3.

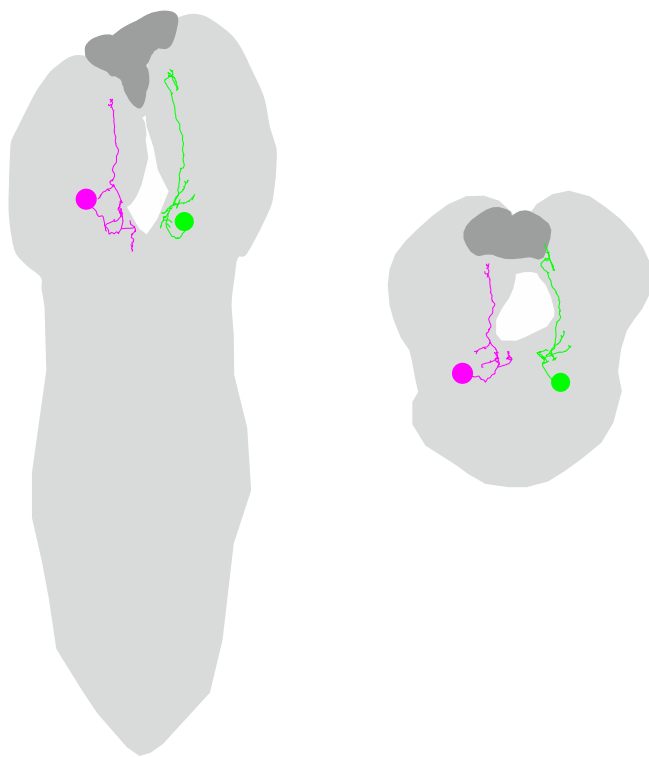

|                   | synapses to |   | synapses from |   |
|-------------------|-------------|---|---------------|---|
| hugin-PC right 1  | 3           | 0 | 0             | 0 |
| hugin-PC right 2  | 5           | 0 | 2             | 0 |
| hugin-PC right 3  | 0           | 0 | 0             | 0 |
| hugin-PC right 4  | 2           | 0 | 2             | 0 |
| hugin-PC left 1   | 0           | 3 | 0             | 5 |
| hugin-PC left 2   | 0           | 4 | 0             | 2 |
| hugin-PC left 3   | 0           | 0 | 0             | 0 |
| hugin-PC left 4   | 0           | 1 | 0             | 1 |
| hugin-RG right 1  | 0           | 0 | 0             | 0 |
| hugin-RG right 2  | 0           | 0 | 0             | 0 |
| hugin-RG left 1   | 0           | 0 | 0             | 0 |
| hugin-RG left 2   | 0           | 0 | 0             | 0 |
| hugin-VNC right 1 | 0           | 0 | 0             | 0 |
| hugin-VNC right 2 | 0           | 0 | 0             | 0 |
| hugin-VNC left 1  | 0           | 0 | 0             | 0 |
| hugin-VNC left 2  | 0           | 0 | 0             | 0 |
| hugin-PH right 1  | 0           | 0 | 0             | 0 |
| hugin-PH right 2  | 0           | 0 | 0             | 0 |
| hugin-PH left 1   | 0           | 0 | 0             | 0 |
| hugin-PH left 2   | 0           | 0 | 0             | 0 |

4.

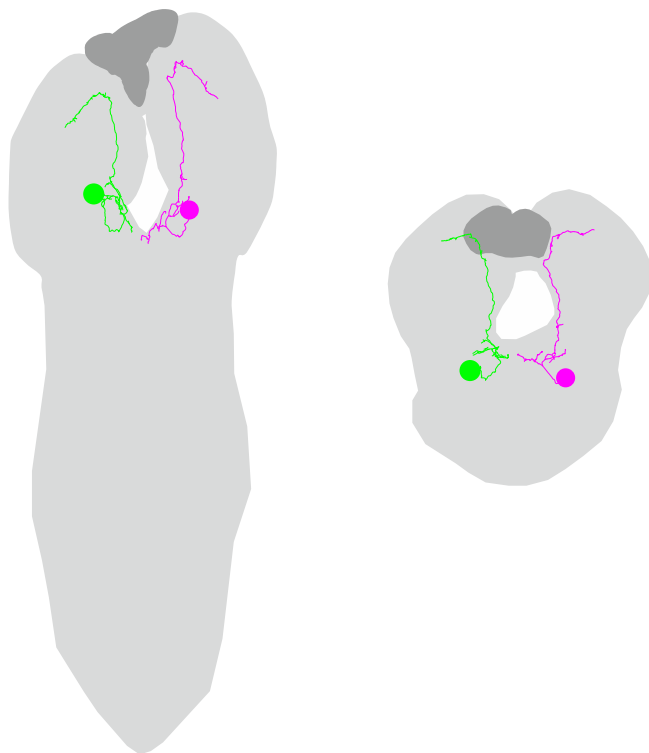

|                   | synapses to |   | synapses from |   |
|-------------------|-------------|---|---------------|---|
| hugin-PC right 1  | 0           | 5 | 0             | 3 |
| hugin-PC right 2  | 0           | 3 | 0             | 1 |
| hugin-PC right 3  | 0           | 2 | 0             | 2 |
| hugin-PC right 4  | 0           | 0 | 0             | 0 |
| hugin-PC left 1   | 7           | 0 | 5             | 0 |
| hugin-PC left 2   | 3           | 0 | 2             | 0 |
| hugin-PC left 3   | 1           | 0 | 1             | 0 |
| hugin-PC left 4   | 0           | 0 | 0             | 0 |
| hugin-RG right 1  | 0           | 0 | 0             | 0 |
| hugin-RG right 2  | 0           | 0 | 0             | 0 |
| hugin-RG left 1   | 0           | 0 | 0             | 0 |
| hugin-RG left 2   | 1           | 0 | 0             | 0 |
| hugin-VNC right 1 | 0           | 0 | 0             | 0 |
| hugin-VNC right 2 | 0           | 0 | 0             | 0 |
| hugin-VNC left 1  | 0           | 0 | 0             | 0 |
| hugin-VNC left 2  | 0           | 0 | 0             | 0 |
| hugin-PH right 1  | 0           | 0 | 0             | 0 |
| hugin-PH right 2  | 0           | 0 | 0             | 0 |
| hugin-PH left 1   | 0           | 0 | 0             | 0 |
| hugin-PH left 2   | 0           | 0 | 0             | 0 |

## B hugin-VNC

1.

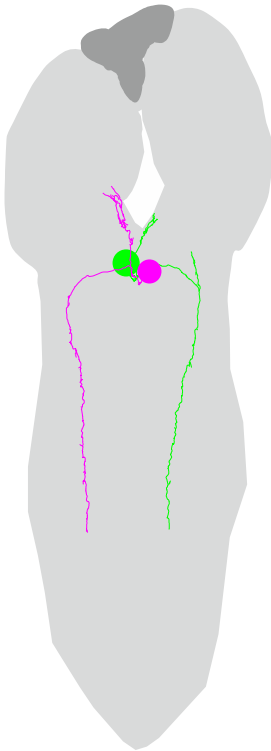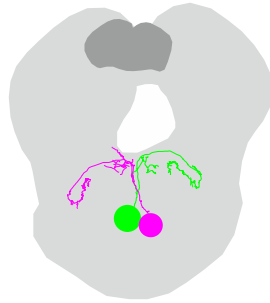

|                   | synapses to |   | synapses from |   |
|-------------------|-------------|---|---------------|---|
| hugin-PC right 1  | 0           | 0 | 0             | 0 |
| hugin-PC right 2  | 0           | 0 | 0             | 0 |
| hugin-PC right 3  | 0           | 0 | 0             | 0 |
| hugin-PC right 4  | 0           | 0 | 0             | 0 |
| hugin-PC left 1   | 0           | 0 | 0             | 2 |
| hugin-PC left 2   | 0           | 0 | 0             | 0 |
| hugin-PC left 3   | 0           | 0 | 0             | 0 |
| hugin-PC left 4   | 0           | 0 | 0             | 0 |
| hugin-RG right 1  | 0           | 0 | 0             | 0 |
| hugin-RG right 2  | 0           | 0 | 0             | 0 |
| hugin-RG left 1   | 0           | 0 | 0             | 0 |
| hugin-RG left 2   | 0           | 0 | 0             | 0 |
| hugin-VNC right 1 | 0           | 2 | 0             | 5 |
| hugin-VNC right 2 | 0           | 0 | 0             | 0 |
| hugin-VNC left 1  | 7           | 0 | 5             | 0 |
| hugin-VNC left 2  | 0           | 0 | 0             | 0 |
| hugin-PH right 1  | 0           | 0 | 0             | 0 |
| hugin-PH right 2  | 0           | 0 | 0             | 0 |
| hugin-PH left 1   | 0           | 0 | 0             | 0 |
| hugin-PH left 2   | 0           | 0 | 0             | 0 |

2.

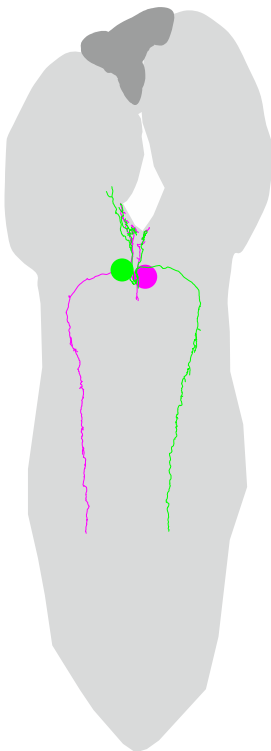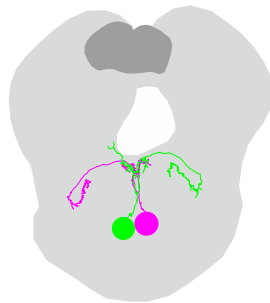

|                   | synapses to |   | synapses from |   |
|-------------------|-------------|---|---------------|---|
| hugin-PC right 1  | 0           | 0 | 0             | 0 |
| hugin-PC right 2  | 0           | 0 | 0             | 0 |
| hugin-PC right 3  | 0           | 0 | 0             | 0 |
| hugin-PC right 4  | 0           | 0 | 0             | 0 |
| hugin-PC left 1   | 0           | 0 | 0             | 0 |
| hugin-PC left 2   | 0           | 0 | 0             | 1 |
| hugin-PC left 3   | 0           | 0 | 0             | 0 |
| hugin-PC left 4   | 0           | 0 | 0             | 0 |
| hugin-RG right 1  | 0           | 0 | 0             | 0 |
| hugin-RG right 2  | 0           | 0 | 0             | 0 |
| hugin-RG left 1   | 0           | 0 | 0             | 0 |
| hugin-RG left 2   | 0           | 0 | 0             | 0 |
| hugin-VNC right 1 | 0           | 0 | 0             | 0 |
| hugin-VNC right 2 | 0           | 5 | 0             | 2 |
| hugin-VNC left 1  | 0           | 0 | 0             | 0 |
| hugin-VNC left 2  | 5           | 0 | 7             | 0 |
| hugin-PH right 1  | 0           | 0 | 0             | 0 |
| hugin-PH right 2  | 0           | 0 | 0             | 0 |
| hugin-PH left 1   | 0           | 0 | 0             | 0 |
| hugin-PH left 2   | 0           | 0 | 0             | 0 |



## C hugin-RG

1.

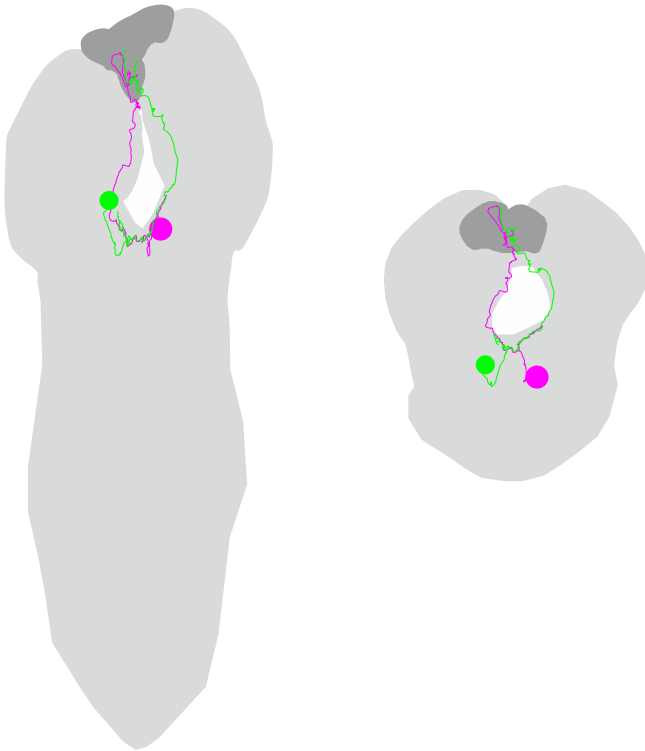

|                   | synapses to |   | synapses from |   |
|-------------------|-------------|---|---------------|---|
| hugin-PC right 1  | 0           | 0 | 0             | 0 |
| hugin-PC right 2  | 0           | 0 | 0             | 0 |
| hugin-PC right 3  | 0           | 0 | 0             | 0 |
| hugin-PC right 4  | 0           | 0 | 0             | 0 |
| hugin-PC left 1   | 0           | 0 | 0             | 0 |
| hugin-PC left 2   | 0           | 0 | 0             | 0 |
| hugin-PC left 3   | 0           | 0 | 0             | 0 |
| hugin-PC left 4   | 0           | 0 | 0             | 0 |
| hugin-RG right 1  | 0           | 0 | 0             | 0 |
| hugin-RG right 2  | 0           | 0 | 0             | 0 |
| hugin-RG left 1   | 0           | 0 | 0             | 0 |
| hugin-RG left 2   | 0           | 0 | 0             | 0 |
| hugin-VNC right 1 | 0           | 0 | 0             | 0 |
| hugin-VNC right 2 | 0           | 0 | 0             | 0 |
| hugin-VNC left 1  | 0           | 0 | 0             | 0 |
| hugin-VNC left 2  | 0           | 0 | 0             | 0 |
| hugin-PH right 1  | 0           | 0 | 0             | 0 |
| hugin-PH right 2  | 0           | 0 | 0             | 0 |
| hugin-PH left 1   | 0           | 0 | 0             | 0 |
| hugin-PH left 2   | 0           | 0 | 0             | 0 |

2.

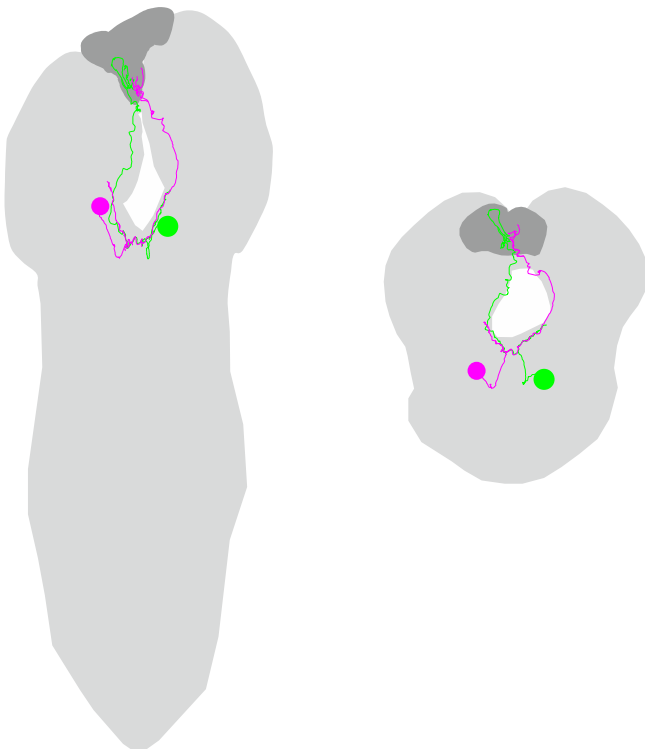

|                   | synapses to |   | synapses from |   |
|-------------------|-------------|---|---------------|---|
| hugin-PC right 1  | 0           | 0 | 0             | 0 |
| hugin-PC right 2  | 0           | 0 | 0             | 0 |
| hugin-PC right 3  | 0           | 0 | 0             | 0 |
| hugin-PC right 4  | 0           | 0 | 0             | 0 |
| hugin-PC left 1   | 0           | 0 | 0             | 1 |
| hugin-PC left 2   | 0           | 0 | 0             | 0 |
| hugin-PC left 3   | 0           | 0 | 0             | 0 |
| hugin-PC left 4   | 0           | 0 | 0             | 1 |
| hugin-RG right 1  | 0           | 0 | 0             | 0 |
| hugin-RG right 2  | 0           | 0 | 0             | 0 |
| hugin-RG left 1   | 0           | 0 | 0             | 0 |
| hugin-RG left 2   | 0           | 0 | 0             | 0 |
| hugin-VNC right 1 | 0           | 0 | 0             | 0 |
| hugin-VNC right 2 | 0           | 0 | 0             | 0 |
| hugin-VNC left 1  | 0           | 0 | 0             | 0 |
| hugin-VNC left 2  | 0           | 0 | 0             | 0 |
| hugin-PH right 1  | 0           | 0 | 0             | 0 |
| hugin-PH right 2  | 0           | 0 | 0             | 0 |
| hugin-PH left 1   | 0           | 0 | 0             | 0 |
| hugin-PH left 2   | 0           | 0 | 0             | 0 |

## D hugin-PH

1.

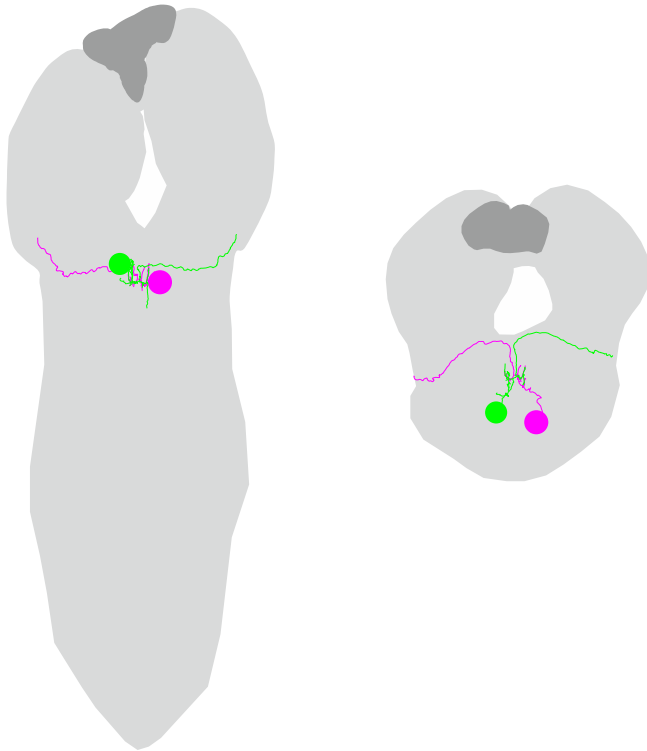

|                   | synapses to |   | synapses from |   |
|-------------------|-------------|---|---------------|---|
| hugin-PC right 1  | 0           | 0 | 0             | 0 |
| hugin-PC right 2  | 0           | 0 | 0             | 0 |
| hugin-PC right 3  | 0           | 0 | 0             | 0 |
| hugin-PC right 4  | 0           | 0 | 0             | 0 |
| hugin-PC left 1   | 0           | 0 | 0             | 0 |
| hugin-PC left 2   | 0           | 0 | 0             | 0 |
| hugin-PC left 3   | 0           | 0 | 0             | 0 |
| hugin-PC left 4   | 0           | 0 | 0             | 0 |
| hugin-RG right 1  | 0           | 0 | 0             | 0 |
| hugin-RG right 2  | 0           | 0 | 0             | 0 |
| hugin-RG left 1   | 0           | 0 | 0             | 0 |
| hugin-RG left 2   | 0           | 0 | 0             | 0 |
| hugin-VNC right 1 | 0           | 0 | 0             | 0 |
| hugin-VNC right 2 | 0           | 0 | 0             | 0 |
| hugin-VNC left 1  | 0           | 0 | 0             | 0 |
| hugin-VNC left 2  | 0           | 0 | 0             | 0 |
| hugin-PH right 1  | 0           | 0 | 0             | 0 |
| hugin-PH right 2  | 0           | 0 | 0             | 0 |
| hugin-PH left 1   | 0           | 0 | 0             | 1 |
| hugin-PH left 2   | 0           | 0 | 0             | 0 |

2.

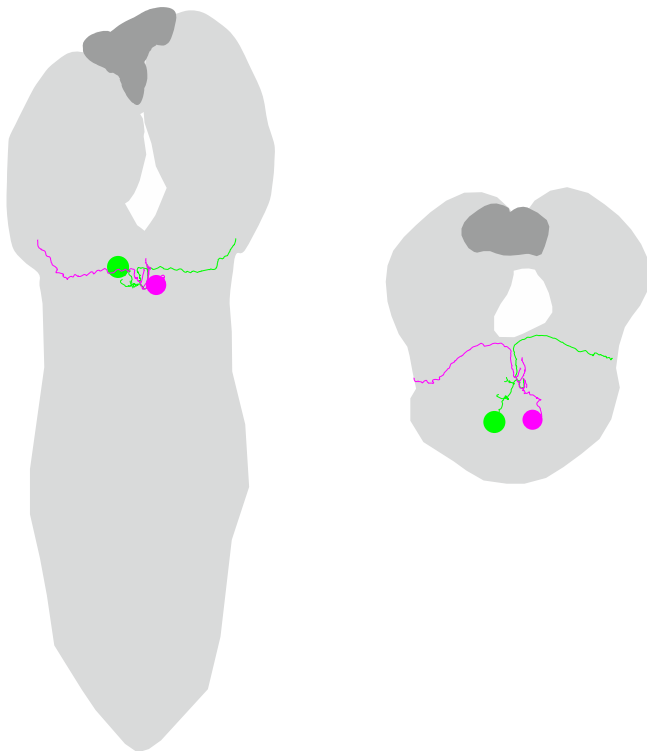

|                   | synapses to |   | synapses from |   |
|-------------------|-------------|---|---------------|---|
| hugin-PC right 1  | 0           | 0 | 0             | 0 |
| hugin-PC right 2  | 0           | 0 | 0             | 0 |
| hugin-PC right 3  | 0           | 0 | 0             | 0 |
| hugin-PC right 4  | 0           | 0 | 0             | 0 |
| hugin-PC left 1   | 0           | 0 | 0             | 0 |
| hugin-PC left 2   | 0           | 0 | 0             | 0 |
| hugin-PC left 3   | 0           | 0 | 0             | 0 |
| hugin-PC left 4   | 0           | 0 | 0             | 0 |
| hugin-RG right 1  | 0           | 0 | 0             | 0 |
| hugin-RG right 2  | 0           | 0 | 0             | 0 |
| hugin-RG left 1   | 0           | 0 | 0             | 0 |
| hugin-RG left 2   | 0           | 0 | 0             | 0 |
| hugin-VNC right 1 | 0           | 0 | 0             | 0 |
| hugin-VNC right 2 | 0           | 0 | 0             | 0 |
| hugin-VNC left 1  | 0           | 0 | 0             | 0 |
| hugin-VNC left 2  | 0           | 0 | 0             | 0 |
| hugin-PH right 1  | 0           | 0 | 0             | 0 |
| hugin-PH right 2  | 1           | 0 | 0             | 0 |
| hugin-PH left 1   | 0           | 0 | 0             | 0 |
| hugin-PH left 2   | 0           | 0 | 0             | 0 |

## E Insulin-producing cells (IPCs)

1.

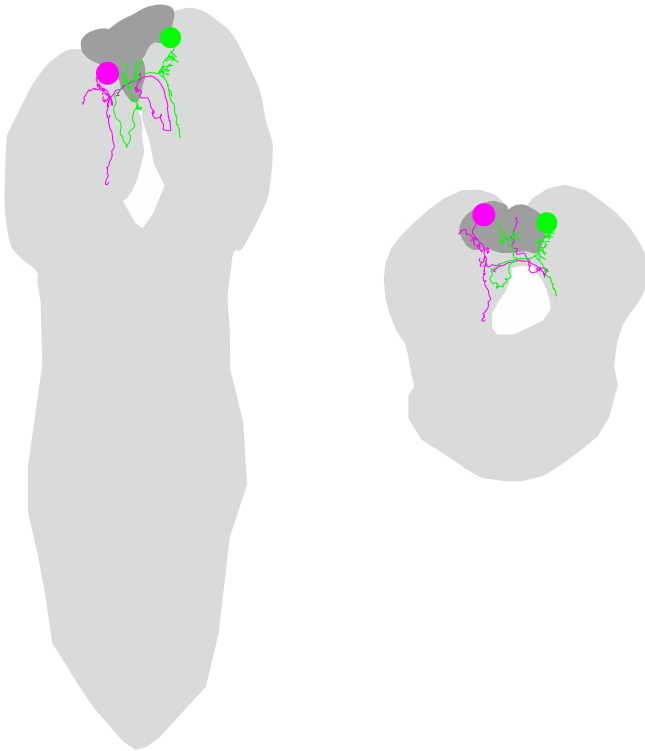

|                   | synapses to |   | synapses from |   |
|-------------------|-------------|---|---------------|---|
| hugin-PC right 1  | 0           | 0 | 2             | 0 |
| hugin-PC right 2  | 0           | 0 | 6             | 0 |
| hugin-PC right 3  | 0           | 0 | 2             | 0 |
| hugin-PC right 4  | 0           | 0 | 0             | 0 |
| hugin-PC left 1   | 0           | 0 | 0             | 2 |
| hugin-PC left 2   | 0           | 0 | 0             | 0 |
| hugin-PC left 3   | 0           | 0 | 0             | 2 |
| hugin-PC left 4   | 0           | 0 | 0             | 2 |
| hugin-RG right 1  | 0           | 0 | 0             | 0 |
| hugin-RG right 2  | 0           | 0 | 0             | 0 |
| hugin-RG left 1   | 0           | 0 | 0             | 0 |
| hugin-RG left 2   | 0           | 0 | 0             | 0 |
| hugin-VNC right 1 | 0           | 0 | 0             | 0 |
| hugin-VNC right 2 | 0           | 0 | 0             | 0 |
| hugin-VNC left 1  | 0           | 0 | 0             | 0 |
| hugin-VNC left 2  | 0           | 0 | 0             | 0 |
| hugin-PH right 1  | 0           | 0 | 0             | 0 |
| hugin-PH right 2  | 0           | 0 | 0             | 0 |
| hugin-PH left 1   | 0           | 0 | 0             | 0 |
| hugin-PH left 2   | 0           | 0 | 0             | 0 |

2.

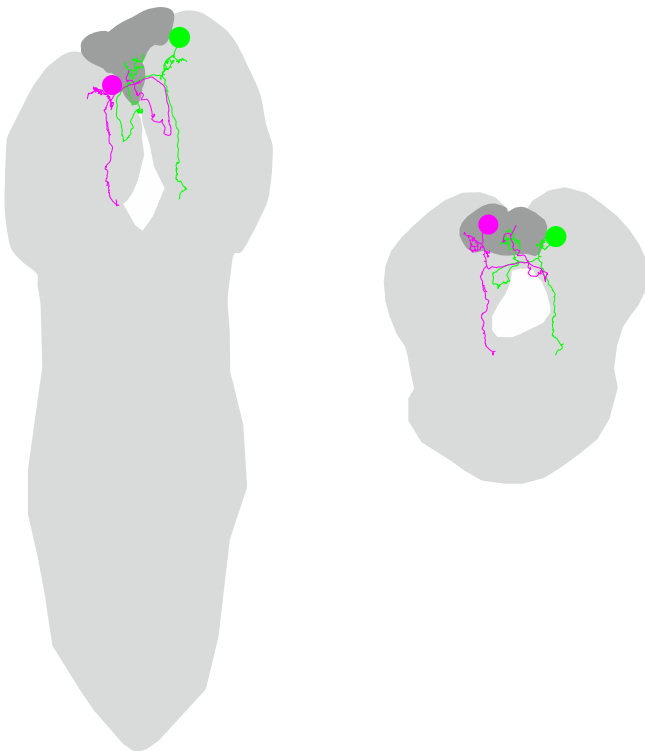

|                   | synapses to |   | synapses from |   |
|-------------------|-------------|---|---------------|---|
| hugin-PC right 1  | 0           | 0 | 3             | 0 |
| hugin-PC right 2  | 0           | 0 | 5             | 0 |
| hugin-PC right 3  | 0           | 0 | 1             | 0 |
| hugin-PC right 4  | 0           | 0 | 1             | 0 |
| hugin-PC left 1   | 0           | 0 | 0             | 2 |
| hugin-PC left 2   | 0           | 0 | 0             | 1 |
| hugin-PC left 3   | 0           | 0 | 0             | 0 |
| hugin-PC left 4   | 0           | 0 | 0             | 3 |
| hugin-RG right 1  | 0           | 0 | 1             | 0 |
| hugin-RG right 2  | 0           | 0 | 0             | 0 |
| hugin-RG left 1   | 0           | 0 | 0             | 0 |
| hugin-RG left 2   | 0           | 0 | 0             | 0 |
| hugin-VNC right 1 | 0           | 0 | 0             | 0 |
| hugin-VNC right 2 | 0           | 0 | 0             | 0 |
| hugin-VNC left 1  | 0           | 0 | 0             | 0 |
| hugin-VNC left 2  | 0           | 0 | 0             | 0 |
| hugin-PH right 1  | 0           | 0 | 0             | 0 |
| hugin-PH right 2  | 0           | 0 | 0             | 0 |
| hugin-PH left 1   | 0           | 0 | 0             | 0 |
| hugin-PH left 2   | 0           | 0 | 0             | 0 |

3.

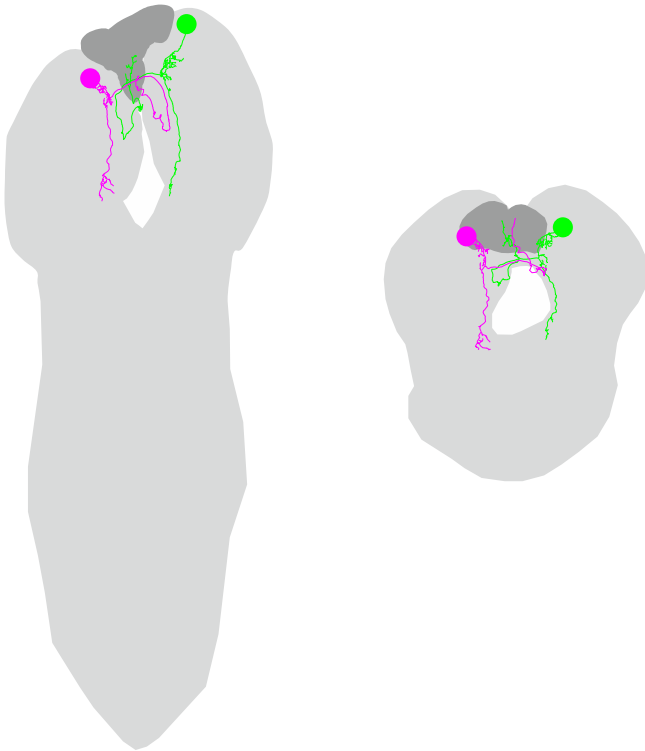

|                   | synapses to |   | synapses from |   |
|-------------------|-------------|---|---------------|---|
| hugin-PC right 1  | 0           | 0 | 4             | 0 |
| hugin-PC right 2  | 0           | 0 | 5             | 0 |
| hugin-PC right 3  | 0           | 0 | 3             | 0 |
| hugin-PC right 4  | 0           | 0 | 1             | 0 |
| hugin-PC left 1   | 0           | 0 | 0             | 0 |
| hugin-PC left 2   | 0           | 0 | 0             | 5 |
| hugin-PC left 3   | 0           | 0 | 0             | 3 |
| hugin-PC left 4   | 0           | 0 | 0             | 3 |
| hugin-RG right 1  | 0           | 0 | 0             | 0 |
| hugin-RG right 2  | 0           | 0 | 0             | 0 |
| hugin-RG left 1   | 0           | 0 | 0             | 0 |
| hugin-RG left 2   | 0           | 0 | 0             | 0 |
| hugin-VNC right 1 | 0           | 0 | 0             | 0 |
| hugin-VNC right 2 | 0           | 0 | 0             | 0 |
| hugin-VNC left 1  | 0           | 0 | 0             | 0 |
| hugin-VNC left 2  | 0           | 0 | 0             | 0 |
| hugin-PH right 1  | 0           | 0 | 0             | 0 |
| hugin-PH right 2  | 0           | 0 | 0             | 0 |
| hugin-PH left 1   | 0           | 0 | 0             | 0 |
| hugin-PH left 2   | 0           | 0 | 0             | 0 |

4.

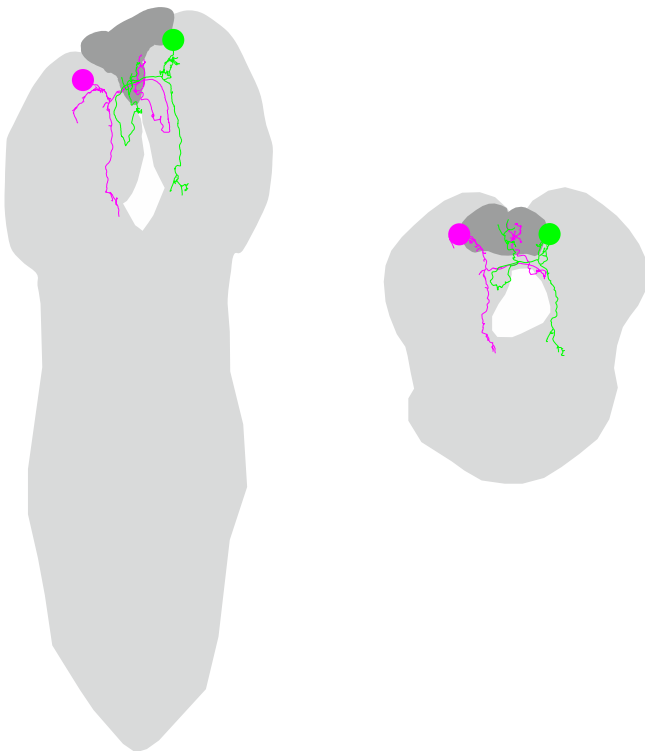

|                   | synapses to |   | synapses from |   |
|-------------------|-------------|---|---------------|---|
| hugin-PC right 1  | 0           | 0 | 3             | 0 |
| hugin-PC right 2  | 0           | 0 | 3             | 0 |
| hugin-PC right 3  | 0           | 0 | 0             | 0 |
| hugin-PC right 4  | 0           | 0 | 1             | 0 |
| hugin-PC left 1   | 0           | 0 | 0             | 9 |
| hugin-PC left 2   | 0           | 0 | 0             | 1 |
| hugin-PC left 3   | 0           | 0 | 0             | 1 |
| hugin-PC left 4   | 0           | 0 | 0             | 2 |
| hugin-RG right 1  | 0           | 0 | 0             | 0 |
| hugin-RG right 2  | 0           | 0 | 0             | 0 |
| hugin-RG left 1   | 0           | 0 | 0             | 0 |
| hugin-RG left 2   | 0           | 0 | 0             | 0 |
| hugin-VNC right 1 | 0           | 0 | 0             | 0 |
| hugin-VNC right 2 | 0           | 0 | 0             | 0 |
| hugin-VNC left 1  | 0           | 0 | 0             | 0 |
| hugin-VNC left 2  | 0           | 0 | 0             | 0 |
| hugin-PH right 1  | 0           | 0 | 0             | 0 |
| hugin-PH right 2  | 0           | 0 | 0             | 0 |
| hugin-PH left 1   | 0           | 0 | 0             | 0 |
| hugin-PH left 2   | 0           | 0 | 0             | 0 |



5.

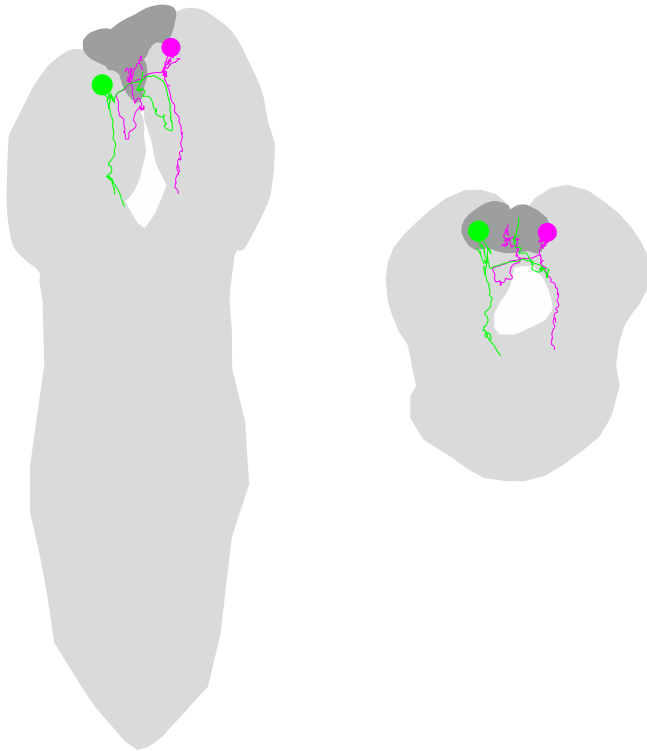

|                   | synapses to |   | synapses from |   |
|-------------------|-------------|---|---------------|---|
| hugin-PC right 1  | 0           | 0 | 0             | 1 |
| hugin-PC right 2  | 0           | 0 | 0             | 4 |
| hugin-PC right 3  | 0           | 0 | 0             | 5 |
| hugin-PC right 4  | 0           | 0 | 0             | 0 |
| hugin-PC left 1   | 0           | 0 | 3             | 0 |
| hugin-PC left 2   | 0           | 0 | 3             | 0 |
| hugin-PC left 3   | 0           | 0 | 3             | 0 |
| hugin-PC left 4   | 0           | 0 | 2             | 0 |
| hugin-RG right 1  | 0           | 0 | 0             | 0 |
| hugin-RG right 2  | 0           | 0 | 0             | 0 |
| hugin-RG left 1   | 0           | 0 | 0             | 0 |
| hugin-RG left 2   | 0           | 0 | 0             | 0 |
| hugin-VNC right 1 | 0           | 0 | 0             | 0 |
| hugin-VNC right 2 | 0           | 0 | 0             | 0 |
| hugin-VNC left 1  | 0           | 0 | 0             | 0 |
| hugin-VNC left 2  | 0           | 0 | 0             | 0 |
| hugin-PH right 1  | 0           | 0 | 0             | 0 |
| hugin-PH right 2  | 0           | 0 | 0             | 0 |
| hugin-PH left 1   | 0           | 0 | 0             | 0 |
| hugin-PH left 2   | 0           | 0 | 0             | 0 |

6.

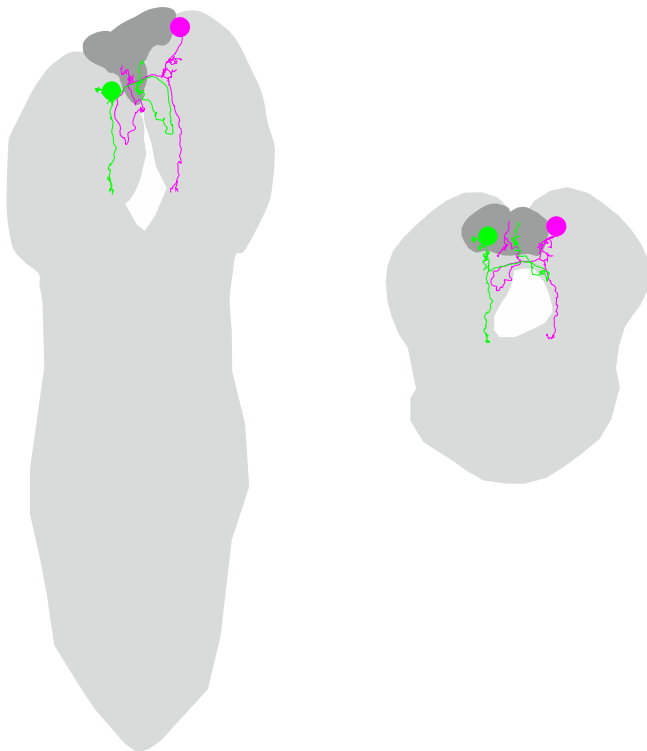

|                   | synapses to |   | synapses from |   |
|-------------------|-------------|---|---------------|---|
| hugin-PC right 1  | 0           | 0 | 0             | 7 |
| hugin-PC right 2  | 0           | 0 | 0             | 1 |
| hugin-PC right 3  | 0           | 0 | 0             | 1 |
| hugin-PC right 4  | 0           | 0 | 0             | 1 |
| hugin-PC left 1   | 0           | 0 | 4             | 0 |
| hugin-PC left 2   | 0           | 0 | 3             | 0 |
| hugin-PC left 3   | 0           | 0 | 3             | 0 |
| hugin-PC left 4   | 0           | 0 | 0             | 0 |
| hugin-RG right 1  | 0           | 0 | 0             | 0 |
| hugin-RG right 2  | 0           | 0 | 0             | 0 |
| hugin-RG left 1   | 0           | 0 | 0             | 0 |
| hugin-RG left 2   | 0           | 0 | 0             | 0 |
| hugin-VNC right 1 | 0           | 0 | 0             | 0 |
| hugin-VNC right 2 | 0           | 0 | 0             | 0 |
| hugin-VNC left 1  | 0           | 0 | 0             | 0 |
| hugin-VNC left 2  | 0           | 0 | 0             | 0 |
| hugin-PH right 1  | 0           | 0 | 0             | 0 |
| hugin-PH right 2  | 0           | 0 | 0             | 0 |
| hugin-PH left 1   | 0           | 0 | 0             | 0 |
| hugin-PH left 2   | 0           | 0 | 0             | 0 |

7.

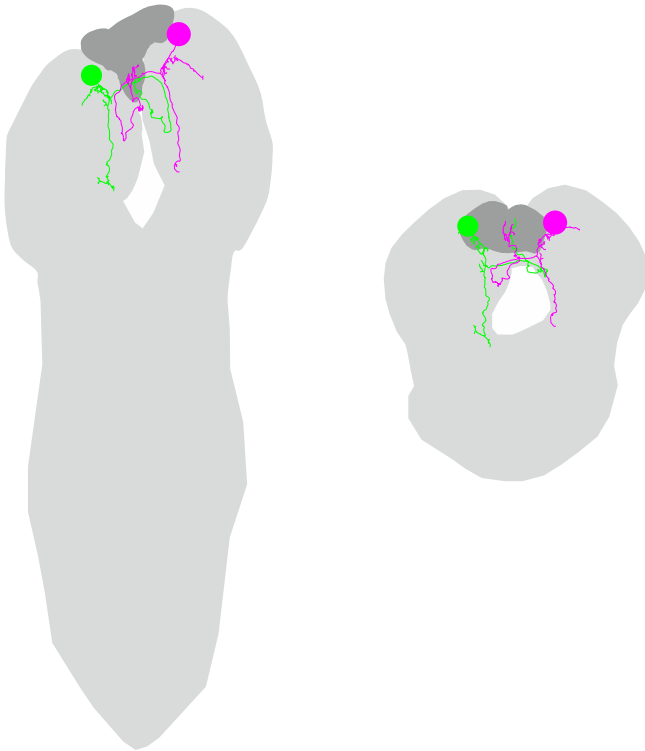

|                   | synapses to |   | synapses from |   |
|-------------------|-------------|---|---------------|---|
| hugin-PC right 1  | 0           | 1 | 0             | 7 |
| hugin-PC right 2  | 0           | 0 | 0             | 3 |
| hugin-PC right 3  | 0           | 0 | 0             | 3 |
| hugin-PC right 4  | 0           | 0 | 0             | 1 |
| hugin-PC left 1   | 0           | 0 | 7             | 0 |
| hugin-PC left 2   | 0           | 0 | 2             | 0 |
| hugin-PC left 3   | 0           | 0 | 4             | 0 |
| hugin-PC left 4   | 0           | 0 | 1             | 0 |
| hugin-RG right 1  | 0           | 0 | 0             | 0 |
| hugin-RG right 2  | 0           | 0 | 0             | 0 |
| hugin-RG left 1   | 0           | 0 | 0             | 0 |
| hugin-RG left 2   | 0           | 0 | 0             | 0 |
| hugin-VNC right 1 | 0           | 0 | 0             | 0 |
| hugin-VNC right 2 | 0           | 0 | 0             | 0 |
| hugin-VNC left 1  | 0           | 0 | 0             | 0 |
| hugin-VNC left 2  | 0           | 0 | 0             | 0 |
| hugin-PH right 1  | 0           | 0 | 0             | 0 |
| hugin-PH right 2  | 0           | 0 | 0             | 0 |
| hugin-PH left 1   | 0           | 0 | 0             | 0 |
| hugin-PH left 2   | 0           | 0 | 0             | 0 |

## F DH44-producing mNSCs

1.

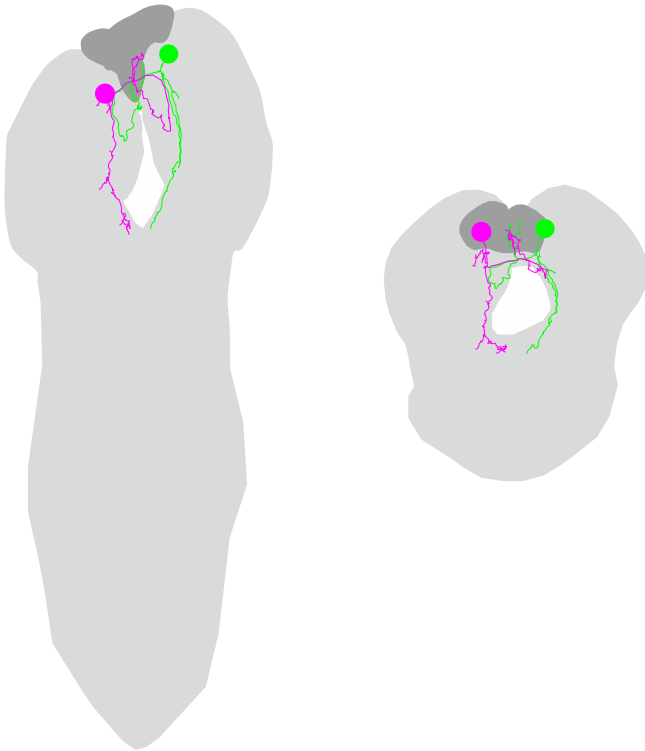

|                   | synapses to |   | synapses from |   |
|-------------------|-------------|---|---------------|---|
| hugin-PC right 1  | 0           | 0 | 0             | 0 |
| hugin-PC right 2  | 0           | 0 | 1             | 0 |
| hugin-PC right 3  | 0           | 0 | 1             | 0 |
| hugin-PC right 4  | 0           | 0 | 0             | 0 |
| hugin-PC left 1   | 0           | 0 | 0             | 1 |
| hugin-PC left 2   | 0           | 0 | 0             | 0 |
| hugin-PC left 3   | 0           | 0 | 0             | 2 |
| hugin-PC left 4   | 0           | 0 | 0             | 0 |
| hugin-RG right 1  | 0           | 0 | 0             | 0 |
| hugin-RG right 2  | 0           | 0 | 0             | 0 |
| hugin-RG left 1   | 0           | 0 | 0             | 0 |
| hugin-RG left 2   | 0           | 0 | 0             | 0 |
| hugin-VNC right 1 | 0           | 0 | 0             | 0 |
| hugin-VNC right 2 | 0           | 0 | 0             | 0 |
| hugin-VNC left 1  | 0           | 0 | 0             | 0 |
| hugin-VNC left 2  | 0           | 0 | 0             | 0 |
| hugin-PH right 1  | 0           | 0 | 0             | 0 |
| hugin-PH right 2  | 0           | 0 | 0             | 0 |
| hugin-PH left 1   | 0           | 0 | 0             | 0 |
| hugin-PH left 2   | 0           | 0 | 0             | 0 |

2.

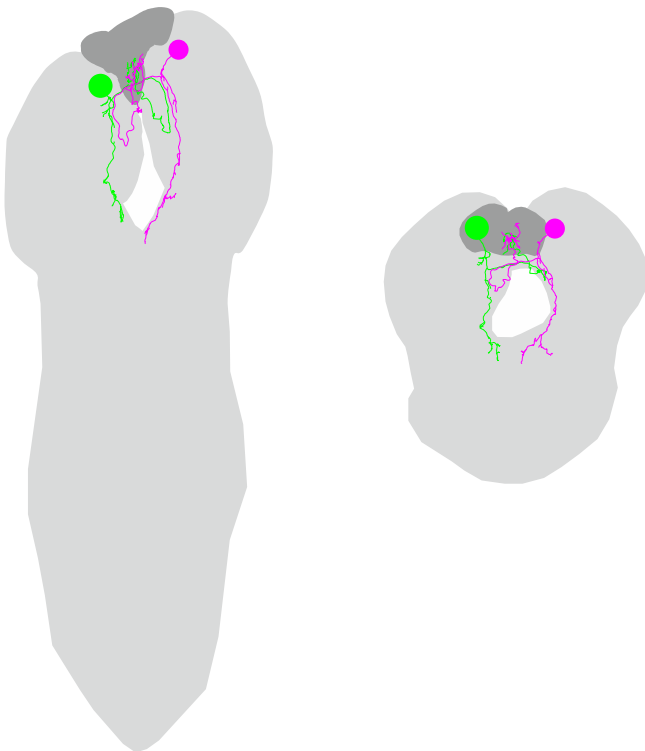

|                   | synapses to |   | synapses from |   |
|-------------------|-------------|---|---------------|---|
| hugin-PC right 1  | 0           | 0 | 0             | 0 |
| hugin-PC right 2  | 0           | 0 | 0             | 0 |
| hugin-PC right 3  | 0           | 0 | 0             | 0 |
| hugin-PC right 4  | 0           | 0 | 0             | 0 |
| hugin-PC left 1   | 0           | 0 | 0             | 0 |
| hugin-PC left 2   | 0           | 0 | 0             | 0 |
| hugin-PC left 3   | 0           | 0 | 1             | 0 |
| hugin-PC left 4   | 0           | 0 | 0             | 0 |
| hugin-RG right 1  | 0           | 0 | 0             | 0 |
| hugin-RG right 2  | 0           | 0 | 0             | 0 |
| hugin-RG left 1   | 0           | 0 | 0             | 0 |
| hugin-RG left 2   | 0           | 0 | 0             | 0 |
| hugin-VNC right 1 | 0           | 0 | 0             | 0 |
| hugin-VNC right 2 | 0           | 0 | 0             | 0 |
| hugin-VNC left 1  | 0           | 0 | 0             | 0 |
| hugin-VNC left 2  | 0           | 0 | 0             | 0 |
| hugin-PH right 1  | 0           | 0 | 0             | 0 |
| hugin-PH right 2  | 0           | 0 | 0             | 0 |
| hugin-PH left 1   | 0           | 0 | 0             | 0 |
| hugin-PH left 2   | 0           | 0 | 0             | 0 |

3.

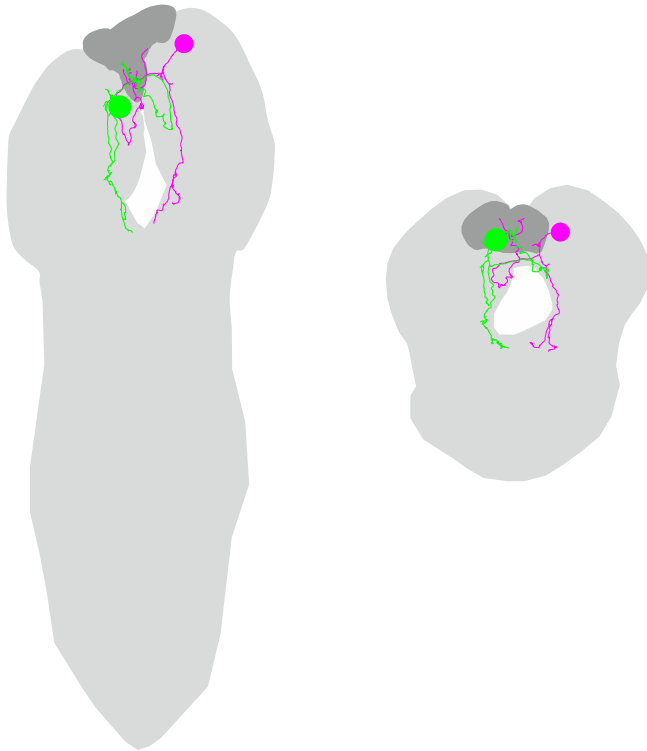

|                   | synapses to |   | synapses from |   |
|-------------------|-------------|---|---------------|---|
| hugin-PC right 1  | 0           | 0 | 0             | 0 |
| hugin-PC right 2  | 0           | 0 | 0             | 0 |
| hugin-PC right 3  | 0           | 0 | 0             | 0 |
| hugin-PC right 4  | 0           | 0 | 0             | 0 |
| hugin-PC left 1   | 0           | 0 | 0             | 0 |
| hugin-PC left 2   | 0           | 0 | 0             | 0 |
| hugin-PC left 3   | 0           | 0 | 0             | 0 |
| hugin-PC left 4   | 0           | 0 | 0             | 0 |
| hugin-RG right 1  | 0           | 0 | 0             | 0 |
| hugin-RG right 2  | 0           | 0 | 0             | 0 |
| hugin-RG left 1   | 0           | 0 | 0             | 0 |
| hugin-RG left 2   | 0           | 0 | 0             | 0 |
| hugin-VNC right 1 | 0           | 0 | 0             | 0 |
| hugin-VNC right 2 | 0           | 0 | 0             | 0 |
| hugin-VNC left 1  | 0           | 0 | 0             | 0 |
| hugin-VNC left 2  | 0           | 0 | 0             | 0 |
| hugin-PH right 1  | 0           | 0 | 0             | 0 |
| hugin-PH right 2  | 0           | 0 | 0             | 0 |
| hugin-PH left 1   | 0           | 0 | 0             | 0 |
| hugin-PH left 2   | 0           | 0 | 0             | 0 |



## G DMS-producing mNSCs

1.

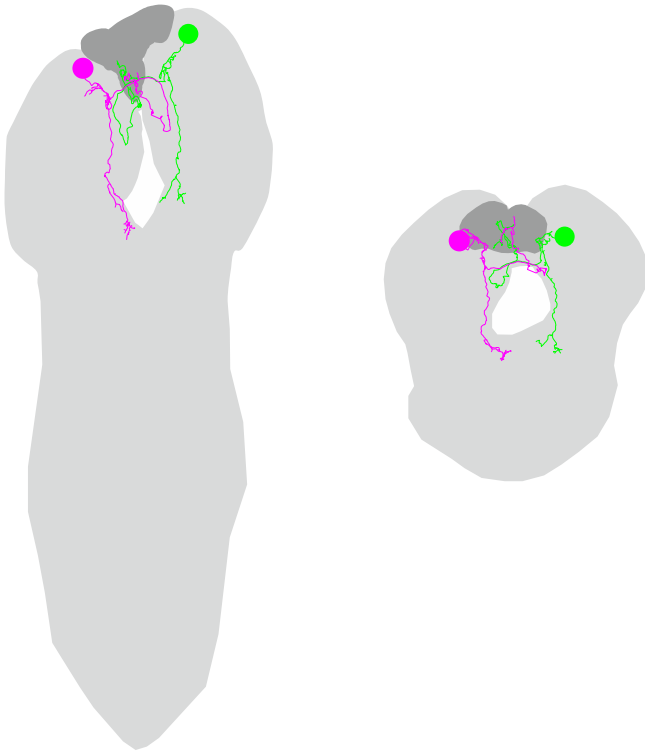

|                   | synapses to |   | synapses from |   |
|-------------------|-------------|---|---------------|---|
| hugin-PC right 1  | 0           | 0 | 0             | 0 |
| hugin-PC right 2  | 0           | 0 | 0             | 0 |
| hugin-PC right 3  | 0           | 0 | 0             | 0 |
| hugin-PC right 4  | 0           | 0 | 1             | 0 |
| hugin-PC left 1   | 0           | 0 | 0             | 1 |
| hugin-PC left 2   | 0           | 0 | 0             | 3 |
| hugin-PC left 3   | 0           | 0 | 0             | 0 |
| hugin-PC left 4   | 0           | 0 | 0             | 3 |
| hugin-RG right 1  | 0           | 0 | 0             | 0 |
| hugin-RG right 2  | 0           | 0 | 0             | 0 |
| hugin-RG left 1   | 0           | 0 | 0             | 0 |
| hugin-RG left 2   | 0           | 0 | 0             | 0 |
| hugin-VNC right 1 | 0           | 0 | 0             | 0 |
| hugin-VNC right 2 | 0           | 0 | 0             | 0 |
| hugin-VNC left 1  | 0           | 0 | 0             | 0 |
| hugin-VNC left 2  | 0           | 0 | 0             | 0 |
| hugin-PH right 1  | 0           | 0 | 0             | 0 |
| hugin-PH right 2  | 0           | 0 | 0             | 0 |
| hugin-PH left 1   | 0           | 0 | 0             | 0 |
| hugin-PH left 2   | 0           | 0 | 0             | 0 |

2.

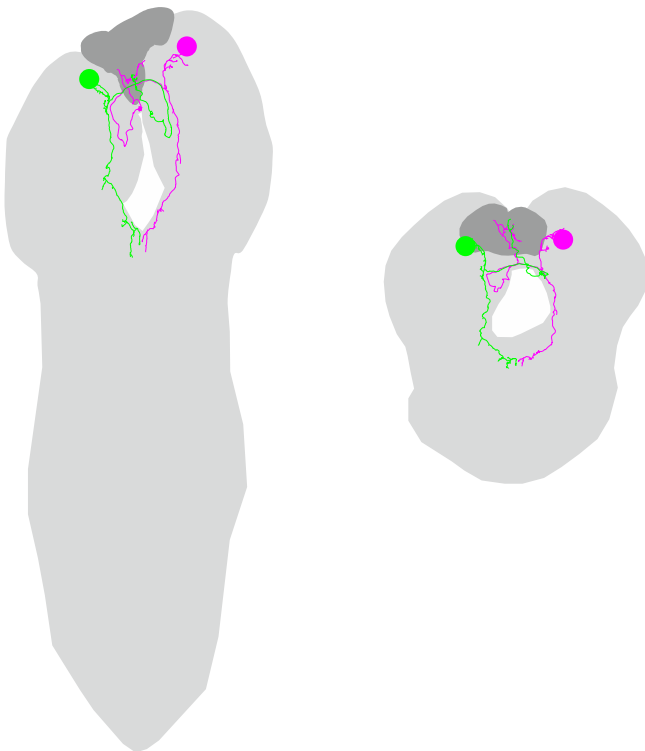

|                   | synapses to |   | synapses from |   |
|-------------------|-------------|---|---------------|---|
| hugin-PC right 1  | 0           | 0 | 0             | 0 |
| hugin-PC right 2  | 0           | 0 | 0             | 0 |
| hugin-PC right 3  | 0           | 0 | 0             | 0 |
| hugin-PC right 4  | 0           | 0 | 0             | 0 |
| hugin-PC left 1   | 0           | 0 | 1             | 0 |
| hugin-PC left 2   | 0           | 0 | 0             | 0 |
| hugin-PC left 3   | 0           | 0 | 2             | 0 |
| hugin-PC left 4   | 0           | 0 | 0             | 0 |
| hugin-RG right 1  | 0           | 0 | 0             | 0 |
| hugin-RG right 2  | 0           | 0 | 0             | 0 |
| hugin-RG left 1   | 0           | 0 | 0             | 0 |
| hugin-RG left 2   | 0           | 0 | 0             | 0 |
| hugin-VNC right 1 | 0           | 0 | 0             | 0 |
| hugin-VNC right 2 | 0           | 0 | 0             | 0 |
| hugin-VNC left 1  | 0           | 0 | 0             | 0 |
| hugin-VNC left 2  | 0           | 0 | 0             | 0 |
| hugin-PH right 1  | 0           | 0 | 0             | 0 |
| hugin-PH right 2  | 0           | 0 | 0             | 0 |
| hugin-PH left 1   | 0           | 0 | 0             | 0 |
| hugin-PH left 2   | 0           | 0 | 0             | 0 |

# H AN sensory neurons

1.

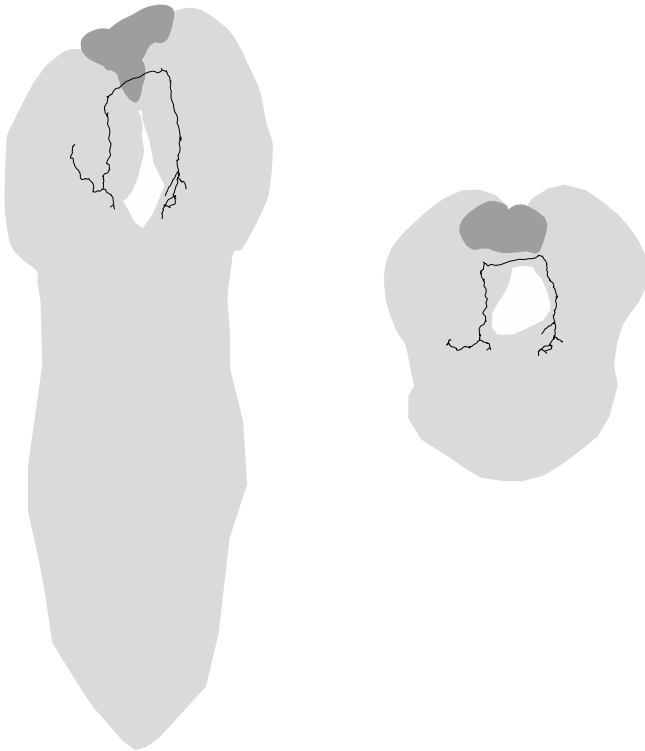

synapses to

synapses from

|                   |   |   |
|-------------------|---|---|
| hugin-PC right 1  | 0 | 2 |
| hugin-PC right 2  | 1 | 1 |
| hugin-PC right 3  | 0 | 0 |
| hugin-PC right 4  | 0 | 0 |
| hugin-PC left 1   | 2 | 0 |
| hugin-PC left 2   | 0 | 0 |
| hugin-PC left 3   | 2 | 0 |
| hugin-PC left 4   | 1 | 0 |
| hugin-RG right 1  | 0 | 0 |
| hugin-RG right 2  | 0 | 0 |
| hugin-RG left 1   | 0 | 0 |
| hugin-RG left 2   | 0 | 0 |
| hugin-VNC right 1 | 0 | 0 |
| hugin-VNC right 2 | 0 | 0 |
| hugin-VNC left 1  | 0 | 0 |
| hugin-VNC left 2  | 0 | 0 |
| hugin-PH right 1  | 0 | 0 |
| hugin-PH right 2  | 0 | 0 |
| hugin-PH left 1   | 0 | 0 |
| hugin-PH left 2   | 0 | 0 |

2.

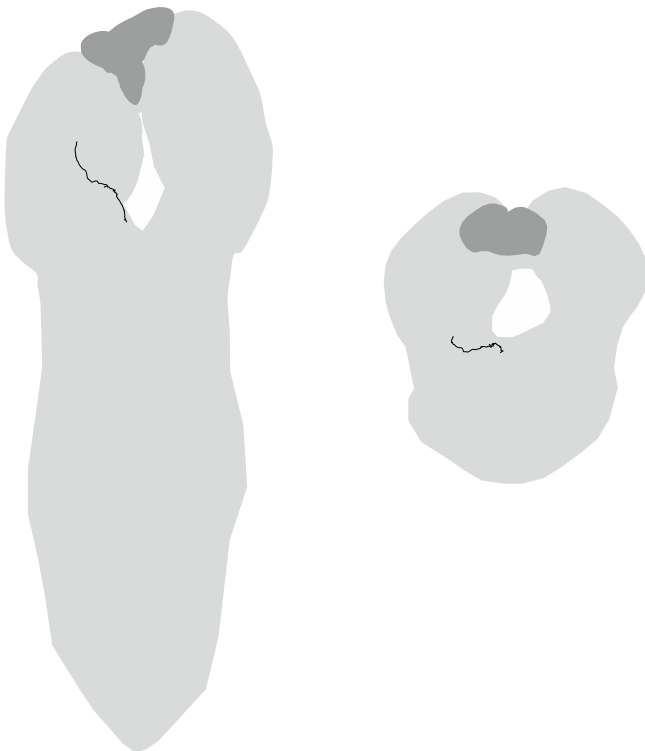

synapses to

synapses from

|                   |   |   |
|-------------------|---|---|
| hugin-PC right 1  | 0 | 0 |
| hugin-PC right 2  | 0 | 0 |
| hugin-PC right 3  | 0 | 0 |
| hugin-PC right 4  | 0 | 0 |
| hugin-PC left 1   | 0 | 0 |
| hugin-PC left 2   | 0 | 0 |
| hugin-PC left 3   | 0 | 0 |
| hugin-PC left 4   | 0 | 0 |
| hugin-RG right 1  | 0 | 0 |
| hugin-RG right 2  | 0 | 0 |
| hugin-RG left 1   | 0 | 0 |
| hugin-RG left 2   | 0 | 0 |
| hugin-VNC right 1 | 1 | 0 |
| hugin-VNC right 2 | 2 | 0 |
| hugin-VNC left 1  | 0 | 0 |
| hugin-VNC left 2  | 0 | 0 |
| hugin-PH right 1  | 0 | 0 |
| hugin-PH right 2  | 0 | 0 |
| hugin-PH left 1   | 0 | 0 |
| hugin-PH left 2   | 0 | 0 |

3.

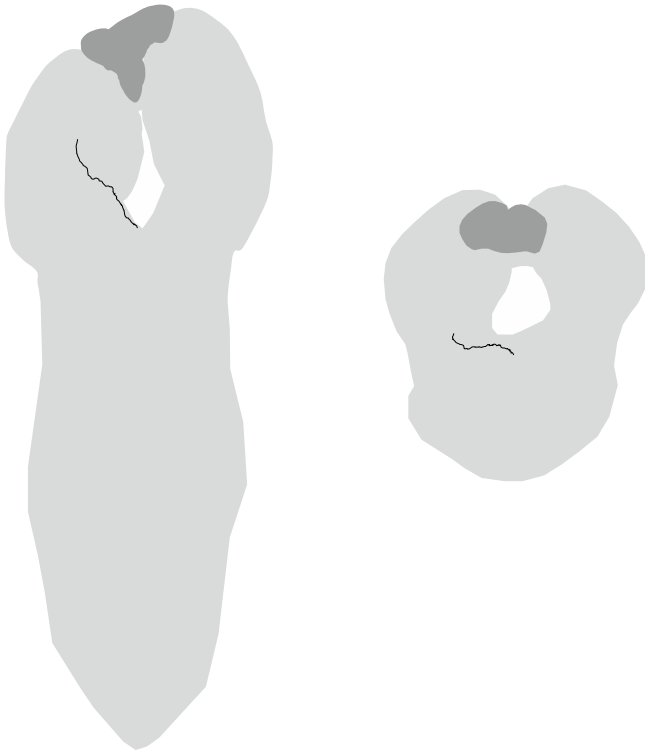

synapses to      synapses from

|                   |   |   |
|-------------------|---|---|
| hugin-PC right 1  | 0 | 0 |
| hugin-PC right 2  | 0 | 0 |
| hugin-PC right 3  | 0 | 0 |
| hugin-PC right 4  | 0 | 0 |
| hugin-PC left 1   | 0 | 0 |
| hugin-PC left 2   | 0 | 0 |
| hugin-PC left 3   | 0 | 0 |
| hugin-PC left 4   | 1 | 0 |
| hugin-RG right 1  | 0 | 0 |
| hugin-RG right 2  | 0 | 0 |
| hugin-RG left 1   | 0 | 0 |
| hugin-RG left 2   | 0 | 0 |
| hugin-VNC right 1 | 1 | 0 |
| hugin-VNC right 2 | 0 | 0 |
| hugin-VNC left 1  | 0 | 0 |
| hugin-VNC left 2  | 0 | 0 |
| hugin-PH right 1  | 0 | 0 |
| hugin-PH right 2  | 0 | 0 |
| hugin-PH left 1   | 0 | 0 |
| hugin-PH left 2   | 0 | 0 |

4.

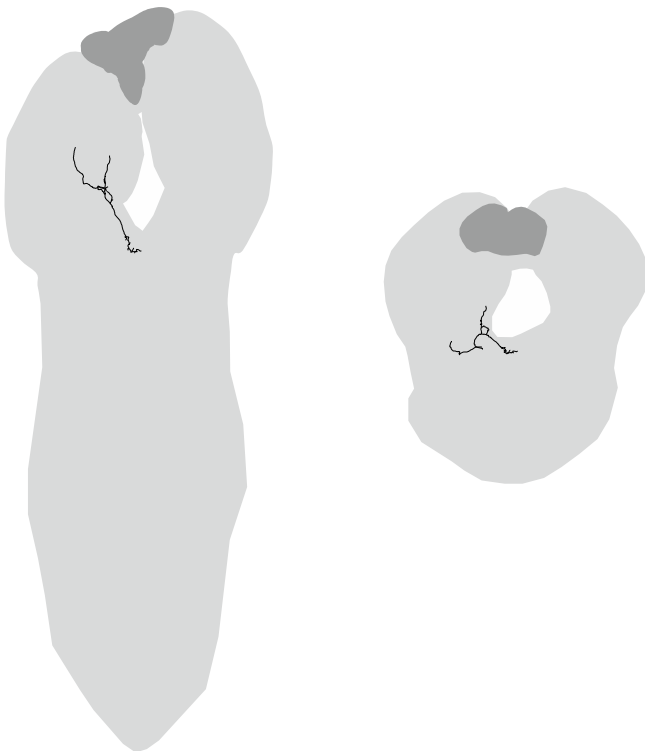

synapses to      synapses from

|                   |   |   |
|-------------------|---|---|
| hugin-PC right 1  | 0 | 0 |
| hugin-PC right 2  | 0 | 0 |
| hugin-PC right 3  | 0 | 0 |
| hugin-PC right 4  | 0 | 0 |
| hugin-PC left 1   | 0 | 0 |
| hugin-PC left 2   | 0 | 0 |
| hugin-PC left 3   | 1 | 0 |
| hugin-PC left 4   | 0 | 0 |
| hugin-RG right 1  | 1 | 0 |
| hugin-RG right 2  | 0 | 0 |
| hugin-RG left 1   | 2 | 0 |
| hugin-RG left 2   | 0 | 0 |
| hugin-VNC right 1 | 0 | 0 |
| hugin-VNC right 2 | 0 | 0 |
| hugin-VNC left 1  | 0 | 0 |
| hugin-VNC left 2  | 0 | 0 |
| hugin-PH right 1  | 0 | 0 |
| hugin-PH right 2  | 0 | 0 |
| hugin-PH left 1   | 0 | 0 |
| hugin-PH left 2   | 0 | 0 |

5.

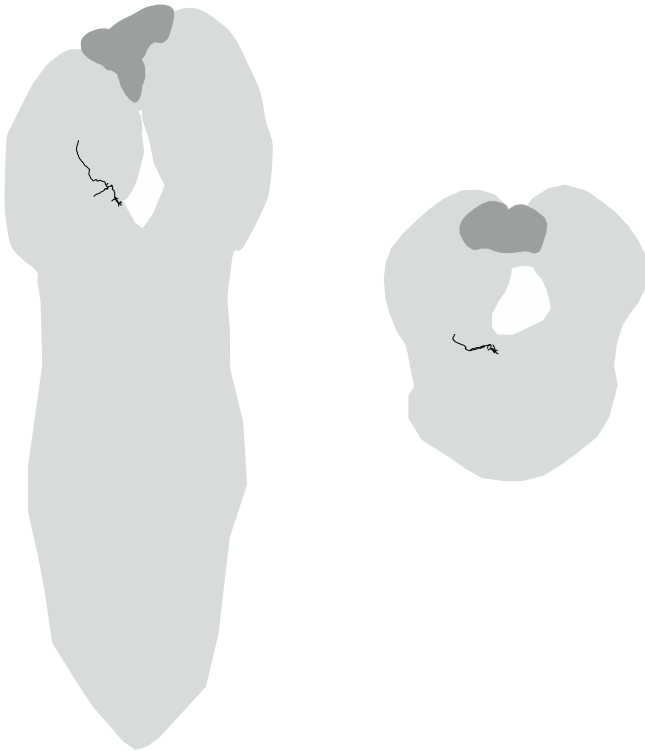

synapses to

synapses from

|                   |   |   |
|-------------------|---|---|
| hugin-PC right 1  | 0 | 0 |
| hugin-PC right 2  | 0 | 0 |
| hugin-PC right 3  | 0 | 0 |
| hugin-PC right 4  | 0 | 0 |
| hugin-PC left 1   | 0 | 0 |
| hugin-PC left 2   | 0 | 0 |
| hugin-PC left 3   | 0 | 0 |
| hugin-PC left 4   | 0 | 2 |
| hugin-RG right 1  | 0 | 0 |
| hugin-RG right 2  | 0 | 0 |
| hugin-RG left 1   | 0 | 0 |
| hugin-RG left 2   | 0 | 0 |
| hugin-VNC right 1 | 0 | 0 |
| hugin-VNC right 2 | 1 | 0 |
| hugin-VNC left 1  | 0 | 0 |
| hugin-VNC left 2  | 0 | 0 |
| hugin-PH right 1  | 0 | 0 |
| hugin-PH right 2  | 0 | 0 |
| hugin-PH left 1   | 0 | 0 |
| hugin-PH left 2   | 0 | 0 |

6.

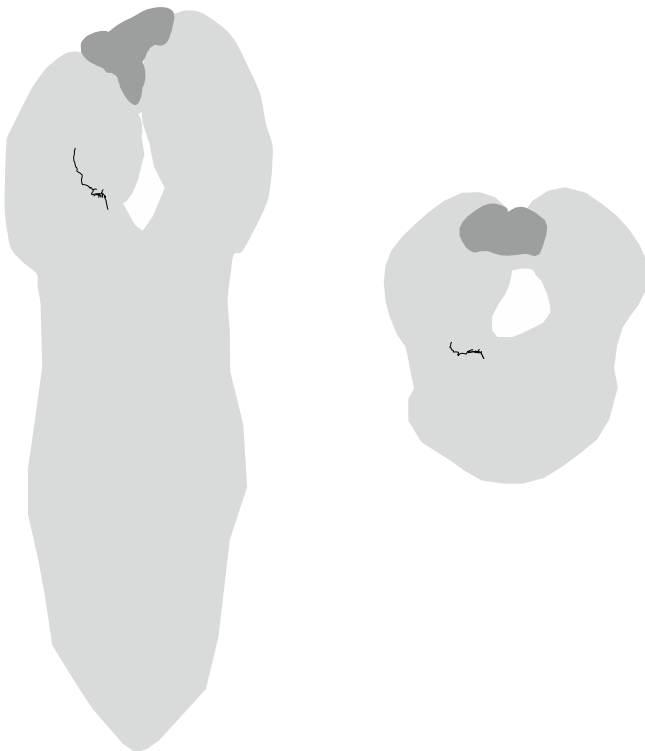

synapses to

synapses from

|                   |   |   |
|-------------------|---|---|
| hugin-PC right 1  | 0 | 0 |
| hugin-PC right 2  | 0 | 0 |
| hugin-PC right 3  | 0 | 0 |
| hugin-PC right 4  | 0 | 0 |
| hugin-PC left 1   | 3 | 0 |
| hugin-PC left 2   | 0 | 0 |
| hugin-PC left 3   | 0 | 0 |
| hugin-PC left 4   | 2 | 0 |
| hugin-RG right 1  | 0 | 0 |
| hugin-RG right 2  | 0 | 0 |
| hugin-RG left 1   | 0 | 0 |
| hugin-RG left 2   | 0 | 0 |
| hugin-VNC right 1 | 0 | 0 |
| hugin-VNC right 2 | 0 | 0 |
| hugin-VNC left 1  | 0 | 0 |
| hugin-VNC left 2  | 0 | 0 |
| hugin-PH right 1  | 0 | 0 |
| hugin-PH right 2  | 0 | 0 |
| hugin-PH left 1   | 0 | 0 |
| hugin-PH left 2   | 0 | 0 |



7.

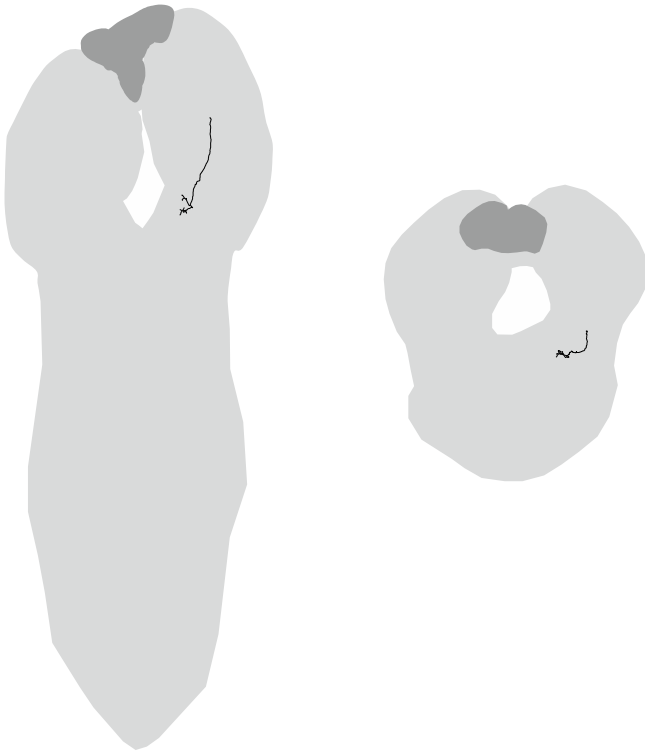

synapses to

synapses from

|                   |   |   |
|-------------------|---|---|
| hugin-PC right 1  | 0 | 0 |
| hugin-PC right 2  | 0 | 0 |
| hugin-PC right 3  | 0 | 0 |
| hugin-PC right 4  | 2 | 0 |
| hugin-PC left 1   | 0 | 0 |
| hugin-PC left 2   | 0 | 0 |
| hugin-PC left 3   | 0 | 0 |
| hugin-PC left 4   | 0 | 0 |
| hugin-RG right 1  | 0 | 0 |
| hugin-RG right 2  | 0 | 0 |
| hugin-RG left 1   | 0 | 0 |
| hugin-RG left 2   | 0 | 0 |
| hugin-VNC right 1 | 0 | 0 |
| hugin-VNC right 2 | 0 | 0 |
| hugin-VNC left 1  | 0 | 0 |
| hugin-VNC left 2  | 0 | 0 |
| hugin-PH right 1  | 0 | 0 |
| hugin-PH right 2  | 0 | 0 |
| hugin-PH left 1   | 0 | 0 |
| hugin-PH left 2   | 0 | 0 |

8.

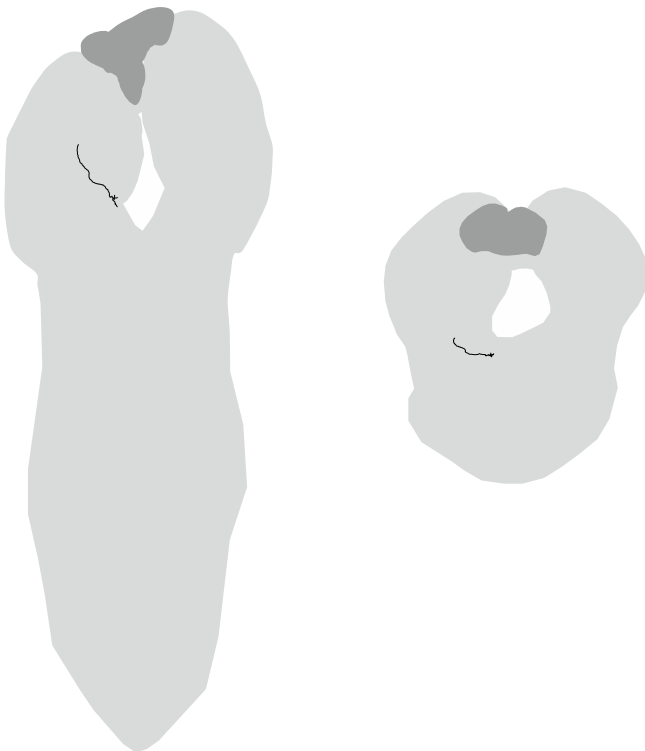

synapses to

synapses from

|                   |   |   |
|-------------------|---|---|
| hugin-PC right 1  | 0 | 0 |
| hugin-PC right 2  | 0 | 0 |
| hugin-PC right 3  | 0 | 0 |
| hugin-PC right 4  | 0 | 0 |
| hugin-PC left 1   | 4 | 0 |
| hugin-PC left 2   | 0 | 0 |
| hugin-PC left 3   | 0 | 0 |
| hugin-PC left 4   | 1 | 0 |
| hugin-RG right 1  | 0 | 0 |
| hugin-RG right 2  | 0 | 0 |
| hugin-RG left 1   | 0 | 0 |
| hugin-RG left 2   | 0 | 0 |
| hugin-VNC right 1 | 0 | 0 |
| hugin-VNC right 2 | 1 | 0 |
| hugin-VNC left 1  | 0 | 0 |
| hugin-VNC left 2  | 0 | 0 |
| hugin-PH right 1  | 0 | 0 |
| hugin-PH right 2  | 0 | 0 |
| hugin-PH left 1   | 0 | 0 |
| hugin-PH left 2   | 0 | 0 |

9.

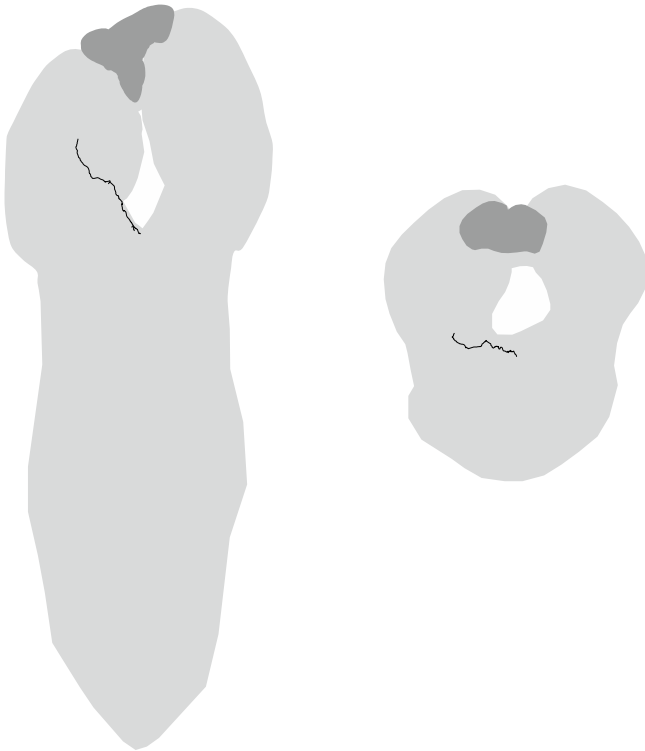

synapses to

synapses from

|                   |   |   |
|-------------------|---|---|
| hugin-PC right 1  | 0 | 0 |
| hugin-PC right 2  | 0 | 0 |
| hugin-PC right 3  | 0 | 0 |
| hugin-PC right 4  | 0 | 0 |
| hugin-PC left 1   | 0 | 0 |
| hugin-PC left 2   | 1 | 0 |
| hugin-PC left 3   | 2 | 0 |
| hugin-PC left 4   | 0 | 0 |
| hugin-RG right 1  | 0 | 0 |
| hugin-RG right 2  | 0 | 0 |
| hugin-RG left 1   | 0 | 0 |
| hugin-RG left 2   | 0 | 0 |
| hugin-VNC right 1 | 2 | 0 |
| hugin-VNC right 2 | 6 | 0 |
| hugin-VNC left 1  | 2 | 0 |
| hugin-VNC left 2  | 0 | 0 |
| hugin-PH right 1  | 0 | 0 |
| hugin-PH right 2  | 0 | 0 |
| hugin-PH left 1   | 0 | 0 |
| hugin-PH left 2   | 0 | 0 |

10.

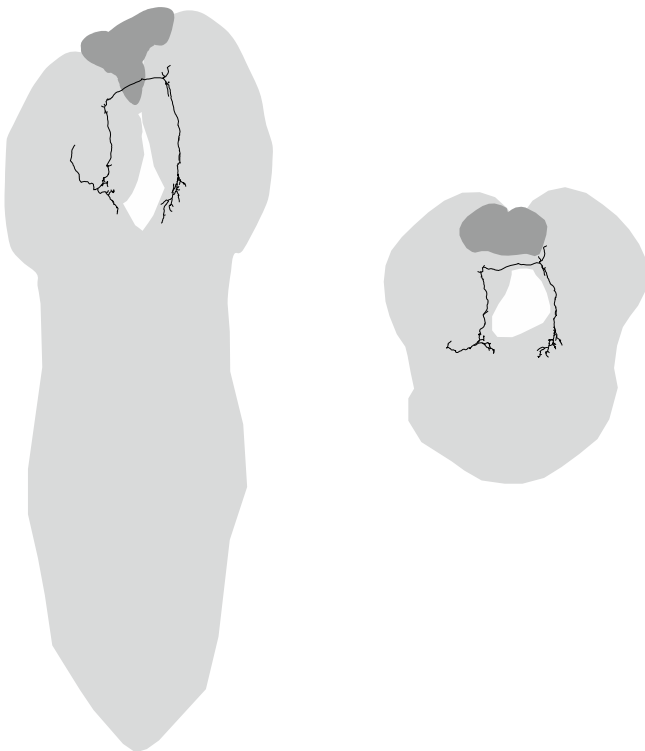

synapses to

synapses from

|                   |   |   |
|-------------------|---|---|
| hugin-PC right 1  | 1 | 1 |
| hugin-PC right 2  | 0 | 1 |
| hugin-PC right 3  | 1 | 0 |
| hugin-PC right 4  | 2 | 0 |
| hugin-PC left 1   | 1 | 0 |
| hugin-PC left 2   | 0 | 0 |
| hugin-PC left 3   | 1 | 1 |
| hugin-PC left 4   | 7 | 0 |
| hugin-RG right 1  | 0 | 0 |
| hugin-RG right 2  | 0 | 0 |
| hugin-RG left 1   | 0 | 0 |
| hugin-RG left 2   | 0 | 0 |
| hugin-VNC right 1 | 0 | 0 |
| hugin-VNC right 2 | 0 | 0 |
| hugin-VNC left 1  | 0 | 0 |
| hugin-VNC left 2  | 0 | 0 |
| hugin-PH right 1  | 0 | 0 |
| hugin-PH right 2  | 0 | 0 |
| hugin-PH left 1   | 0 | 0 |
| hugin-PH left 2   | 0 | 0 |

11.

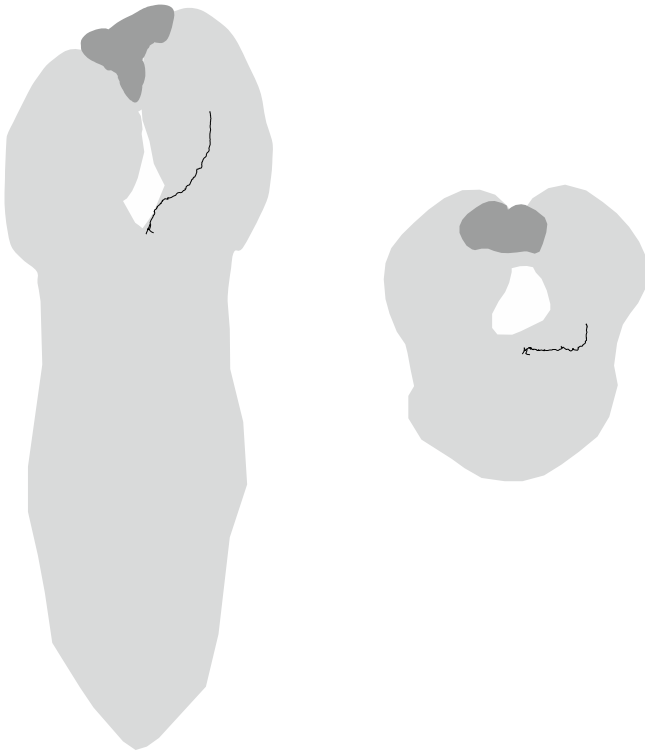

synapses to

synapses from

|                   |   |   |
|-------------------|---|---|
| hugin-PC right 1  | 0 | 0 |
| hugin-PC right 2  | 0 | 0 |
| hugin-PC right 3  | 0 | 0 |
| hugin-PC right 4  | 0 | 0 |
| hugin-PC left 1   | 0 | 0 |
| hugin-PC left 2   | 0 | 0 |
| hugin-PC left 3   | 0 | 0 |
| hugin-PC left 4   | 0 | 0 |
| hugin-RG right 1  | 0 | 0 |
| hugin-RG right 2  | 0 | 0 |
| hugin-RG left 1   | 0 | 0 |
| hugin-RG left 2   | 0 | 0 |
| hugin-VNC right 1 | 0 | 0 |
| hugin-VNC right 2 | 0 | 0 |
| hugin-VNC left 1  | 0 | 0 |
| hugin-VNC left 2  | 2 | 0 |
| hugin-PH right 1  | 0 | 0 |
| hugin-PH right 2  | 0 | 0 |
| hugin-PH left 1   | 0 | 0 |
| hugin-PH left 2   | 0 | 0 |

12.

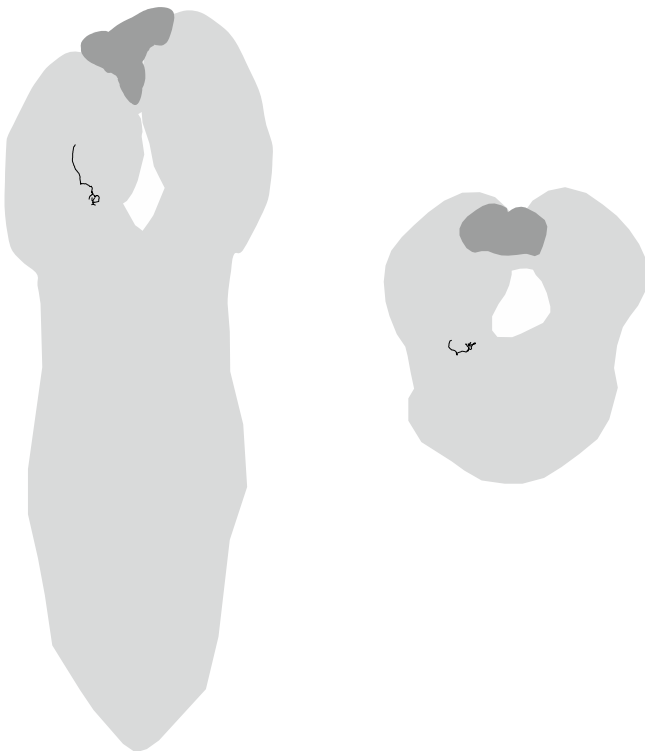

synapses to

synapses from

|                   |   |   |
|-------------------|---|---|
| hugin-PC right 1  | 0 | 0 |
| hugin-PC right 2  | 0 | 0 |
| hugin-PC right 3  | 0 | 0 |
| hugin-PC right 4  | 0 | 0 |
| hugin-PC left 1   | 3 | 0 |
| hugin-PC left 2   | 0 | 0 |
| hugin-PC left 3   | 0 | 0 |
| hugin-PC left 4   | 0 | 0 |
| hugin-RG right 1  | 0 | 0 |
| hugin-RG right 2  | 0 | 0 |
| hugin-RG left 1   | 0 | 0 |
| hugin-RG left 2   | 0 | 0 |
| hugin-VNC right 1 | 0 | 0 |
| hugin-VNC right 2 | 0 | 0 |
| hugin-VNC left 1  | 0 | 0 |
| hugin-VNC left 2  | 0 | 0 |
| hugin-PH right 1  | 0 | 0 |
| hugin-PH right 2  | 0 | 0 |
| hugin-PH left 1   | 0 | 0 |
| hugin-PH left 2   | 0 | 0 |

13.

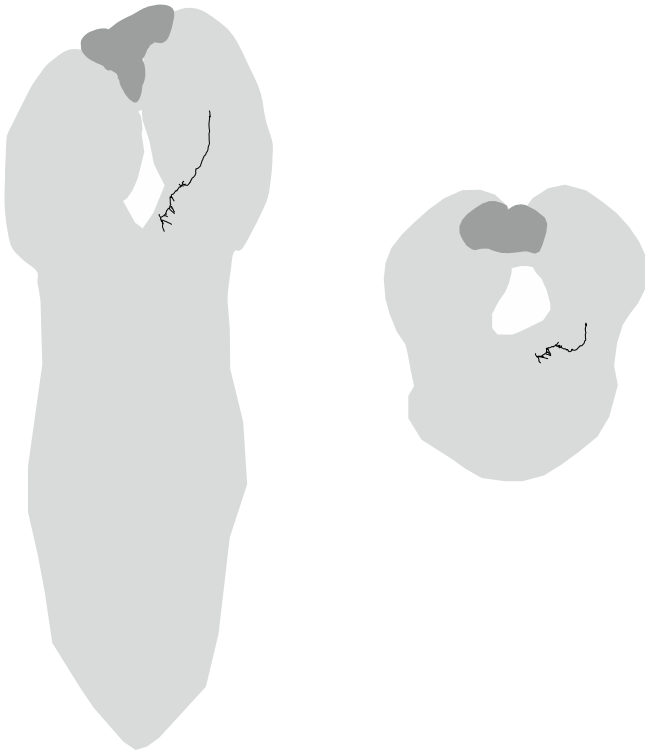

synapses to

synapses from

|                   |   |   |
|-------------------|---|---|
| hugin-PC right 1  | 3 | 1 |
| hugin-PC right 2  | 1 | 0 |
| hugin-PC right 3  | 0 | 0 |
| hugin-PC right 4  | 3 | 1 |
| hugin-PC left 1   | 0 | 0 |
| hugin-PC left 2   | 0 | 0 |
| hugin-PC left 3   | 0 | 0 |
| hugin-PC left 4   | 0 | 0 |
| hugin-RG right 1  | 0 | 0 |
| hugin-RG right 2  | 0 | 0 |
| hugin-RG left 1   | 0 | 0 |
| hugin-RG left 2   | 0 | 0 |
| hugin-VNC right 1 | 0 | 0 |
| hugin-VNC right 2 | 0 | 0 |
| hugin-VNC left 1  | 0 | 0 |
| hugin-VNC left 2  | 0 | 0 |
| hugin-PH right 1  | 0 | 0 |
| hugin-PH right 2  | 0 | 0 |
| hugin-PH left 1   | 0 | 0 |
| hugin-PH left 2   | 0 | 0 |

14.

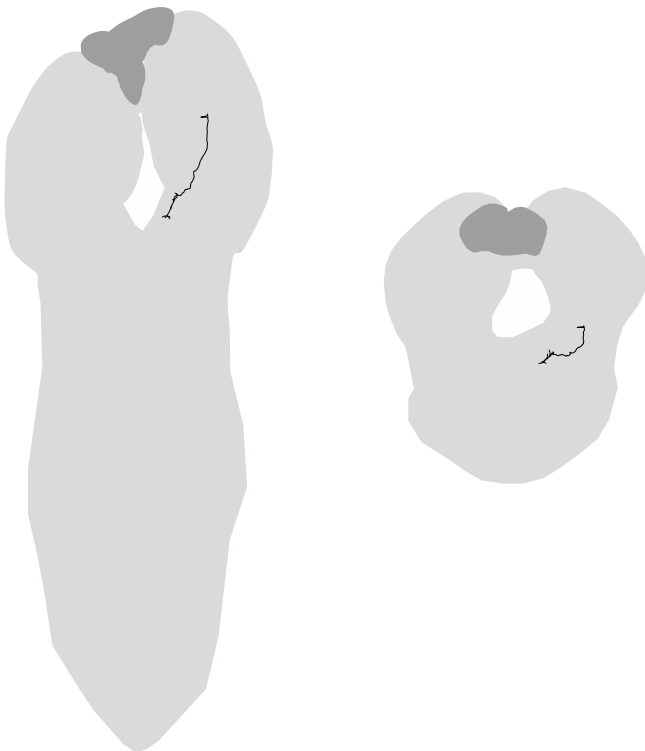

synapses to

synapses from

|                   |   |   |
|-------------------|---|---|
| hugin-PC right 1  | 1 | 0 |
| hugin-PC right 2  | 0 | 0 |
| hugin-PC right 3  | 2 | 0 |
| hugin-PC right 4  | 1 | 0 |
| hugin-PC left 1   | 0 | 0 |
| hugin-PC left 2   | 0 | 0 |
| hugin-PC left 3   | 0 | 0 |
| hugin-PC left 4   | 0 | 0 |
| hugin-RG right 1  | 0 | 0 |
| hugin-RG right 2  | 0 | 0 |
| hugin-RG left 1   | 0 | 0 |
| hugin-RG left 2   | 0 | 0 |
| hugin-VNC right 1 | 0 | 0 |
| hugin-VNC right 2 | 0 | 0 |
| hugin-VNC left 1  | 0 | 0 |
| hugin-VNC left 2  | 0 | 0 |
| hugin-PH right 1  | 0 | 0 |
| hugin-PH right 2  | 0 | 0 |
| hugin-PH left 1   | 0 | 0 |
| hugin-PH left 2   | 0 | 0 |

15.

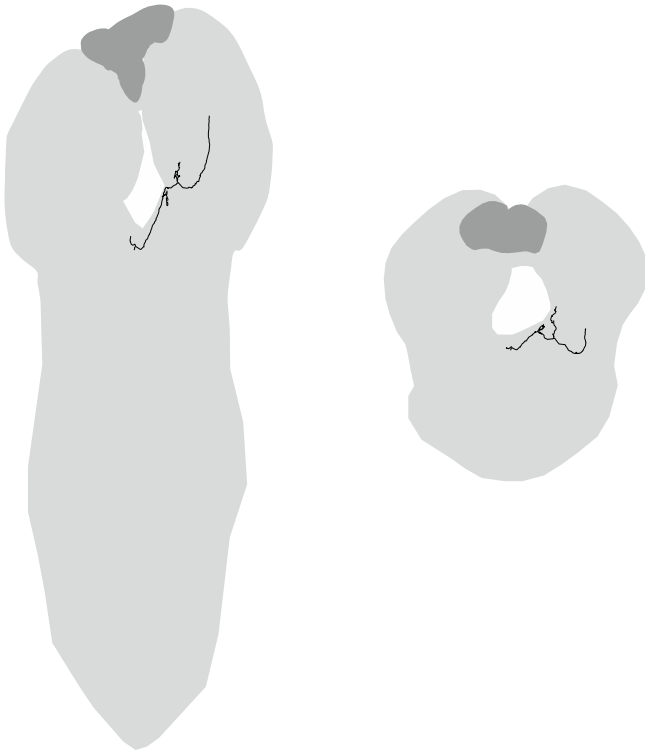

synapses to

synapses from

|                   |   |   |
|-------------------|---|---|
| hugin-PC right 1  | 0 | 0 |
| hugin-PC right 2  | 0 | 0 |
| hugin-PC right 3  | 0 | 0 |
| hugin-PC right 4  | 0 | 0 |
| hugin-PC left 1   | 0 | 0 |
| hugin-PC left 2   | 0 | 0 |
| hugin-PC left 3   | 0 | 0 |
| hugin-PC left 4   | 0 | 0 |
| hugin-RG right 1  | 0 | 0 |
| hugin-RG right 2  | 0 | 0 |
| hugin-RG left 1   | 0 | 0 |
| hugin-RG left 2   | 1 | 0 |
| hugin-VNC right 1 | 0 | 0 |
| hugin-VNC right 2 | 1 | 0 |
| hugin-VNC left 1  | 0 | 0 |
| hugin-VNC left 2  | 0 | 0 |
| hugin-PH right 1  | 0 | 0 |
| hugin-PH right 2  | 0 | 0 |
| hugin-PH left 1   | 0 | 0 |
| hugin-PH left 2   | 0 | 0 |

16.

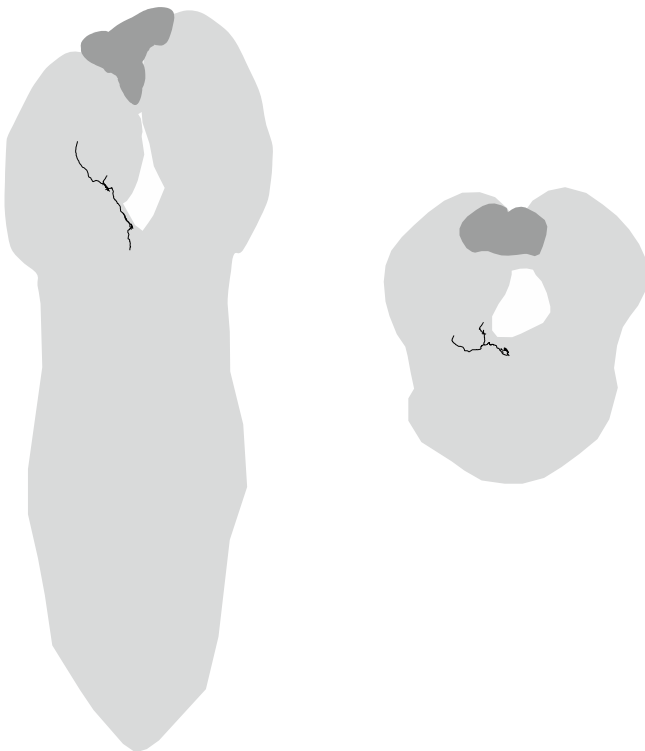

synapses to

synapses from

|                   |   |   |
|-------------------|---|---|
| hugin-PC right 1  | 0 | 0 |
| hugin-PC right 2  | 0 | 0 |
| hugin-PC right 3  | 0 | 0 |
| hugin-PC right 4  | 0 | 0 |
| hugin-PC left 1   | 0 | 0 |
| hugin-PC left 2   | 0 | 0 |
| hugin-PC left 3   | 0 | 0 |
| hugin-PC left 4   | 0 | 0 |
| hugin-RG right 1  | 0 | 0 |
| hugin-RG right 2  | 0 | 0 |
| hugin-RG left 1   | 0 | 0 |
| hugin-RG left 2   | 0 | 0 |
| hugin-VNC right 1 | 2 | 1 |
| hugin-VNC right 2 | 0 | 0 |
| hugin-VNC left 1  | 1 | 0 |
| hugin-VNC left 2  | 0 | 0 |
| hugin-PH right 1  | 0 | 0 |
| hugin-PH right 2  | 0 | 0 |
| hugin-PH left 1   | 0 | 0 |
| hugin-PH left 2   | 0 | 0 |

17.

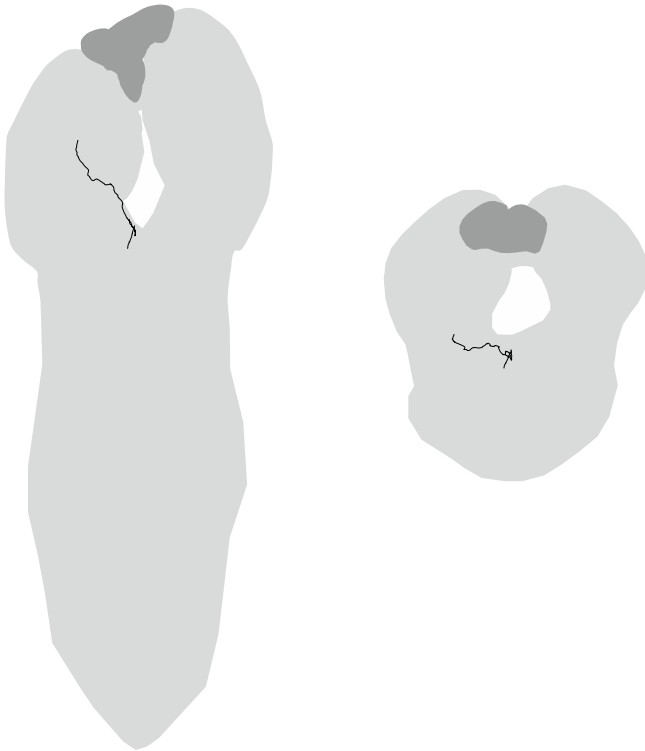

synapses to

synapses from

|                   |   |   |
|-------------------|---|---|
| hugin-PC right 1  | 0 | 0 |
| hugin-PC right 2  | 0 | 0 |
| hugin-PC right 3  | 0 | 0 |
| hugin-PC right 4  | 0 | 0 |
| hugin-PC left 1   | 2 | 0 |
| hugin-PC left 2   | 2 | 0 |
| hugin-PC left 3   | 2 | 0 |
| hugin-PC left 4   | 0 | 0 |
| hugin-RG right 1  | 0 | 0 |
| hugin-RG right 2  | 0 | 0 |
| hugin-RG left 1   | 0 | 0 |
| hugin-RG left 2   | 0 | 0 |
| hugin-VNC right 1 | 0 | 0 |
| hugin-VNC right 2 | 1 | 0 |
| hugin-VNC left 1  | 1 | 0 |
| hugin-VNC left 2  | 0 | 0 |
| hugin-PH right 1  | 0 | 0 |
| hugin-PH right 2  | 0 | 0 |
| hugin-PH left 1   | 0 | 0 |
| hugin-PH left 2   | 0 | 0 |

18.

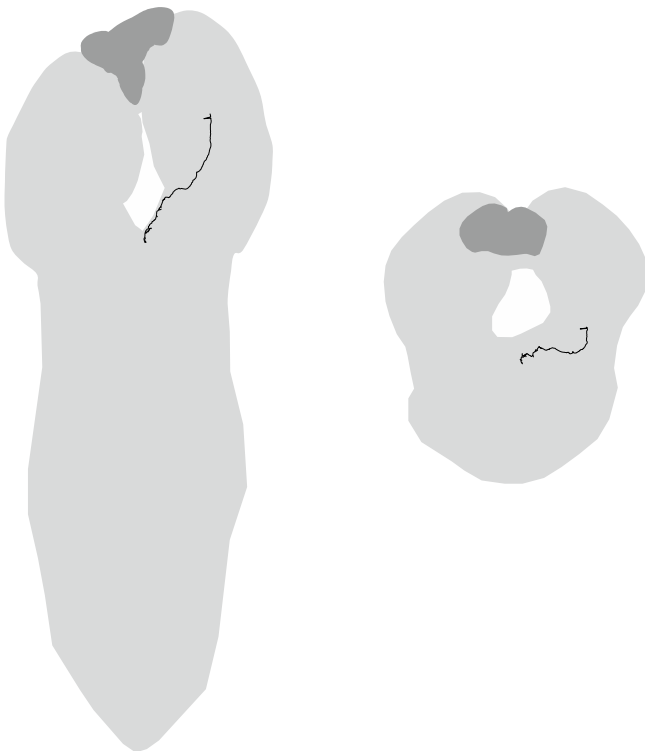

synapses to

synapses from

|                   |   |   |
|-------------------|---|---|
| hugin-PC right 1  | 3 | 0 |
| hugin-PC right 2  | 0 | 0 |
| hugin-PC right 3  | 0 | 0 |
| hugin-PC right 4  | 0 | 0 |
| hugin-PC left 1   | 0 | 0 |
| hugin-PC left 2   | 0 | 0 |
| hugin-PC left 3   | 0 | 0 |
| hugin-PC left 4   | 0 | 0 |
| hugin-RG right 1  | 0 | 0 |
| hugin-RG right 2  | 0 | 0 |
| hugin-RG left 1   | 0 | 0 |
| hugin-RG left 2   | 0 | 0 |
| hugin-VNC right 1 | 0 | 0 |
| hugin-VNC right 2 | 0 | 0 |
| hugin-VNC left 1  | 0 | 0 |
| hugin-VNC left 2  | 2 | 0 |
| hugin-PH right 1  | 0 | 0 |
| hugin-PH right 2  | 0 | 0 |
| hugin-PH left 1   | 0 | 0 |
| hugin-PH left 2   | 0 | 0 |

19.

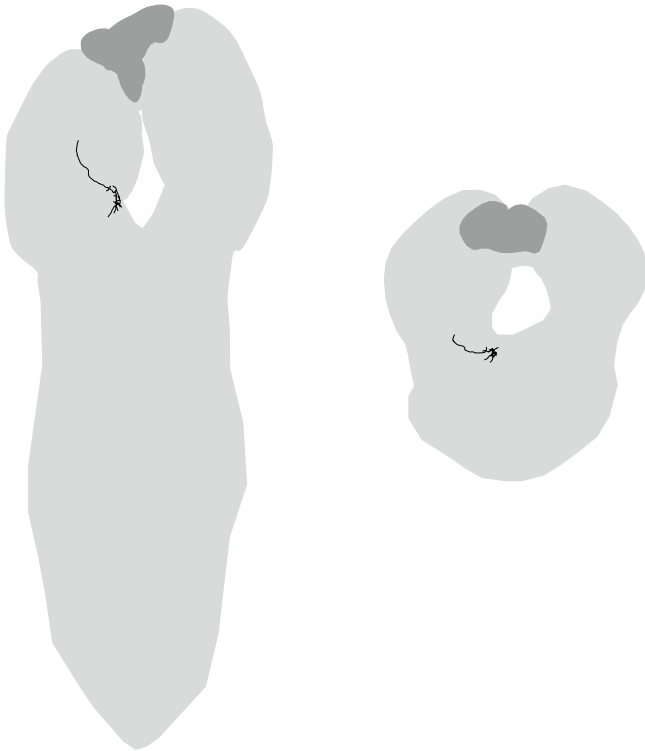

synapses to

synapses from

|                   |   |   |
|-------------------|---|---|
| hugin-PC right 1  | 0 | 0 |
| hugin-PC right 2  | 0 | 0 |
| hugin-PC right 3  | 0 | 0 |
| hugin-PC right 4  | 0 | 0 |
| hugin-PC left 1   | 1 | 0 |
| hugin-PC left 2   | 0 | 0 |
| hugin-PC left 3   | 2 | 0 |
| hugin-PC left 4   | 2 | 0 |
| hugin-RG right 1  | 0 | 0 |
| hugin-RG right 2  | 0 | 0 |
| hugin-RG left 1   | 0 | 0 |
| hugin-RG left 2   | 0 | 0 |
| hugin-VNC right 1 | 0 | 0 |
| hugin-VNC right 2 | 0 | 0 |
| hugin-VNC left 1  | 0 | 0 |
| hugin-VNC left 2  | 0 | 0 |
| hugin-PH right 1  | 0 | 0 |
| hugin-PH right 2  | 0 | 0 |
| hugin-PH left 1   | 0 | 0 |
| hugin-PH left 2   | 0 | 0 |

20.

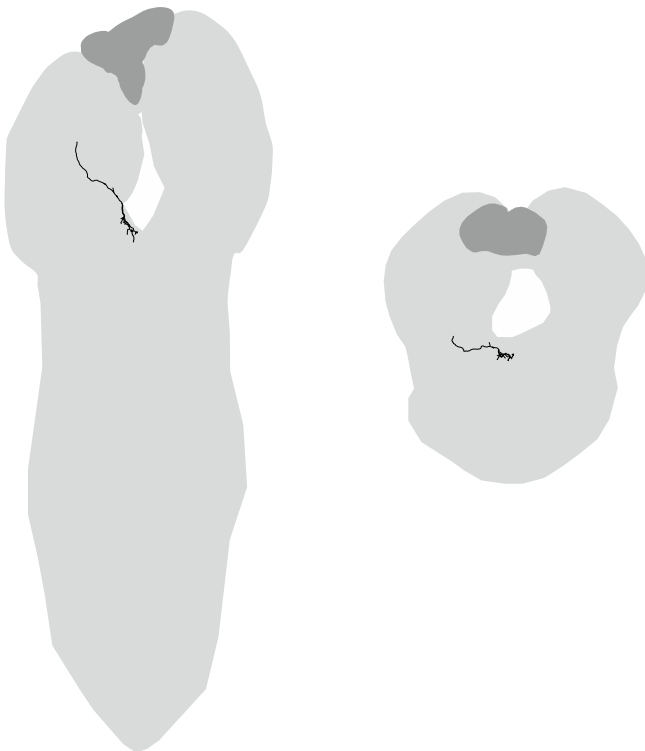

synapses to

synapses from

|                   |   |   |
|-------------------|---|---|
| hugin-PC right 1  | 0 | 0 |
| hugin-PC right 2  | 0 | 0 |
| hugin-PC right 3  | 0 | 0 |
| hugin-PC right 4  | 0 | 0 |
| hugin-PC left 1   | 1 | 0 |
| hugin-PC left 2   | 1 | 0 |
| hugin-PC left 3   | 0 | 0 |
| hugin-PC left 4   | 3 | 0 |
| hugin-RG right 1  | 0 | 0 |
| hugin-RG right 2  | 0 | 0 |
| hugin-RG left 1   | 0 | 0 |
| hugin-RG left 2   | 0 | 0 |
| hugin-VNC right 1 | 3 | 0 |
| hugin-VNC right 2 | 0 | 0 |
| hugin-VNC left 1  | 1 | 0 |
| hugin-VNC left 2  | 0 | 0 |
| hugin-PH right 1  | 0 | 0 |
| hugin-PH right 2  | 0 | 0 |
| hugin-PH left 1   | 0 | 0 |
| hugin-PH left 2   | 0 | 0 |

21.

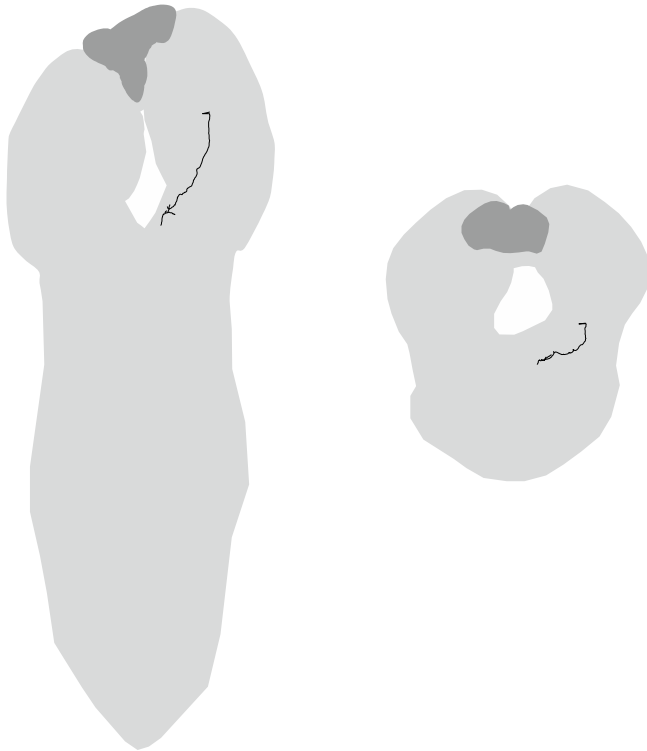

synapses to

synapses from

|                   |   |   |
|-------------------|---|---|
| hugin-PC right 1  | 2 | 0 |
| hugin-PC right 2  | 1 | 0 |
| hugin-PC right 3  | 3 | 0 |
| hugin-PC right 4  | 0 | 0 |
| hugin-PC left 1   | 0 | 0 |
| hugin-PC left 2   | 0 | 0 |
| hugin-PC left 3   | 0 | 0 |
| hugin-PC left 4   | 0 | 0 |
| hugin-RG right 1  | 0 | 0 |
| hugin-RG right 2  | 0 | 0 |
| hugin-RG left 1   | 0 | 0 |
| hugin-RG left 2   | 0 | 0 |
| hugin-VNC right 1 | 0 | 0 |
| hugin-VNC right 2 | 0 | 0 |
| hugin-VNC left 1  | 0 | 0 |
| hugin-VNC left 2  | 0 | 0 |
| hugin-PH right 1  | 0 | 0 |
| hugin-PH right 2  | 0 | 0 |
| hugin-PH left 1   | 0 | 0 |
| hugin-PH left 2   | 0 | 0 |

22.

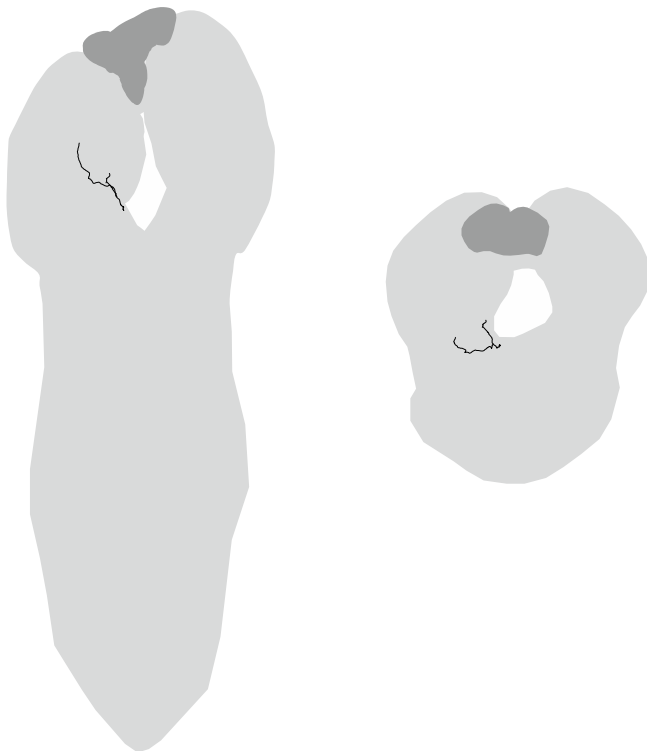

synapses to

synapses from

|                   |   |   |
|-------------------|---|---|
| hugin-PC right 1  | 0 | 0 |
| hugin-PC right 2  | 0 | 0 |
| hugin-PC right 3  | 0 | 0 |
| hugin-PC right 4  | 0 | 0 |
| hugin-PC left 1   | 0 | 0 |
| hugin-PC left 2   | 0 | 0 |
| hugin-PC left 3   | 0 | 0 |
| hugin-PC left 4   | 0 | 0 |
| hugin-RG right 1  | 0 | 0 |
| hugin-RG right 2  | 0 | 0 |
| hugin-RG left 1   | 0 | 0 |
| hugin-RG left 2   | 0 | 0 |
| hugin-VNC right 1 | 3 | 0 |
| hugin-VNC right 2 | 1 | 0 |
| hugin-VNC left 1  | 3 | 0 |
| hugin-VNC left 2  | 0 | 0 |
| hugin-PH right 1  | 0 | 0 |
| hugin-PH right 2  | 0 | 0 |
| hugin-PH left 1   | 0 | 0 |
| hugin-PH left 2   | 0 | 0 |



23.

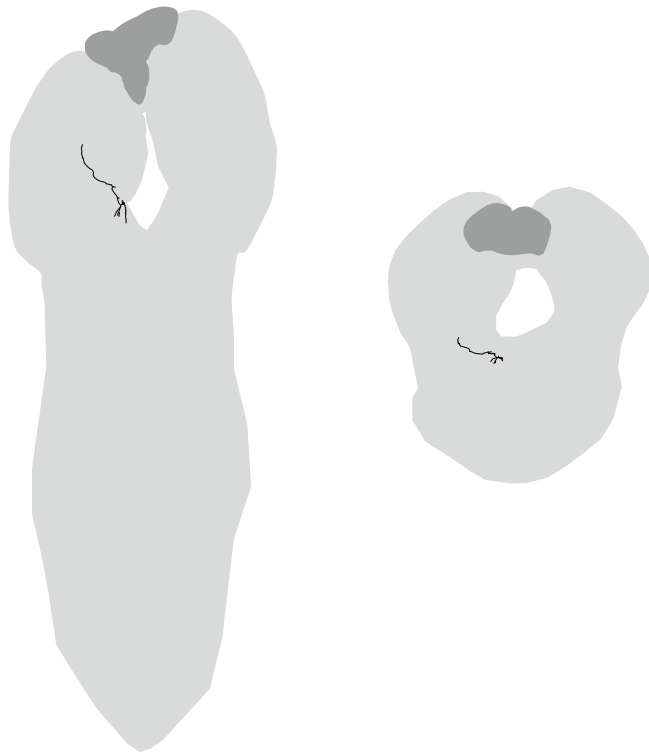

synapses to

synapses from

|                   |   |   |
|-------------------|---|---|
| hugin-PC right 1  | 0 | 0 |
| hugin-PC right 2  | 0 | 0 |
| hugin-PC right 3  | 0 | 0 |
| hugin-PC right 4  | 0 | 0 |
| hugin-PC left 1   | 1 | 0 |
| hugin-PC left 2   | 0 | 0 |
| hugin-PC left 3   | 2 | 0 |
| hugin-PC left 4   | 1 | 0 |
| hugin-RG right 1  | 0 | 0 |
| hugin-RG right 2  | 0 | 0 |
| hugin-RG left 1   | 0 | 0 |
| hugin-RG left 2   | 0 | 0 |
| hugin-VNC right 1 | 0 | 0 |
| hugin-VNC right 2 | 0 | 0 |
| hugin-VNC left 1  | 0 | 0 |
| hugin-VNC left 2  | 0 | 0 |
| hugin-PH right 1  | 0 | 0 |
| hugin-PH right 2  | 0 | 0 |
| hugin-PH left 1   | 0 | 0 |
| hugin-PH left 2   | 0 | 0 |

24.

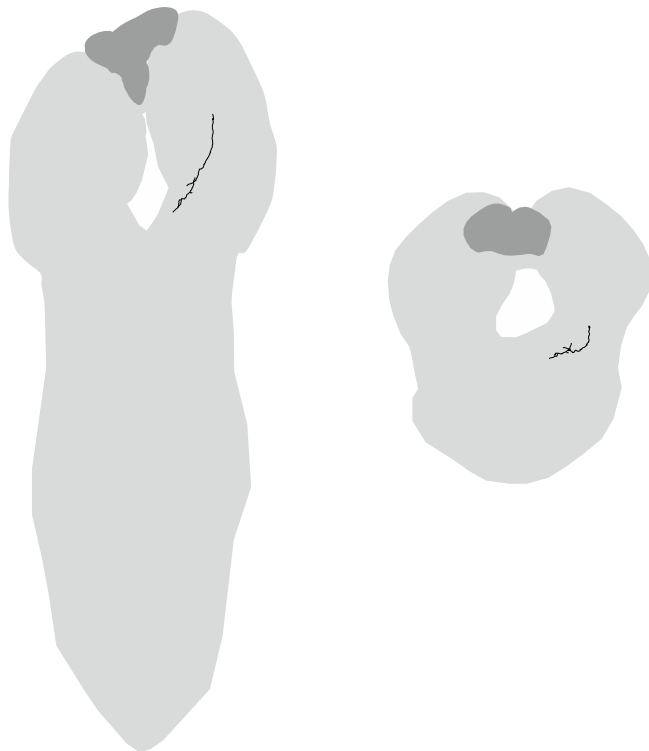

synapses to

synapses from

|                   |   |   |
|-------------------|---|---|
| hugin-PC right 1  | 0 | 0 |
| hugin-PC right 2  | 0 | 0 |
| hugin-PC right 3  | 0 | 0 |
| hugin-PC right 4  | 2 | 0 |
| hugin-PC left 1   | 0 | 0 |
| hugin-PC left 2   | 0 | 0 |
| hugin-PC left 3   | 0 | 0 |
| hugin-PC left 4   | 0 | 0 |
| hugin-RG right 1  | 0 | 0 |
| hugin-RG right 2  | 0 | 0 |
| hugin-RG left 1   | 0 | 0 |
| hugin-RG left 2   | 0 | 0 |
| hugin-VNC right 1 | 0 | 0 |
| hugin-VNC right 2 | 0 | 0 |
| hugin-VNC left 1  | 0 | 0 |
| hugin-VNC left 2  | 0 | 0 |
| hugin-PH right 1  | 0 | 0 |
| hugin-PH right 2  | 0 | 0 |
| hugin-PH left 1   | 0 | 0 |
| hugin-PH left 2   | 0 | 0 |

25.

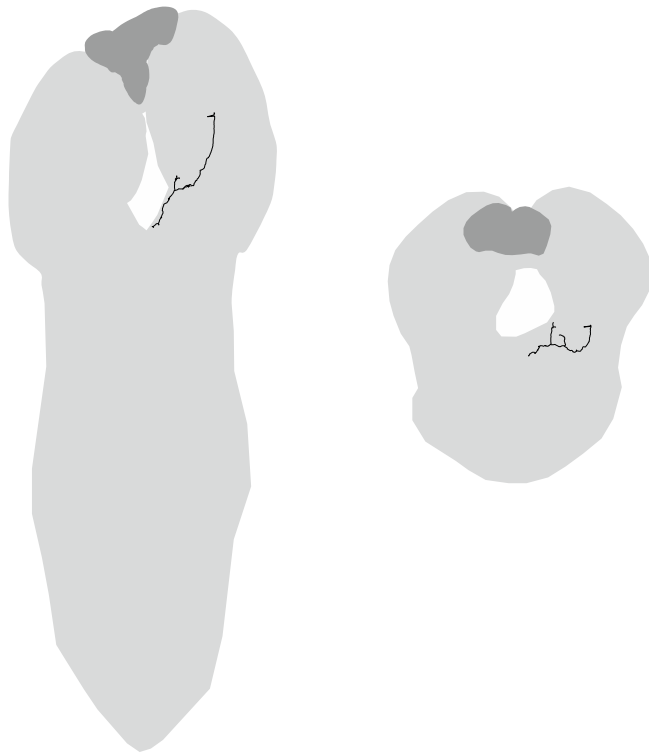

synapses to

synapses from

|                   |   |   |
|-------------------|---|---|
| hugin-PC right 1  | 0 | 0 |
| hugin-PC right 2  | 0 | 0 |
| hugin-PC right 3  | 1 | 0 |
| hugin-PC right 4  | 0 | 0 |
| hugin-PC left 1   | 0 | 0 |
| hugin-PC left 2   | 0 | 0 |
| hugin-PC left 3   | 0 | 0 |
| hugin-PC left 4   | 0 | 0 |
| hugin-RG right 1  | 0 | 0 |
| hugin-RG right 2  | 0 | 0 |
| hugin-RG left 1   | 0 | 0 |
| hugin-RG left 2   | 0 | 0 |
| hugin-VNC right 1 | 0 | 0 |
| hugin-VNC right 2 | 0 | 0 |
| hugin-VNC left 1  | 0 | 0 |
| hugin-VNC left 2  | 1 | 0 |
| hugin-PH right 1  | 0 | 0 |
| hugin-PH right 2  | 0 | 0 |
| hugin-PH left 1   | 0 | 0 |
| hugin-PH left 2   | 0 | 0 |

26.

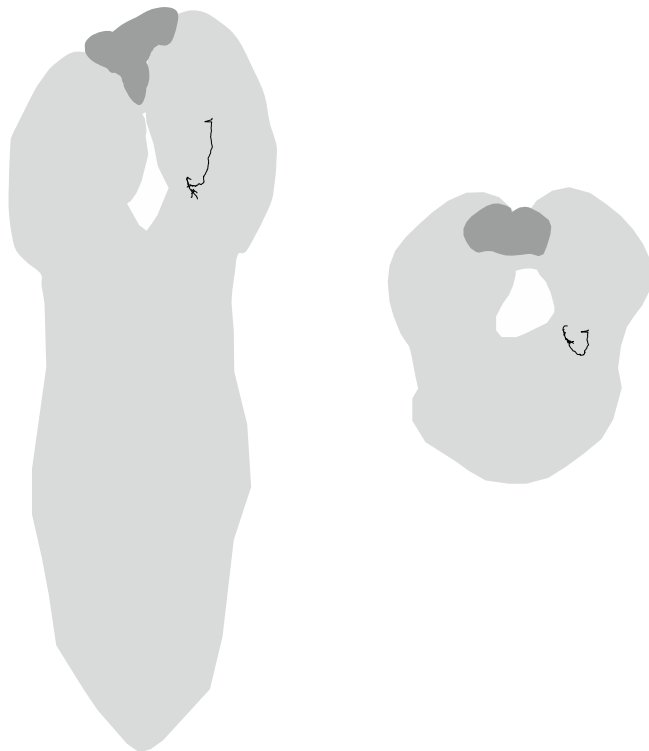

synapses to

synapses from

|                   |   |   |
|-------------------|---|---|
| hugin-PC right 1  | 0 | 0 |
| hugin-PC right 2  | 0 | 0 |
| hugin-PC right 3  | 6 | 0 |
| hugin-PC right 4  | 0 | 0 |
| hugin-PC left 1   | 0 | 0 |
| hugin-PC left 2   | 0 | 0 |
| hugin-PC left 3   | 0 | 0 |
| hugin-PC left 4   | 0 | 0 |
| hugin-RG right 1  | 0 | 0 |
| hugin-RG right 2  | 0 | 0 |
| hugin-RG left 1   | 0 | 0 |
| hugin-RG left 2   | 0 | 0 |
| hugin-VNC right 1 | 0 | 0 |
| hugin-VNC right 2 | 0 | 0 |
| hugin-VNC left 1  | 0 | 0 |
| hugin-VNC left 2  | 0 | 0 |
| hugin-PH right 1  | 0 | 0 |
| hugin-PH right 2  | 0 | 0 |
| hugin-PH left 1   | 0 | 0 |
| hugin-PH left 2   | 0 | 0 |

27.

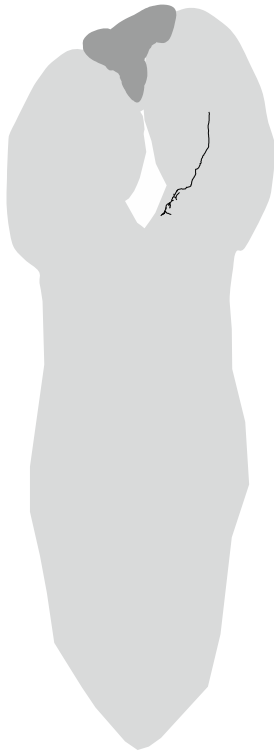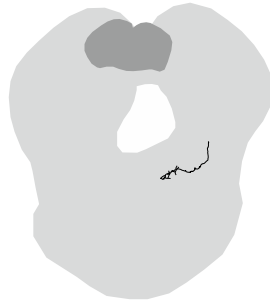

synapses to

synapses from

|                   |   |   |
|-------------------|---|---|
| hugin-PC right 1  | 3 | 0 |
| hugin-PC right 2  | 2 | 0 |
| hugin-PC right 3  | 1 | 0 |
| hugin-PC right 4  | 0 | 0 |
| hugin-PC left 1   | 0 | 0 |
| hugin-PC left 2   | 0 | 0 |
| hugin-PC left 3   | 0 | 0 |
| hugin-PC left 4   | 0 | 0 |
| hugin-RG right 1  | 0 | 0 |
| hugin-RG right 2  | 0 | 0 |
| hugin-RG left 1   | 0 | 0 |
| hugin-RG left 2   | 0 | 0 |
| hugin-VNC right 1 | 0 | 0 |
| hugin-VNC right 2 | 0 | 0 |
| hugin-VNC left 1  | 0 | 0 |
| hugin-VNC left 2  | 0 | 0 |
| hugin-PH right 1  | 0 | 0 |
| hugin-PH right 2  | 0 | 0 |
| hugin-PH left 1   | 0 | 0 |
| hugin-PH left 2   | 0 | 0 |

28.

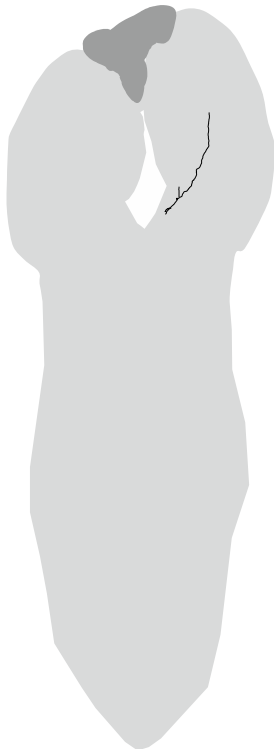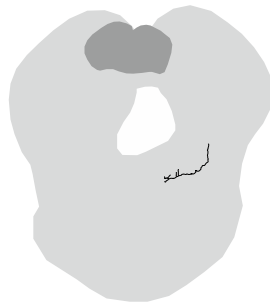

synapses to

synapses from

|                   |   |   |
|-------------------|---|---|
| hugin-PC right 1  | 1 | 0 |
| hugin-PC right 2  | 1 | 0 |
| hugin-PC right 3  | 0 | 0 |
| hugin-PC right 4  | 0 | 0 |
| hugin-PC left 1   | 0 | 0 |
| hugin-PC left 2   | 0 | 0 |
| hugin-PC left 3   | 0 | 0 |
| hugin-PC left 4   | 0 | 0 |
| hugin-RG right 1  | 0 | 0 |
| hugin-RG right 2  | 0 | 0 |
| hugin-RG left 1   | 0 | 0 |
| hugin-RG left 2   | 0 | 0 |
| hugin-VNC right 1 | 0 | 0 |
| hugin-VNC right 2 | 0 | 0 |
| hugin-VNC left 1  | 0 | 0 |
| hugin-VNC left 2  | 0 | 0 |
| hugin-PH right 1  | 0 | 0 |
| hugin-PH right 2  | 0 | 0 |
| hugin-PH left 1   | 0 | 0 |
| hugin-PH left 2   | 0 | 0 |

29.

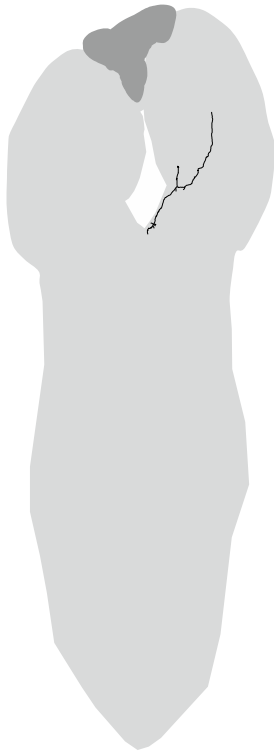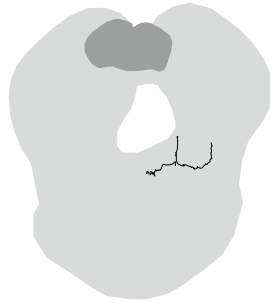

synapses to

synapses from

|                   |   |   |
|-------------------|---|---|
| hugin-PC right 1  | 1 | 1 |
| hugin-PC right 2  | 5 | 0 |
| hugin-PC right 3  | 0 | 0 |
| hugin-PC right 4  | 2 | 0 |
| hugin-PC left 1   | 0 | 0 |
| hugin-PC left 2   | 0 | 0 |
| hugin-PC left 3   | 0 | 0 |
| hugin-PC left 4   | 0 | 0 |
| hugin-RG right 1  | 0 | 0 |
| hugin-RG right 2  | 0 | 0 |
| hugin-RG left 1   | 0 | 0 |
| hugin-RG left 2   | 0 | 0 |
| hugin-VNC right 1 | 0 | 0 |
| hugin-VNC right 2 | 0 | 0 |
| hugin-VNC left 1  | 0 | 0 |
| hugin-VNC left 2  | 0 | 0 |
| hugin-PH right 1  | 0 | 0 |
| hugin-PH right 2  | 0 | 0 |
| hugin-PH left 1   | 0 | 0 |
| hugin-PH left 2   | 0 | 0 |

30.

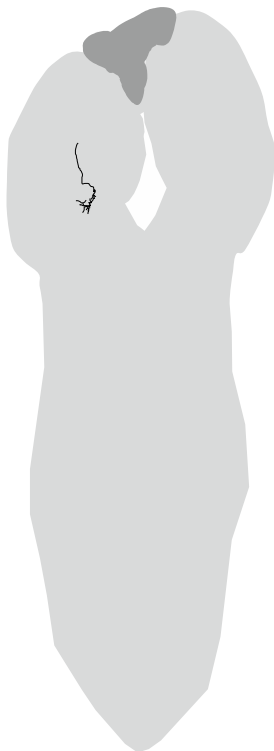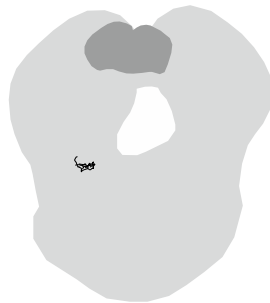

synapses to

synapses from

|                   |   |   |
|-------------------|---|---|
| hugin-PC right 1  | 0 | 0 |
| hugin-PC right 2  | 0 | 0 |
| hugin-PC right 3  | 0 | 0 |
| hugin-PC right 4  | 0 | 0 |
| hugin-PC left 1   | 3 | 0 |
| hugin-PC left 2   | 0 | 0 |
| hugin-PC left 3   | 0 | 0 |
| hugin-PC left 4   | 0 | 0 |
| hugin-RG right 1  | 0 | 0 |
| hugin-RG right 2  | 0 | 0 |
| hugin-RG left 1   | 0 | 0 |
| hugin-RG left 2   | 0 | 0 |
| hugin-VNC right 1 | 0 | 0 |
| hugin-VNC right 2 | 0 | 0 |
| hugin-VNC left 1  | 0 | 0 |
| hugin-VNC left 2  | 0 | 0 |
| hugin-PH right 1  | 0 | 0 |
| hugin-PH right 2  | 0 | 0 |
| hugin-PH left 1   | 0 | 0 |
| hugin-PH left 2   | 0 | 0 |

31.

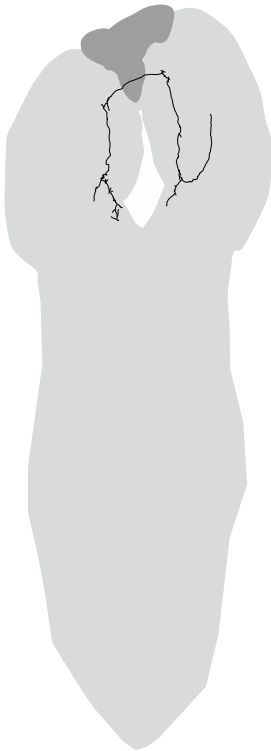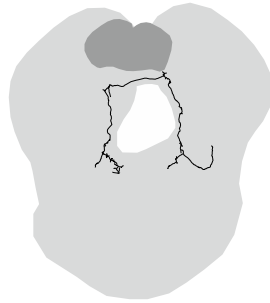

synapses to

synapses from

|                   |   |   |
|-------------------|---|---|
| hugin-PC right 1  | 1 | 0 |
| hugin-PC right 2  | 1 | 0 |
| hugin-PC right 3  | 4 | 0 |
| hugin-PC right 4  | 1 | 0 |
| hugin-PC left 1   | 0 | 0 |
| hugin-PC left 2   | 1 | 0 |
| hugin-PC left 3   | 0 | 1 |
| hugin-PC left 4   | 2 | 0 |
| hugin-RG right 1  | 0 | 0 |
| hugin-RG right 2  | 0 | 0 |
| hugin-RG left 1   | 0 | 0 |
| hugin-RG left 2   | 0 | 0 |
| hugin-VNC right 1 | 0 | 0 |
| hugin-VNC right 2 | 0 | 0 |
| hugin-VNC left 1  | 0 | 0 |
| hugin-VNC left 2  | 0 | 0 |
| hugin-PH right 1  | 0 | 0 |
| hugin-PH right 2  | 0 | 0 |
| hugin-PH left 1   | 0 | 0 |
| hugin-PH left 2   | 0 | 0 |

32.

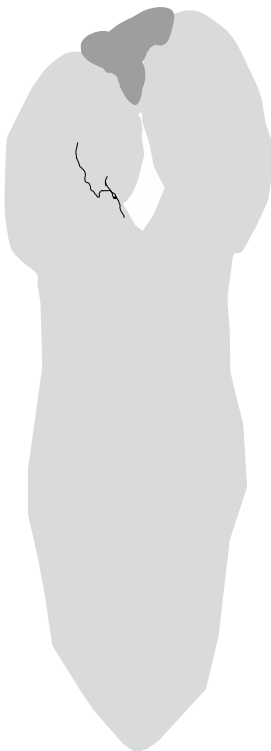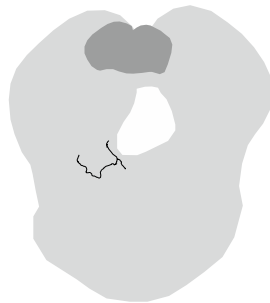

synapses to

synapses from

|                   |   |   |
|-------------------|---|---|
| hugin-PC right 1  | 0 | 0 |
| hugin-PC right 2  | 0 | 0 |
| hugin-PC right 3  | 0 | 0 |
| hugin-PC right 4  | 0 | 0 |
| hugin-PC left 1   | 0 | 0 |
| hugin-PC left 2   | 0 | 0 |
| hugin-PC left 3   | 0 | 0 |
| hugin-PC left 4   | 0 | 0 |
| hugin-RG right 1  | 0 | 0 |
| hugin-RG right 2  | 0 | 0 |
| hugin-RG left 1   | 0 | 0 |
| hugin-RG left 2   | 0 | 0 |
| hugin-VNC right 1 | 0 | 0 |
| hugin-VNC right 2 | 2 | 0 |
| hugin-VNC left 1  | 0 | 0 |
| hugin-VNC left 2  | 0 | 0 |
| hugin-PH right 1  | 0 | 0 |
| hugin-PH right 2  | 0 | 0 |
| hugin-PH left 1   | 0 | 0 |
| hugin-PH left 2   | 0 | 0 |

33.

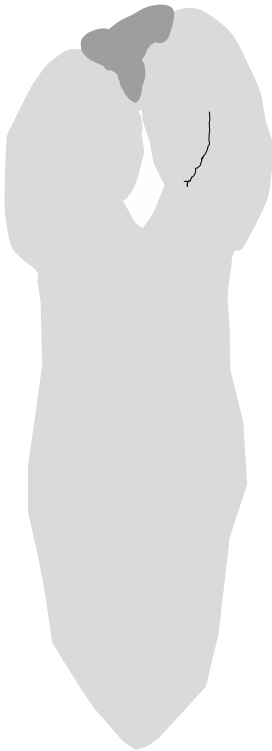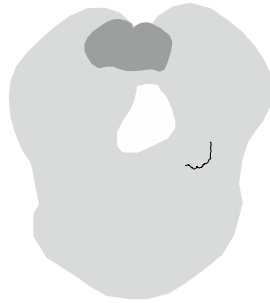

synapses to

synapses from

|                   |   |   |
|-------------------|---|---|
| hugin-PC right 1  | 0 | 0 |
| hugin-PC right 2  | 2 | 0 |
| hugin-PC right 3  | 0 | 0 |
| hugin-PC right 4  | 0 | 0 |
| hugin-PC left 1   | 0 | 0 |
| hugin-PC left 2   | 0 | 0 |
| hugin-PC left 3   | 0 | 0 |
| hugin-PC left 4   | 0 | 0 |
| hugin-RG right 1  | 0 | 0 |
| hugin-RG right 2  | 0 | 0 |
| hugin-RG left 1   | 0 | 0 |
| hugin-RG left 2   | 0 | 0 |
| hugin-VNC right 1 | 0 | 0 |
| hugin-VNC right 2 | 0 | 0 |
| hugin-VNC left 1  | 0 | 0 |
| hugin-VNC left 2  | 0 | 0 |
| hugin-PH right 1  | 0 | 0 |
| hugin-PH right 2  | 0 | 0 |
| hugin-PH left 1   | 0 | 0 |
| hugin-PH left 2   | 0 | 0 |

34.

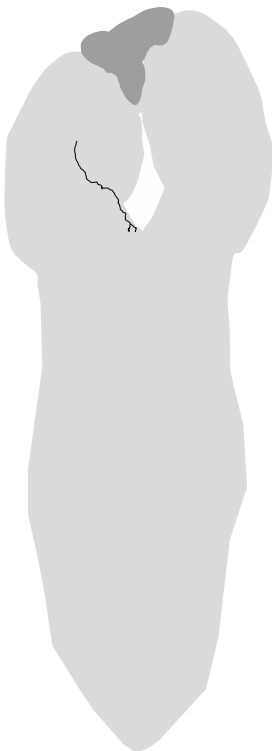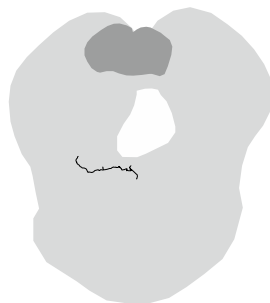

synapses to

synapses from

|                   |   |   |
|-------------------|---|---|
| hugin-PC right 1  | 0 | 0 |
| hugin-PC right 2  | 0 | 0 |
| hugin-PC right 3  | 0 | 0 |
| hugin-PC right 4  | 0 | 0 |
| hugin-PC left 1   | 0 | 0 |
| hugin-PC left 2   | 0 | 0 |
| hugin-PC left 3   | 0 | 0 |
| hugin-PC left 4   | 0 | 1 |
| hugin-RG right 1  | 0 | 0 |
| hugin-RG right 2  | 0 | 0 |
| hugin-RG left 1   | 0 | 0 |
| hugin-RG left 2   | 0 | 0 |
| hugin-VNC right 1 | 2 | 0 |
| hugin-VNC right 2 | 0 | 0 |
| hugin-VNC left 1  | 1 | 0 |
| hugin-VNC left 2  | 0 | 0 |
| hugin-PH right 1  | 0 | 0 |
| hugin-PH right 2  | 0 | 0 |
| hugin-PH left 1   | 0 | 0 |
| hugin-PH left 2   | 0 | 0 |

35.

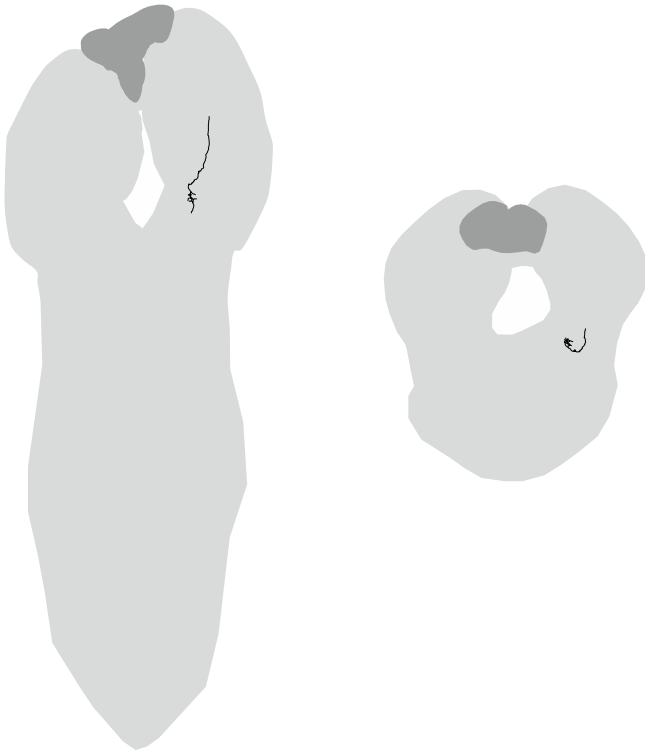

synapses to

synapses from

|                   |   |   |
|-------------------|---|---|
| hugin-PC right 1  | 0 | 0 |
| hugin-PC right 2  | 0 | 0 |
| hugin-PC right 3  | 2 | 0 |
| hugin-PC right 4  | 0 | 0 |
| hugin-PC left 1   | 0 | 0 |
| hugin-PC left 2   | 0 | 0 |
| hugin-PC left 3   | 0 | 0 |
| hugin-PC left 4   | 0 | 0 |
| hugin-RG right 1  | 0 | 0 |
| hugin-RG right 2  | 0 | 0 |
| hugin-RG left 1   | 0 | 0 |
| hugin-RG left 2   | 0 | 0 |
| hugin-VNC right 1 | 0 | 0 |
| hugin-VNC right 2 | 0 | 0 |
| hugin-VNC left 1  | 0 | 0 |
| hugin-VNC left 2  | 0 | 0 |
| hugin-PH right 1  | 0 | 0 |
| hugin-PH right 2  | 0 | 0 |
| hugin-PH left 1   | 0 | 0 |
| hugin-PH left 2   | 0 | 0 |

36.

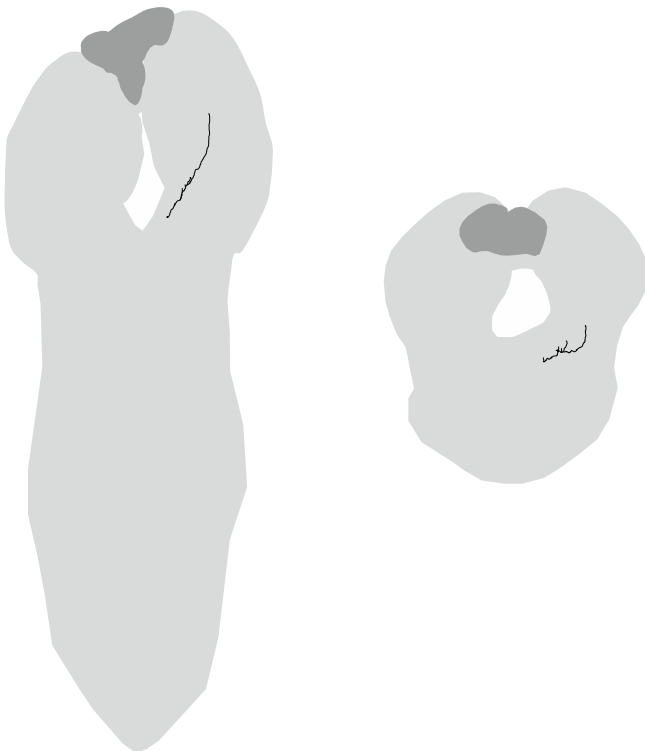

synapses to

synapses from

|                   |   |   |
|-------------------|---|---|
| hugin-PC right 1  | 0 | 0 |
| hugin-PC right 2  | 3 | 0 |
| hugin-PC right 3  | 0 | 0 |
| hugin-PC right 4  | 0 | 0 |
| hugin-PC left 1   | 0 | 0 |
| hugin-PC left 2   | 0 | 0 |
| hugin-PC left 3   | 0 | 0 |
| hugin-PC left 4   | 0 | 0 |
| hugin-RG right 1  | 0 | 0 |
| hugin-RG right 2  | 0 | 0 |
| hugin-RG left 1   | 0 | 0 |
| hugin-RG left 2   | 0 | 0 |
| hugin-VNC right 1 | 0 | 0 |
| hugin-VNC right 2 | 0 | 0 |
| hugin-VNC left 1  | 0 | 0 |
| hugin-VNC left 2  | 0 | 0 |
| hugin-PH right 1  | 0 | 0 |
| hugin-PH right 2  | 0 | 0 |
| hugin-PH left 1   | 0 | 0 |
| hugin-PH left 2   | 0 | 0 |

37.

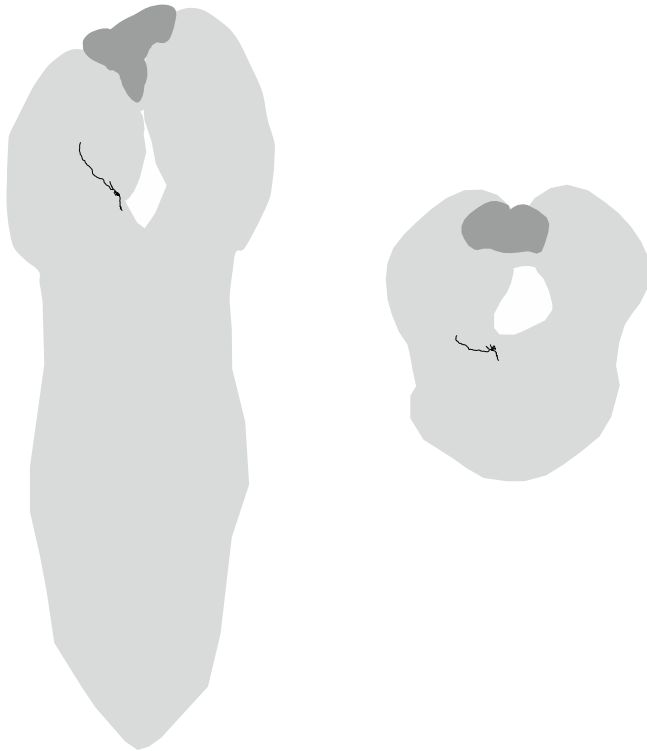

synapses to

synapses from

|                   |   |   |
|-------------------|---|---|
| hugin-PC right 1  | 0 | 0 |
| hugin-PC right 2  | 0 | 0 |
| hugin-PC right 3  | 0 | 0 |
| hugin-PC right 4  | 0 | 0 |
| hugin-PC left 1   | 0 | 0 |
| hugin-PC left 2   | 1 | 0 |
| hugin-PC left 3   | 2 | 0 |
| hugin-PC left 4   | 1 | 0 |
| hugin-RG right 1  | 0 | 0 |
| hugin-RG right 2  | 0 | 0 |
| hugin-RG left 1   | 0 | 0 |
| hugin-RG left 2   | 0 | 0 |
| hugin-VNC right 1 | 0 | 0 |
| hugin-VNC right 2 | 0 | 0 |
| hugin-VNC left 1  | 0 | 0 |
| hugin-VNC left 2  | 0 | 0 |
| hugin-PH right 1  | 0 | 0 |
| hugin-PH right 2  | 0 | 0 |
| hugin-PH left 1   | 0 | 0 |
| hugin-PH left 2   | 0 | 0 |

38.

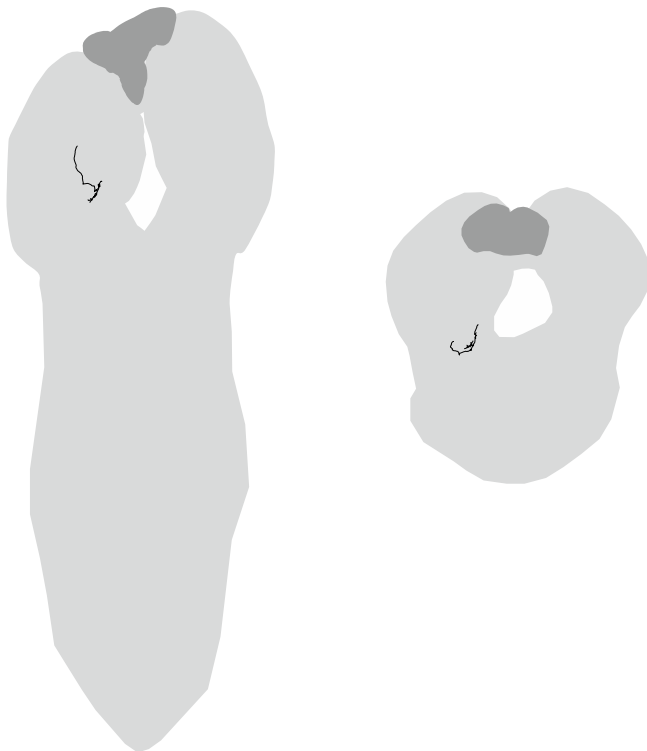

synapses to

synapses from

|                   |   |   |
|-------------------|---|---|
| hugin-PC right 1  | 0 | 0 |
| hugin-PC right 2  | 0 | 0 |
| hugin-PC right 3  | 0 | 0 |
| hugin-PC right 4  | 0 | 0 |
| hugin-PC left 1   | 2 | 0 |
| hugin-PC left 2   | 0 | 0 |
| hugin-PC left 3   | 0 | 0 |
| hugin-PC left 4   | 0 | 0 |
| hugin-RG right 1  | 0 | 0 |
| hugin-RG right 2  | 0 | 0 |
| hugin-RG left 1   | 0 | 0 |
| hugin-RG left 2   | 0 | 0 |
| hugin-VNC right 1 | 0 | 0 |
| hugin-VNC right 2 | 0 | 0 |
| hugin-VNC left 1  | 0 | 0 |
| hugin-VNC left 2  | 0 | 0 |
| hugin-PH right 1  | 0 | 0 |
| hugin-PH right 2  | 0 | 0 |
| hugin-PH left 1   | 0 | 0 |
| hugin-PH left 2   | 0 | 0 |



39.

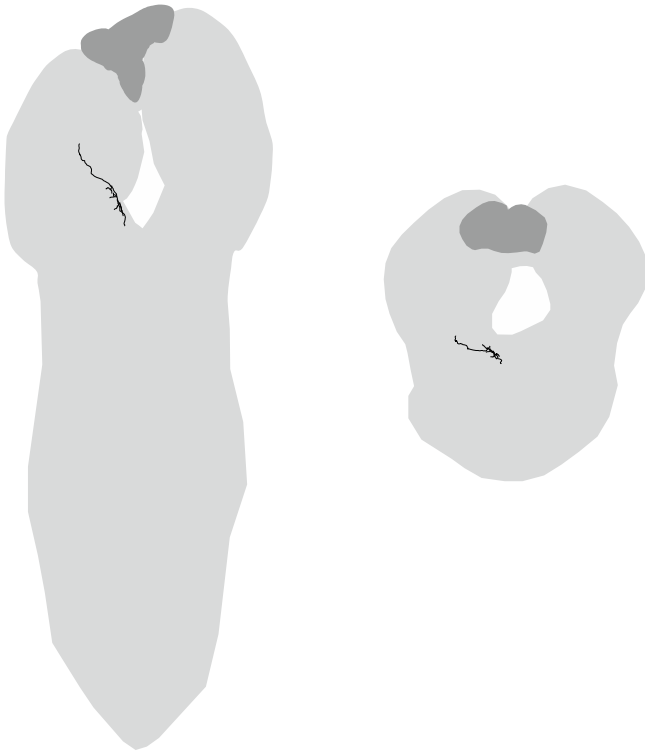

synapses to

synapses from

|                   |   |   |
|-------------------|---|---|
| hugin-PC right 1  | 0 | 0 |
| hugin-PC right 2  | 0 | 0 |
| hugin-PC right 3  | 0 | 0 |
| hugin-PC right 4  | 0 | 0 |
| hugin-PC left 1   | 3 | 0 |
| hugin-PC left 2   | 1 | 0 |
| hugin-PC left 3   | 2 | 0 |
| hugin-PC left 4   | 0 | 0 |
| hugin-RG right 1  | 0 | 0 |
| hugin-RG right 2  | 0 | 0 |
| hugin-RG left 1   | 0 | 0 |
| hugin-RG left 2   | 0 | 0 |
| hugin-VNC right 1 | 0 | 0 |
| hugin-VNC right 2 | 1 | 0 |
| hugin-VNC left 1  | 0 | 0 |
| hugin-VNC left 2  | 0 | 0 |
| hugin-PH right 1  | 0 | 0 |
| hugin-PH right 2  | 0 | 0 |
| hugin-PH left 1   | 0 | 0 |
| hugin-PH left 2   | 0 | 0 |

40.

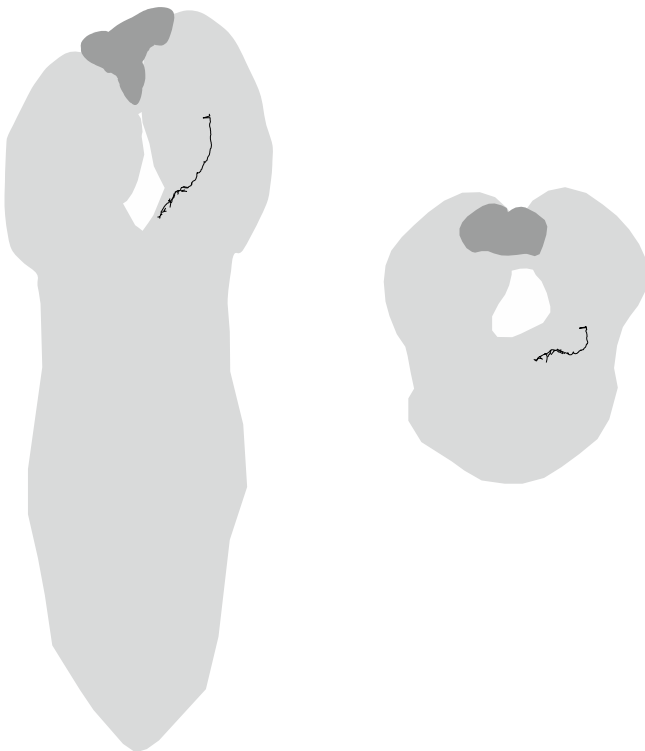

synapses to

synapses from

|                   |   |   |
|-------------------|---|---|
| hugin-PC right 1  | 2 | 2 |
| hugin-PC right 2  | 0 | 0 |
| hugin-PC right 3  | 0 | 0 |
| hugin-PC right 4  | 0 | 0 |
| hugin-PC left 1   | 0 | 0 |
| hugin-PC left 2   | 0 | 0 |
| hugin-PC left 3   | 0 | 0 |
| hugin-PC left 4   | 0 | 0 |
| hugin-RG right 1  | 0 | 0 |
| hugin-RG right 2  | 0 | 0 |
| hugin-RG left 1   | 0 | 0 |
| hugin-RG left 2   | 0 | 0 |
| hugin-VNC right 1 | 0 | 0 |
| hugin-VNC right 2 | 0 | 0 |
| hugin-VNC left 1  | 0 | 0 |
| hugin-VNC left 2  | 0 | 0 |
| hugin-PH right 1  | 0 | 0 |
| hugin-PH right 2  | 0 | 0 |
| hugin-PH left 1   | 0 | 0 |
| hugin-PH left 2   | 0 | 0 |

41.

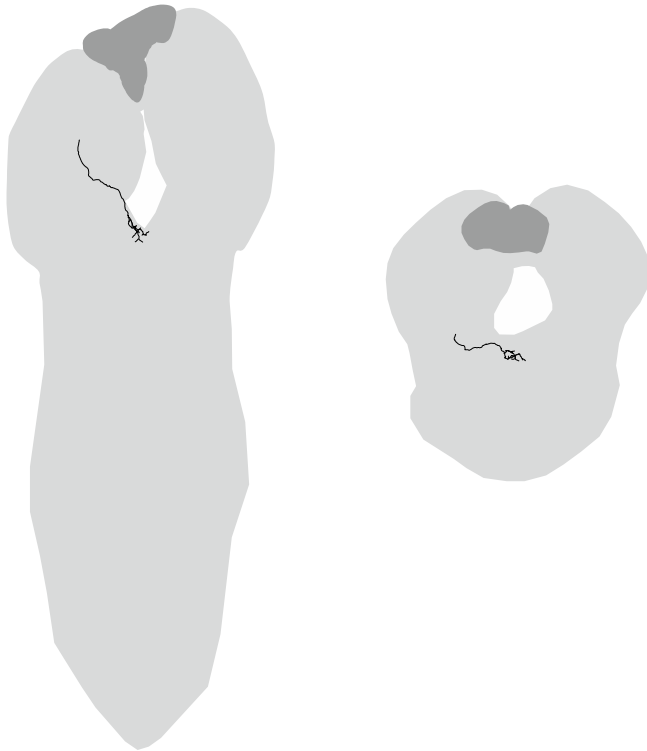

synapses to

synapses from

|                   |   |   |
|-------------------|---|---|
| hugin-PC right 1  | 0 | 0 |
| hugin-PC right 2  | 0 | 0 |
| hugin-PC right 3  | 0 | 0 |
| hugin-PC right 4  | 0 | 0 |
| hugin-PC left 1   | 0 | 0 |
| hugin-PC left 2   | 0 | 0 |
| hugin-PC left 3   | 1 | 0 |
| hugin-PC left 4   | 0 | 0 |
| hugin-RG right 1  | 0 | 0 |
| hugin-RG right 2  | 0 | 0 |
| hugin-RG left 1   | 0 | 0 |
| hugin-RG left 2   | 0 | 0 |
| hugin-VNC right 1 | 2 | 0 |
| hugin-VNC right 2 | 0 | 0 |
| hugin-VNC left 1  | 2 | 0 |
| hugin-VNC left 2  | 0 | 0 |
| hugin-PH right 1  | 0 | 0 |
| hugin-PH right 2  | 0 | 0 |
| hugin-PH left 1   | 0 | 0 |
| hugin-PH left 2   | 0 | 0 |

42.

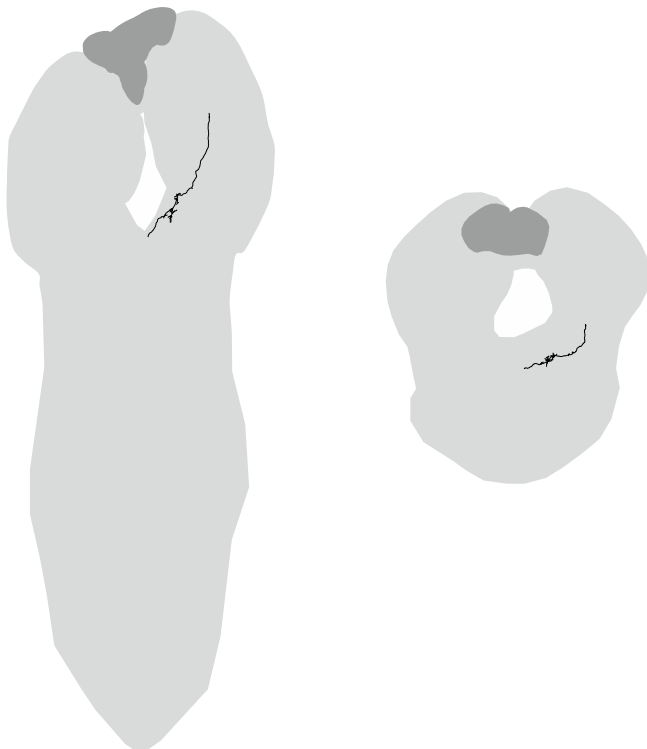

synapses to

synapses from

|                   |   |   |
|-------------------|---|---|
| hugin-PC right 1  | 0 | 0 |
| hugin-PC right 2  | 1 | 0 |
| hugin-PC right 3  | 1 | 0 |
| hugin-PC right 4  | 1 | 0 |
| hugin-PC left 1   | 0 | 0 |
| hugin-PC left 2   | 0 | 0 |
| hugin-PC left 3   | 0 | 0 |
| hugin-PC left 4   | 0 | 0 |
| hugin-RG right 1  | 0 | 0 |
| hugin-RG right 2  | 0 | 0 |
| hugin-RG left 1   | 0 | 0 |
| hugin-RG left 2   | 0 | 0 |
| hugin-VNC right 1 | 0 | 0 |
| hugin-VNC right 2 | 0 | 0 |
| hugin-VNC left 1  | 0 | 0 |
| hugin-VNC left 2  | 0 | 0 |
| hugin-PH right 1  | 0 | 0 |
| hugin-PH right 2  | 0 | 0 |
| hugin-PH left 1   | 0 | 0 |
| hugin-PH left 2   | 0 | 0 |

43.

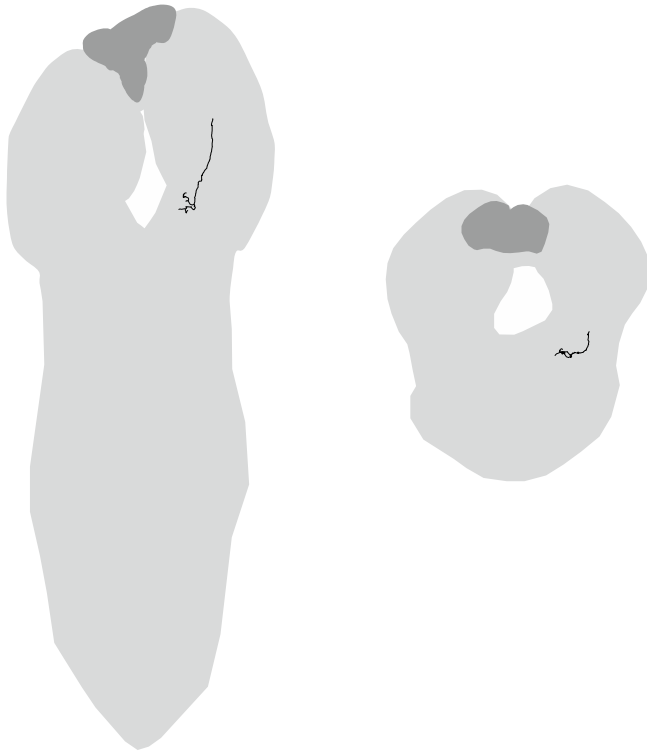

synapses to

synapses from

|                   |   |   |
|-------------------|---|---|
| hugin-PC right 1  | 0 | 0 |
| hugin-PC right 2  | 0 | 0 |
| hugin-PC right 3  | 0 | 0 |
| hugin-PC right 4  | 3 | 0 |
| hugin-PC left 1   | 0 | 0 |
| hugin-PC left 2   | 0 | 0 |
| hugin-PC left 3   | 0 | 0 |
| hugin-PC left 4   | 0 | 0 |
| hugin-RG right 1  | 0 | 0 |
| hugin-RG right 2  | 0 | 0 |
| hugin-RG left 1   | 0 | 0 |
| hugin-RG left 2   | 0 | 0 |
| hugin-VNC right 1 | 0 | 0 |
| hugin-VNC right 2 | 0 | 0 |
| hugin-VNC left 1  | 0 | 0 |
| hugin-VNC left 2  | 0 | 0 |
| hugin-PH right 1  | 0 | 0 |
| hugin-PH right 2  | 0 | 0 |
| hugin-PH left 1   | 0 | 0 |
| hugin-PH left 2   | 0 | 0 |

44.

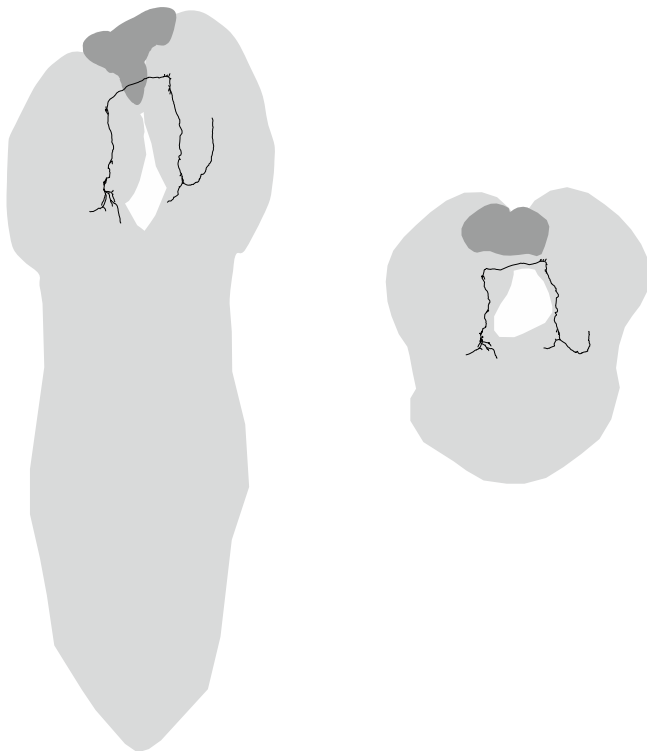

synapses to

synapses from

|                   |   |   |
|-------------------|---|---|
| hugin-PC right 1  | 1 | 1 |
| hugin-PC right 2  | 1 | 0 |
| hugin-PC right 3  | 1 | 0 |
| hugin-PC right 4  | 1 | 0 |
| hugin-PC left 1   | 0 | 0 |
| hugin-PC left 2   | 1 | 0 |
| hugin-PC left 3   | 1 | 0 |
| hugin-PC left 4   | 0 | 0 |
| hugin-RG right 1  | 0 | 0 |
| hugin-RG right 2  | 0 | 0 |
| hugin-RG left 1   | 0 | 0 |
| hugin-RG left 2   | 0 | 0 |
| hugin-VNC right 1 | 0 | 0 |
| hugin-VNC right 2 | 0 | 0 |
| hugin-VNC left 1  | 0 | 0 |
| hugin-VNC left 2  | 0 | 0 |
| hugin-PH right 1  | 0 | 0 |
| hugin-PH right 2  | 0 | 0 |
| hugin-PH left 1   | 0 | 0 |
| hugin-PH left 2   | 0 | 0 |

45.

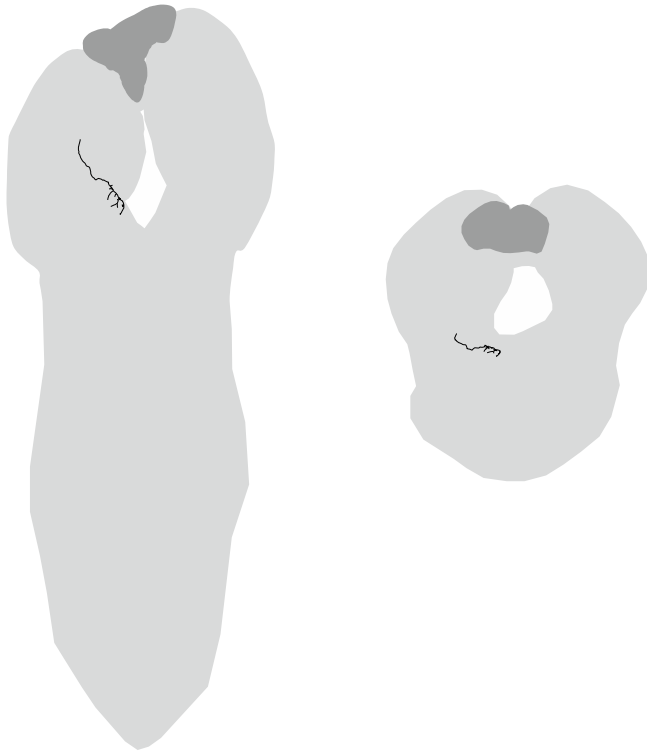

synapses to

synapses from

|                   |   |   |
|-------------------|---|---|
| hugin-PC right 1  | 0 | 0 |
| hugin-PC right 2  | 0 | 0 |
| hugin-PC right 3  | 0 | 0 |
| hugin-PC right 4  | 0 | 0 |
| hugin-PC left 1   | 0 | 0 |
| hugin-PC left 2   | 0 | 0 |
| hugin-PC left 3   | 0 | 0 |
| hugin-PC left 4   | 2 | 0 |
| hugin-RG right 1  | 0 | 0 |
| hugin-RG right 2  | 0 | 0 |
| hugin-RG left 1   | 0 | 0 |
| hugin-RG left 2   | 0 | 0 |
| hugin-VNC right 1 | 0 | 0 |
| hugin-VNC right 2 | 0 | 0 |
| hugin-VNC left 1  | 0 | 0 |
| hugin-VNC left 2  | 0 | 0 |
| hugin-PH right 1  | 0 | 0 |
| hugin-PH right 2  | 0 | 0 |
| hugin-PH left 1   | 0 | 0 |
| hugin-PH left 2   | 0 | 0 |

46.

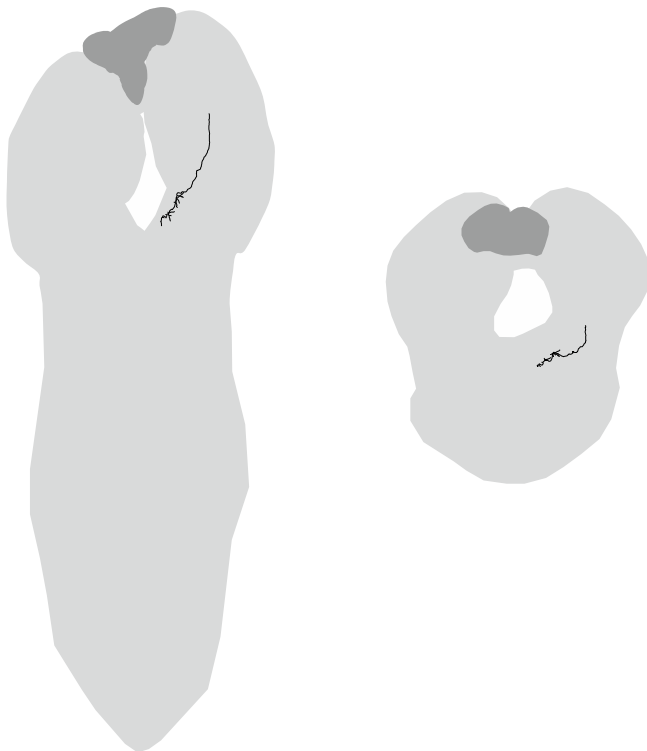

synapses to

synapses from

|                   |   |   |
|-------------------|---|---|
| hugin-PC right 1  | 3 | 0 |
| hugin-PC right 2  | 0 | 0 |
| hugin-PC right 3  | 0 | 0 |
| hugin-PC right 4  | 0 | 0 |
| hugin-PC left 1   | 0 | 0 |
| hugin-PC left 2   | 0 | 0 |
| hugin-PC left 3   | 0 | 0 |
| hugin-PC left 4   | 0 | 0 |
| hugin-RG right 1  | 0 | 0 |
| hugin-RG right 2  | 0 | 0 |
| hugin-RG left 1   | 0 | 0 |
| hugin-RG left 2   | 0 | 0 |
| hugin-VNC right 1 | 0 | 0 |
| hugin-VNC right 2 | 0 | 0 |
| hugin-VNC left 1  | 0 | 0 |
| hugin-VNC left 2  | 0 | 0 |
| hugin-PH right 1  | 0 | 0 |
| hugin-PH right 2  | 0 | 0 |
| hugin-PH left 1   | 0 | 0 |
| hugin-PH left 2   | 0 | 0 |

# I AbdN sensory neurons

1.

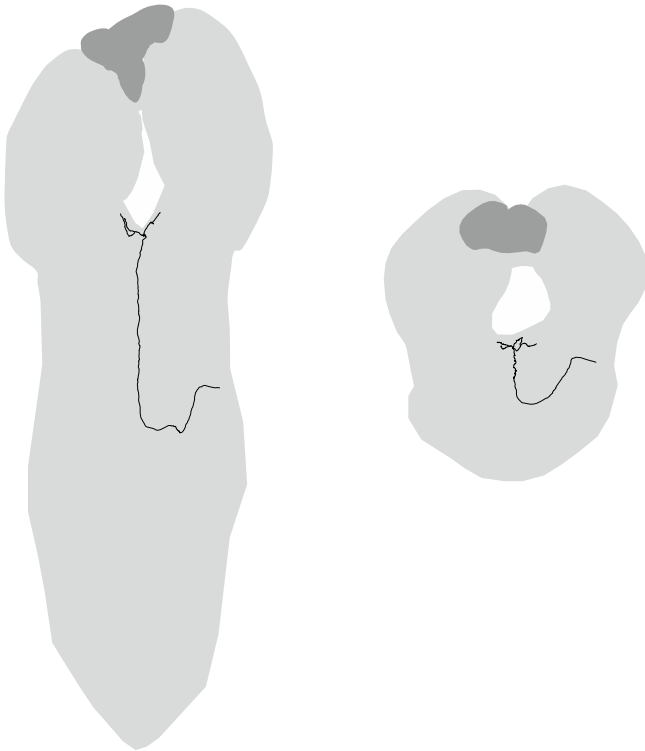

synapses to

synapses from

|                   |   |   |
|-------------------|---|---|
| hugin-PC right 1  | 0 | 0 |
| hugin-PC right 2  | 0 | 0 |
| hugin-PC right 3  | 0 | 0 |
| hugin-PC right 4  | 0 | 0 |
| hugin-PC left 1   | 0 | 0 |
| hugin-PC left 2   | 0 | 0 |
| hugin-PC left 3   | 0 | 0 |
| hugin-PC left 4   | 0 | 0 |
| hugin-RG right 1  | 0 | 0 |
| hugin-RG right 2  | 0 | 0 |
| hugin-RG left 1   | 0 | 0 |
| hugin-RG left 2   | 0 | 0 |
| hugin-VNC right 1 | 2 | 0 |
| hugin-VNC right 2 | 0 | 0 |
| hugin-VNC left 1  | 1 | 0 |
| hugin-VNC left 2  | 1 | 0 |
| hugin-PH right 1  | 0 | 0 |
| hugin-PH right 2  | 0 | 0 |
| hugin-PH left 1   | 0 | 0 |
| hugin-PH left 2   | 0 | 0 |

2.

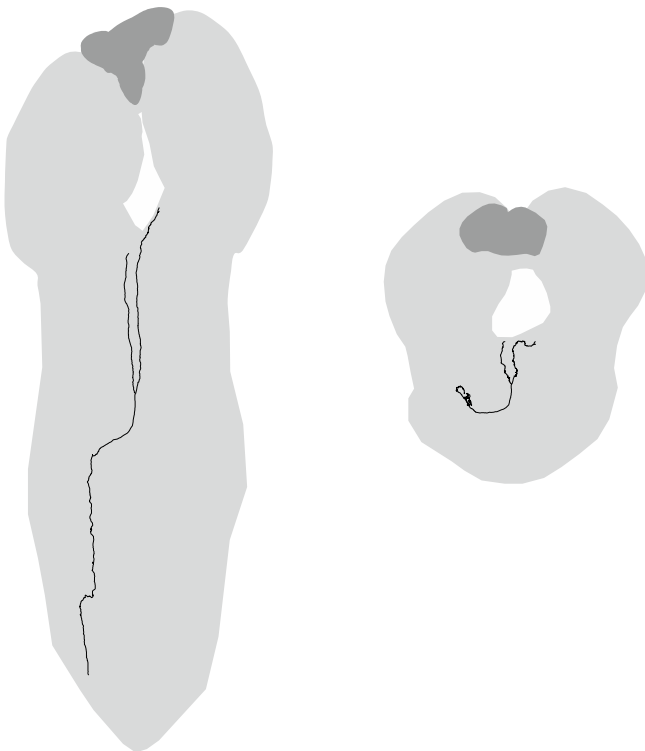

synapses to

synapses from

|                   |   |   |
|-------------------|---|---|
| hugin-PC right 1  | 0 | 0 |
| hugin-PC right 2  | 0 | 0 |
| hugin-PC right 3  | 0 | 0 |
| hugin-PC right 4  | 0 | 0 |
| hugin-PC left 1   | 0 | 0 |
| hugin-PC left 2   | 0 | 0 |
| hugin-PC left 3   | 0 | 0 |
| hugin-PC left 4   | 0 | 0 |
| hugin-RG right 1  | 0 | 0 |
| hugin-RG right 2  | 0 | 0 |
| hugin-RG left 1   | 0 | 0 |
| hugin-RG left 2   | 0 | 0 |
| hugin-VNC right 1 | 1 | 0 |
| hugin-VNC right 2 | 0 | 0 |
| hugin-VNC left 1  | 1 | 0 |
| hugin-VNC left 2  | 2 | 0 |
| hugin-PH right 1  | 0 | 0 |
| hugin-PH right 2  | 0 | 0 |
| hugin-PH left 1   | 0 | 0 |
| hugin-PH left 2   | 0 | 0 |

3.

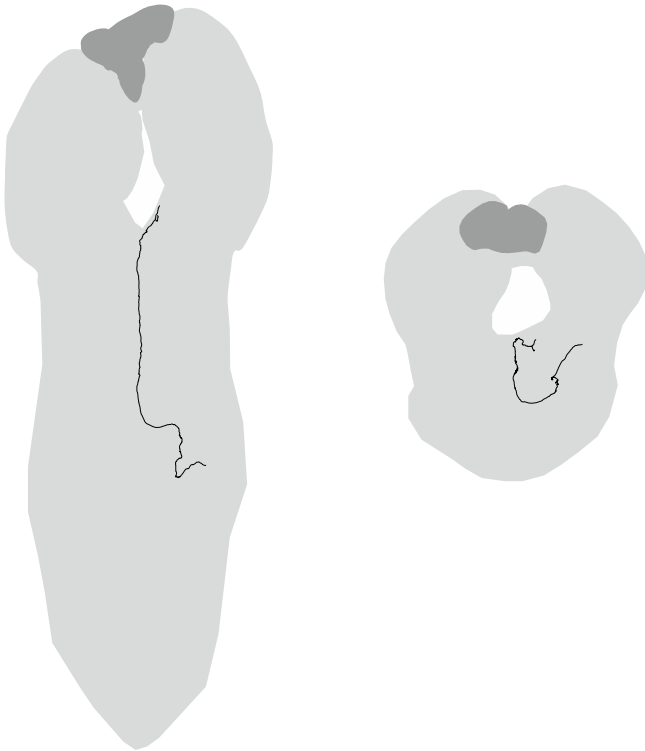

synapses to      synapses from

|                   |   |   |
|-------------------|---|---|
| hugin-PC right 1  | 0 | 0 |
| hugin-PC right 2  | 0 | 0 |
| hugin-PC right 3  | 0 | 0 |
| hugin-PC right 4  | 0 | 0 |
| hugin-PC left 1   | 0 | 0 |
| hugin-PC left 2   | 0 | 0 |
| hugin-PC left 3   | 0 | 0 |
| hugin-PC left 4   | 0 | 0 |
| hugin-RG right 1  | 0 | 0 |
| hugin-RG right 2  | 0 | 0 |
| hugin-RG left 1   | 0 | 0 |
| hugin-RG left 2   | 0 | 0 |
| hugin-VNC right 1 | 2 | 0 |
| hugin-VNC right 2 | 0 | 0 |
| hugin-VNC left 1  | 2 | 0 |
| hugin-VNC left 2  | 3 | 0 |
| hugin-PH right 1  | 0 | 0 |
| hugin-PH right 2  | 0 | 0 |
| hugin-PH left 1   | 0 | 0 |
| hugin-PH left 2   | 0 | 0 |

4.

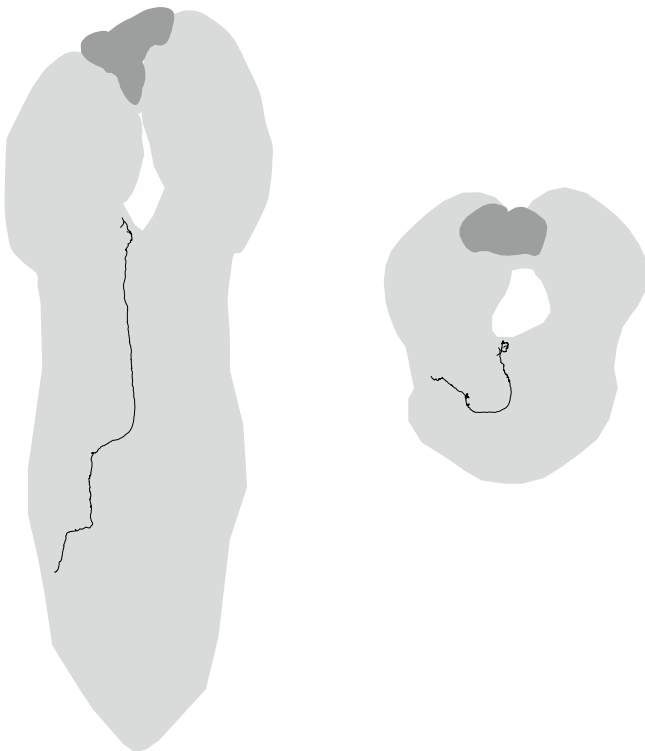

synapses to      synapses from

|                   |   |   |
|-------------------|---|---|
| hugin-PC right 1  | 0 | 0 |
| hugin-PC right 2  | 0 | 0 |
| hugin-PC right 3  | 0 | 0 |
| hugin-PC right 4  | 0 | 0 |
| hugin-PC left 1   | 0 | 0 |
| hugin-PC left 2   | 0 | 0 |
| hugin-PC left 3   | 0 | 0 |
| hugin-PC left 4   | 1 | 0 |
| hugin-RG right 1  | 0 | 0 |
| hugin-RG right 2  | 0 | 0 |
| hugin-RG left 1   | 0 | 0 |
| hugin-RG left 2   | 0 | 0 |
| hugin-VNC right 1 | 1 | 0 |
| hugin-VNC right 2 | 1 | 0 |
| hugin-VNC left 1  | 0 | 0 |
| hugin-VNC left 2  | 0 | 0 |
| hugin-PH right 1  | 0 | 0 |
| hugin-PH right 2  | 0 | 0 |
| hugin-PH left 1   | 0 | 0 |
| hugin-PH left 2   | 0 | 0 |

5.

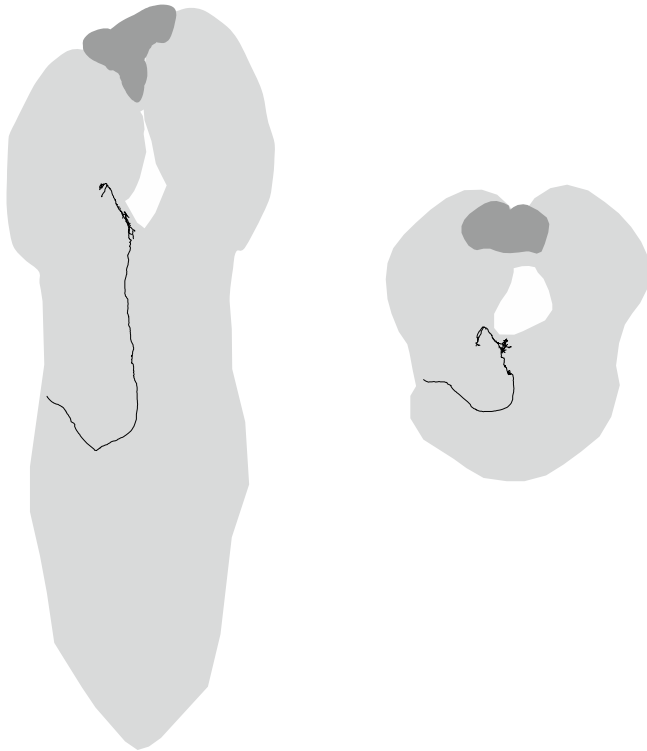

synapses to      synapses from

|                   |   |   |
|-------------------|---|---|
| hugin-PC right 1  | 0 | 0 |
| hugin-PC right 2  | 0 | 0 |
| hugin-PC right 3  | 0 | 0 |
| hugin-PC right 4  | 0 | 0 |
| hugin-PC left 1   | 0 | 0 |
| hugin-PC left 2   | 0 | 0 |
| hugin-PC left 3   | 1 | 0 |
| hugin-PC left 4   | 0 | 0 |
| hugin-RG right 1  | 0 | 0 |
| hugin-RG right 2  | 0 | 0 |
| hugin-RG left 1   | 0 | 0 |
| hugin-RG left 2   | 0 | 0 |
| hugin-VNC right 1 | 1 | 0 |
| hugin-VNC right 2 | 3 | 0 |
| hugin-VNC left 1  | 2 | 0 |
| hugin-VNC left 2  | 0 | 0 |
| hugin-PH right 1  | 0 | 0 |
| hugin-PH right 2  | 0 | 0 |
| hugin-PH left 1   | 0 | 0 |
| hugin-PH left 2   | 0 | 0 |

6.

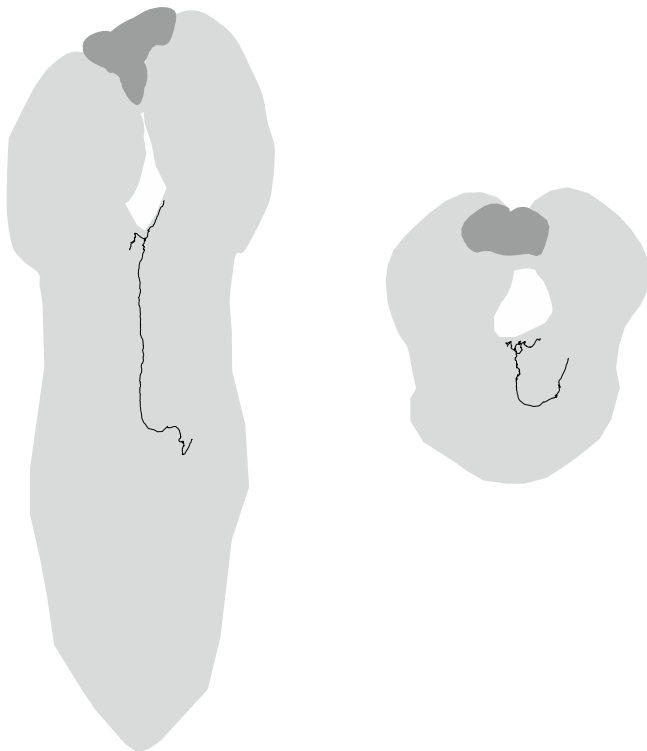

synapses to      synapses from

|                   |   |   |
|-------------------|---|---|
| hugin-PC right 1  | 0 | 0 |
| hugin-PC right 2  | 0 | 0 |
| hugin-PC right 3  | 0 | 0 |
| hugin-PC right 4  | 0 | 0 |
| hugin-PC left 1   | 0 | 0 |
| hugin-PC left 2   | 0 | 0 |
| hugin-PC left 3   | 0 | 0 |
| hugin-PC left 4   | 0 | 0 |
| hugin-RG right 1  | 0 | 0 |
| hugin-RG right 2  | 1 | 0 |
| hugin-RG left 1   | 0 | 0 |
| hugin-RG left 2   | 0 | 0 |
| hugin-VNC right 1 | 6 | 0 |
| hugin-VNC right 2 | 0 | 0 |
| hugin-VNC left 1  | 0 | 0 |
| hugin-VNC left 2  | 0 | 0 |
| hugin-PH right 1  | 0 | 0 |
| hugin-PH right 2  | 0 | 0 |
| hugin-PH left 1   | 0 | 0 |
| hugin-PH left 2   | 0 | 0 |

7.

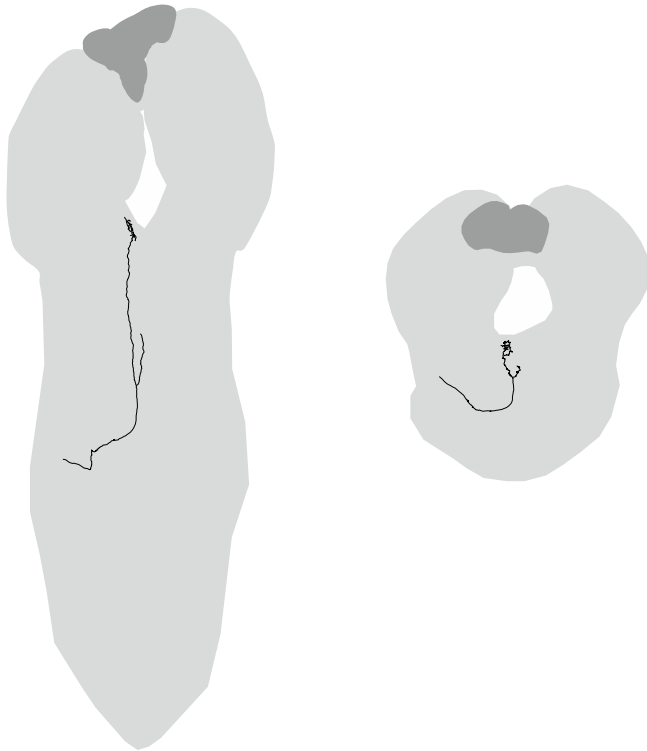

synapses to

synapses from

|                   |   |   |
|-------------------|---|---|
| hugin-PC right 1  | 0 | 0 |
| hugin-PC right 2  | 0 | 0 |
| hugin-PC right 3  | 0 | 0 |
| hugin-PC right 4  | 0 | 0 |
| hugin-PC left 1   | 0 | 0 |
| hugin-PC left 2   | 0 | 0 |
| hugin-PC left 3   | 0 | 0 |
| hugin-PC left 4   | 0 | 0 |
| hugin-RG right 1  | 0 | 0 |
| hugin-RG right 2  | 0 | 0 |
| hugin-RG left 1   | 0 | 0 |
| hugin-RG left 2   | 0 | 0 |
| hugin-VNC right 1 | 2 | 0 |
| hugin-VNC right 2 | 4 | 0 |
| hugin-VNC left 1  | 3 | 0 |
| hugin-VNC left 2  | 0 | 0 |
| hugin-PH right 1  | 0 | 0 |
| hugin-PH right 2  | 0 | 0 |
| hugin-PH left 1   | 0 | 0 |
| hugin-PH left 2   | 0 | 0 |

8.

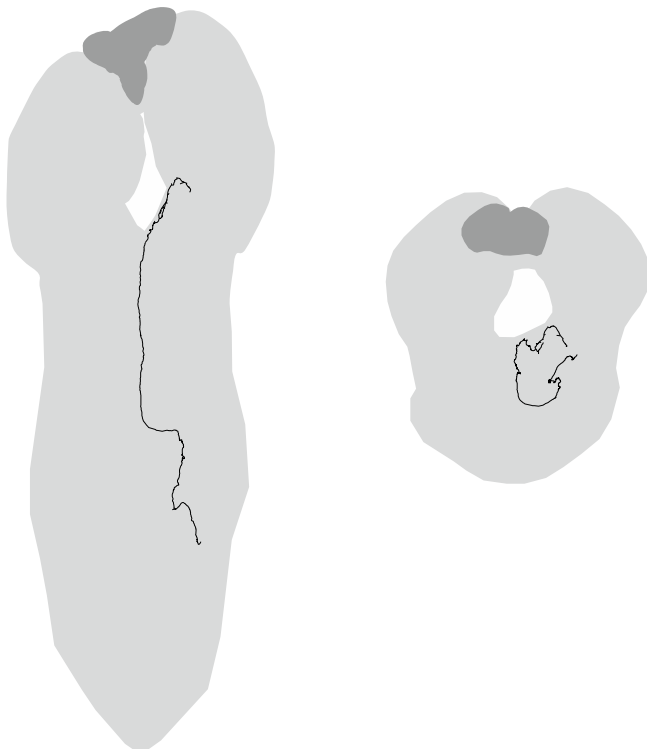

synapses to

synapses from

|                   |   |   |
|-------------------|---|---|
| hugin-PC right 1  | 0 | 0 |
| hugin-PC right 2  | 1 | 0 |
| hugin-PC right 3  | 0 | 0 |
| hugin-PC right 4  | 0 | 0 |
| hugin-PC left 1   | 0 | 0 |
| hugin-PC left 2   | 0 | 0 |
| hugin-PC left 3   | 0 | 0 |
| hugin-PC left 4   | 0 | 0 |
| hugin-RG right 1  | 0 | 0 |
| hugin-RG right 2  | 0 | 0 |
| hugin-RG left 1   | 0 | 0 |
| hugin-RG left 2   | 0 | 0 |
| hugin-VNC right 1 | 1 | 0 |
| hugin-VNC right 2 | 0 | 0 |
| hugin-VNC left 1  | 2 | 0 |
| hugin-VNC left 2  | 0 | 0 |
| hugin-PH right 1  | 0 | 0 |
| hugin-PH right 2  | 0 | 0 |
| hugin-PH left 1   | 0 | 0 |
| hugin-PH left 2   | 0 | 0 |



9.

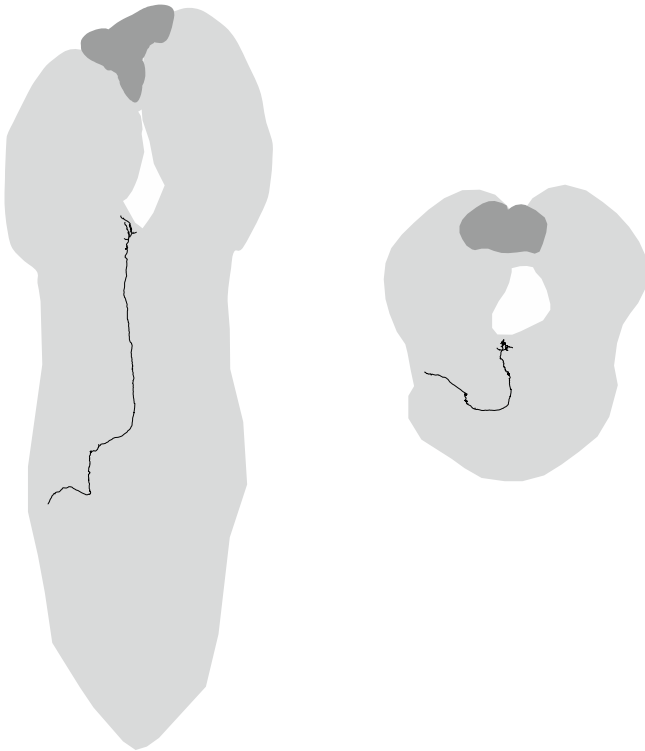

synapses to

synapses from

|                   |   |   |
|-------------------|---|---|
| hugin-PC right 1  | 0 | 0 |
| hugin-PC right 2  | 0 | 0 |
| hugin-PC right 3  | 0 | 0 |
| hugin-PC right 4  | 0 | 0 |
| hugin-PC left 1   | 0 | 0 |
| hugin-PC left 2   | 0 | 0 |
| hugin-PC left 3   | 0 | 0 |
| hugin-PC left 4   | 0 | 0 |
| hugin-RG right 1  | 0 | 0 |
| hugin-RG right 2  | 0 | 0 |
| hugin-RG left 1   | 0 | 0 |
| hugin-RG left 2   | 0 | 0 |
| hugin-VNC right 1 | 3 | 0 |
| hugin-VNC right 2 | 2 | 0 |
| hugin-VNC left 1  | 4 | 0 |
| hugin-VNC left 2  | 0 | 0 |
| hugin-PH right 1  | 0 | 0 |
| hugin-PH right 2  | 0 | 0 |
| hugin-PH left 1   | 0 | 0 |
| hugin-PH left 2   | 0 | 0 |

10.

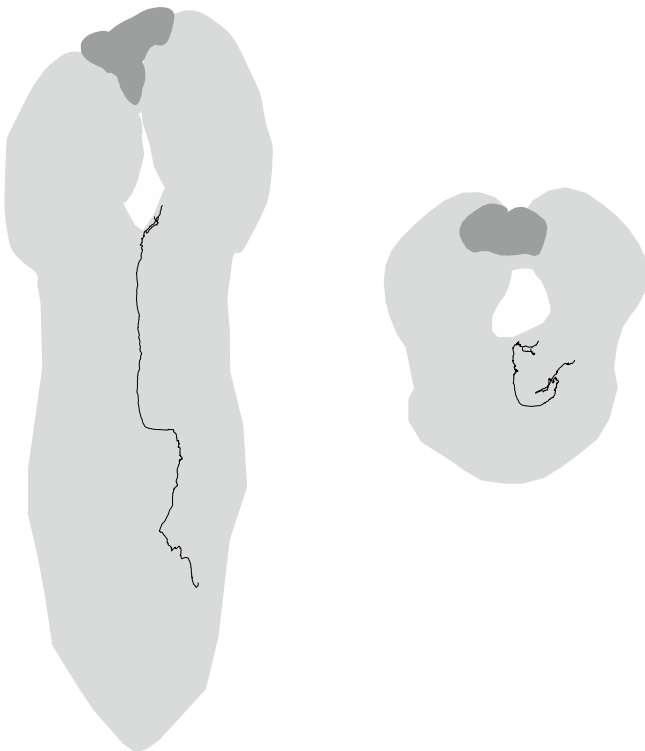

synapses to

synapses from

|                   |   |   |
|-------------------|---|---|
| hugin-PC right 1  | 0 | 0 |
| hugin-PC right 2  | 0 | 0 |
| hugin-PC right 3  | 0 | 0 |
| hugin-PC right 4  | 0 | 0 |
| hugin-PC left 1   | 0 | 0 |
| hugin-PC left 2   | 0 | 0 |
| hugin-PC left 3   | 0 | 0 |
| hugin-PC left 4   | 0 | 0 |
| hugin-RG right 1  | 0 | 0 |
| hugin-RG right 2  | 0 | 0 |
| hugin-RG left 1   | 0 | 0 |
| hugin-RG left 2   | 0 | 0 |
| hugin-VNC right 1 | 3 | 0 |
| hugin-VNC right 2 | 0 | 0 |
| hugin-VNC left 1  | 3 | 0 |
| hugin-VNC left 2  | 4 | 0 |
| hugin-PH right 1  | 0 | 0 |
| hugin-PH right 2  | 0 | 0 |
| hugin-PH left 1   | 0 | 0 |
| hugin-PH left 2   | 0 | 0 |

11.

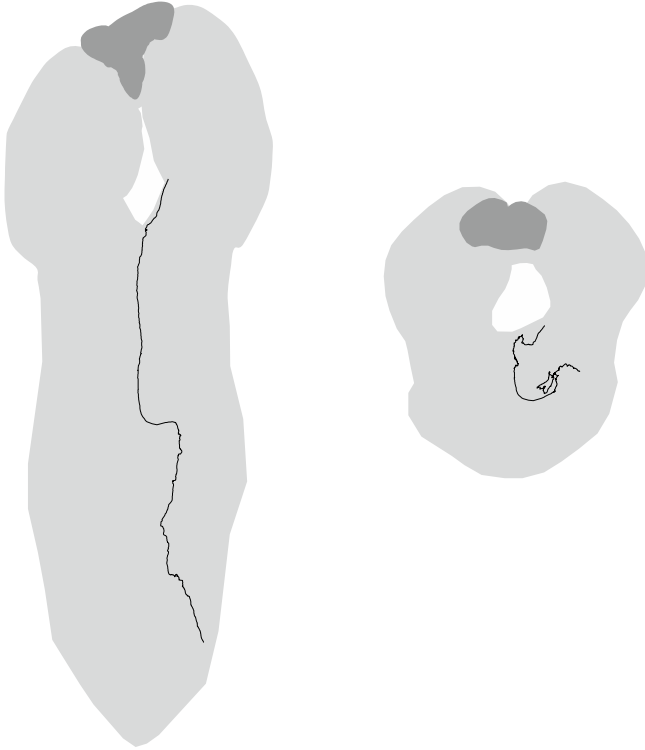

|                   | synapses to | synapses from |
|-------------------|-------------|---------------|
| hugin-PC right 1  | 0           | 0             |
| hugin-PC right 2  | 0           | 0             |
| hugin-PC right 3  | 0           | 0             |
| hugin-PC right 4  | 0           | 0             |
| hugin-PC left 1   | 0           | 0             |
| hugin-PC left 2   | 0           | 0             |
| hugin-PC left 3   | 0           | 0             |
| hugin-PC left 4   | 0           | 0             |
| hugin-RG right 1  | 0           | 0             |
| hugin-RG right 2  | 0           | 0             |
| hugin-RG left 1   | 0           | 0             |
| hugin-RG left 2   | 0           | 0             |
| hugin-VNC right 1 | 4           | 0             |
| hugin-VNC right 2 | 0           | 0             |
| hugin-VNC left 1  | 0           | 0             |
| hugin-VNC left 2  | 4           | 0             |
| hugin-PH right 1  | 0           | 0             |
| hugin-PH right 2  | 0           | 0             |
| hugin-PH left 1   | 0           | 0             |
| hugin-PH left 2   | 0           | 0             |

## J Interneurons

1.

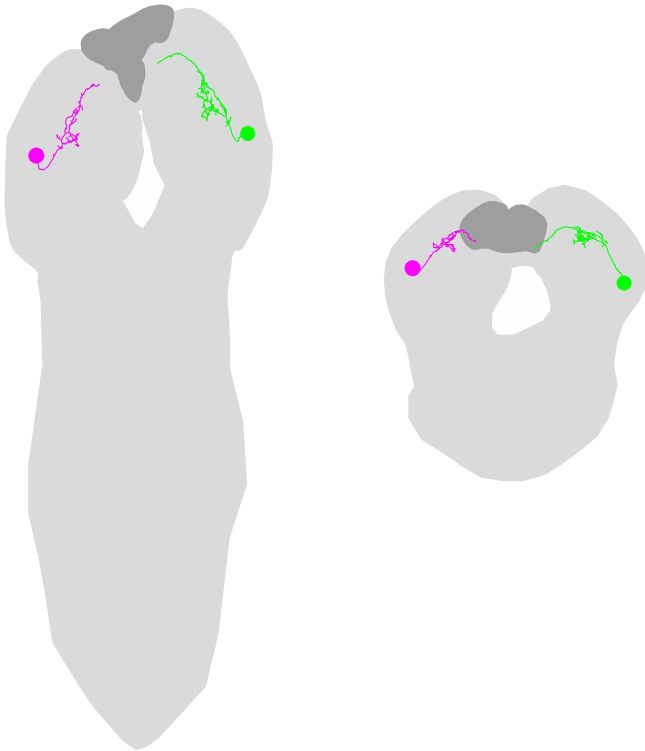

|                   | synapses to |   | synapses from |   |
|-------------------|-------------|---|---------------|---|
| hugin-PC right 1  | 4           | 0 | 0             | 0 |
| hugin-PC right 2  | 2           | 0 | 0             | 0 |
| hugin-PC right 3  | 0           | 0 | 0             | 0 |
| hugin-PC right 4  | 3           | 0 | 1             | 0 |
| hugin-PC left 1   | 0           | 0 | 0             | 0 |
| hugin-PC left 2   | 0           | 5 | 0             | 0 |
| hugin-PC left 3   | 0           | 0 | 0             | 0 |
| hugin-PC left 4   | 0           | 0 | 0             | 0 |
| hugin-RG right 1  | 0           | 0 | 0             | 0 |
| hugin-RG right 2  | 0           | 0 | 0             | 0 |
| hugin-RG left 1   | 0           | 0 | 0             | 0 |
| hugin-RG left 2   | 0           | 0 | 0             | 0 |
| hugin-VNC right 1 | 0           | 0 | 0             | 0 |
| hugin-VNC right 2 | 0           | 0 | 0             | 0 |
| hugin-VNC left 1  | 0           | 0 | 0             | 0 |
| hugin-VNC left 2  | 0           | 0 | 0             | 0 |
| hugin-PH right 1  | 0           | 0 | 0             | 0 |
| hugin-PH right 2  | 0           | 0 | 0             | 0 |
| hugin-PH left 1   | 0           | 0 | 0             | 0 |
| hugin-PH left 2   | 0           | 0 | 0             | 0 |

2.

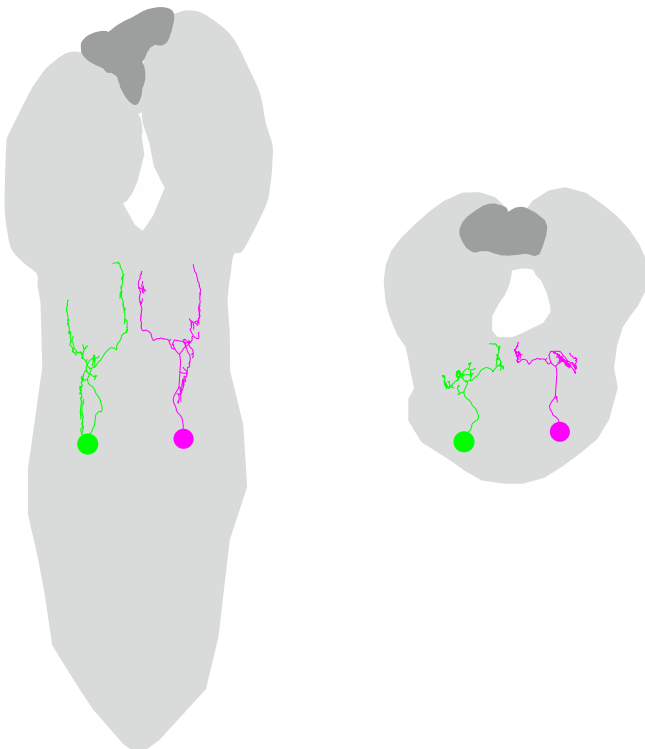

|                   | synapses to |   | synapses from |   |
|-------------------|-------------|---|---------------|---|
| hugin-PC right 1  | 0           | 0 | 0             | 0 |
| hugin-PC right 2  | 0           | 0 | 0             | 0 |
| hugin-PC right 3  | 0           | 0 | 0             | 0 |
| hugin-PC right 4  | 0           | 0 | 0             | 0 |
| hugin-PC left 1   | 0           | 0 | 0             | 0 |
| hugin-PC left 2   | 0           | 0 | 0             | 0 |
| hugin-PC left 3   | 0           | 0 | 0             | 0 |
| hugin-PC left 4   | 0           | 0 | 0             | 0 |
| hugin-RG right 1  | 0           | 0 | 0             | 0 |
| hugin-RG right 2  | 0           | 0 | 0             | 0 |
| hugin-RG left 1   | 0           | 0 | 0             | 0 |
| hugin-RG left 2   | 0           | 0 | 0             | 0 |
| hugin-VNC right 1 | 0           | 0 | 5             | 0 |
| hugin-VNC right 2 | 0           | 0 | 4             | 0 |
| hugin-VNC left 1  | 0           | 0 | 0             | 1 |
| hugin-VNC left 2  | 0           | 0 | 0             | 3 |
| hugin-PH right 1  | 0           | 0 | 0             | 0 |
| hugin-PH right 2  | 0           | 0 | 0             | 0 |
| hugin-PH left 1   | 0           | 0 | 0             | 0 |
| hugin-PH left 2   | 0           | 0 | 0             | 0 |

3.

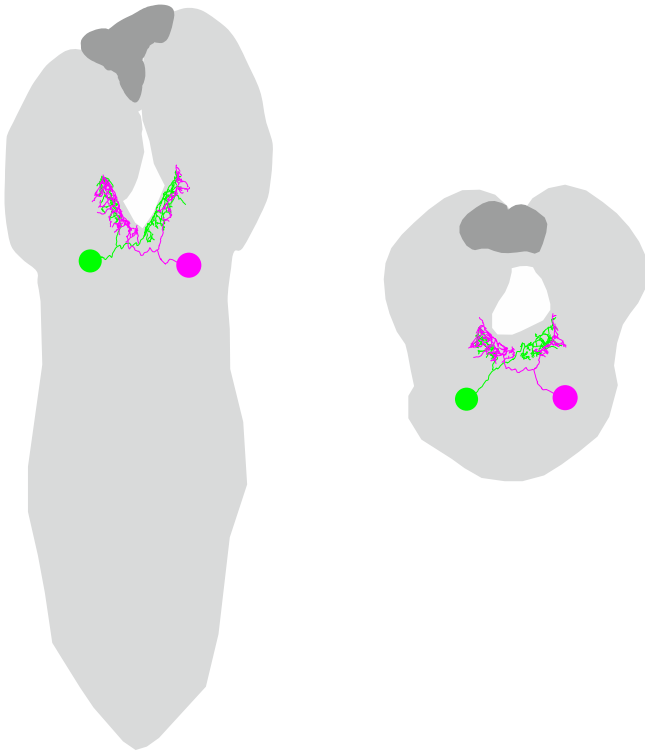

|                   | synapses to |   | synapses from |   |
|-------------------|-------------|---|---------------|---|
| hugin-PC right 1  | 0           | 0 | 0             | 0 |
| hugin-PC right 2  | 0           | 0 | 1             | 2 |
| hugin-PC right 3  | 0           | 1 | 0             | 0 |
| hugin-PC right 4  | 0           | 0 | 1             | 1 |
| hugin-PC left 1   | 0           | 1 | 2             | 3 |
| hugin-PC left 2   | 0           | 0 | 1             | 1 |
| hugin-PC left 3   | 1           | 1 | 3             | 0 |
| hugin-PC left 4   | 1           | 0 | 1             | 0 |
| hugin-RG right 1  | 0           | 0 | 0             | 0 |
| hugin-RG right 2  | 0           | 0 | 0             | 0 |
| hugin-RG left 1   | 0           | 0 | 0             | 0 |
| hugin-RG left 2   | 0           | 0 | 0             | 0 |
| hugin-VNC right 1 | 0           | 0 | 0             | 0 |
| hugin-VNC right 2 | 0           | 0 | 0             | 0 |
| hugin-VNC left 1  | 0           | 0 | 0             | 0 |
| hugin-VNC left 2  | 0           | 0 | 0             | 0 |
| hugin-PH right 1  | 0           | 0 | 0             | 0 |
| hugin-PH right 2  | 0           | 0 | 0             | 0 |
| hugin-PH left 1   | 0           | 0 | 0             | 0 |
| hugin-PH left 2   | 0           | 0 | 0             | 0 |

4.

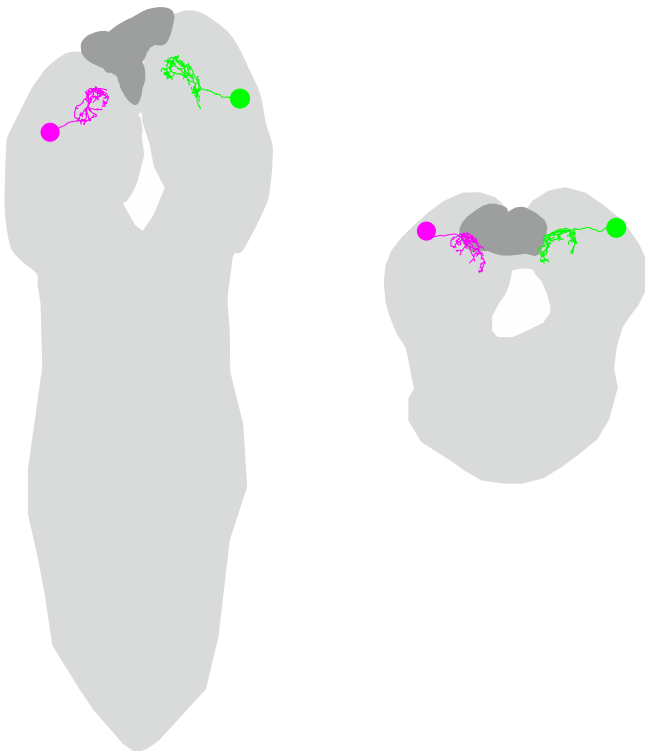

|                   | synapses to |   | synapses from |   |
|-------------------|-------------|---|---------------|---|
| hugin-PC right 1  | 4           | 0 | 2             | 0 |
| hugin-PC right 2  | 2           | 0 | 0             | 0 |
| hugin-PC right 3  | 3           | 0 | 0             | 0 |
| hugin-PC right 4  | 5           | 0 | 0             | 0 |
| hugin-PC left 1   | 0           | 4 | 0             | 0 |
| hugin-PC left 2   | 0           | 1 | 0             | 0 |
| hugin-PC left 3   | 0           | 1 | 0             | 0 |
| hugin-PC left 4   | 0           | 6 | 0             | 0 |
| hugin-RG right 1  | 0           | 0 | 0             | 0 |
| hugin-RG right 2  | 0           | 0 | 0             | 0 |
| hugin-RG left 1   | 0           | 0 | 0             | 0 |
| hugin-RG left 2   | 0           | 0 | 0             | 0 |
| hugin-VNC right 1 | 0           | 0 | 0             | 0 |
| hugin-VNC right 2 | 0           | 0 | 0             | 0 |
| hugin-VNC left 1  | 0           | 0 | 0             | 0 |
| hugin-VNC left 2  | 0           | 0 | 0             | 0 |
| hugin-PH right 1  | 0           | 0 | 0             | 0 |
| hugin-PH right 2  | 0           | 0 | 0             | 0 |
| hugin-PH left 1   | 0           | 0 | 0             | 0 |
| hugin-PH left 2   | 0           | 0 | 0             | 0 |

5.

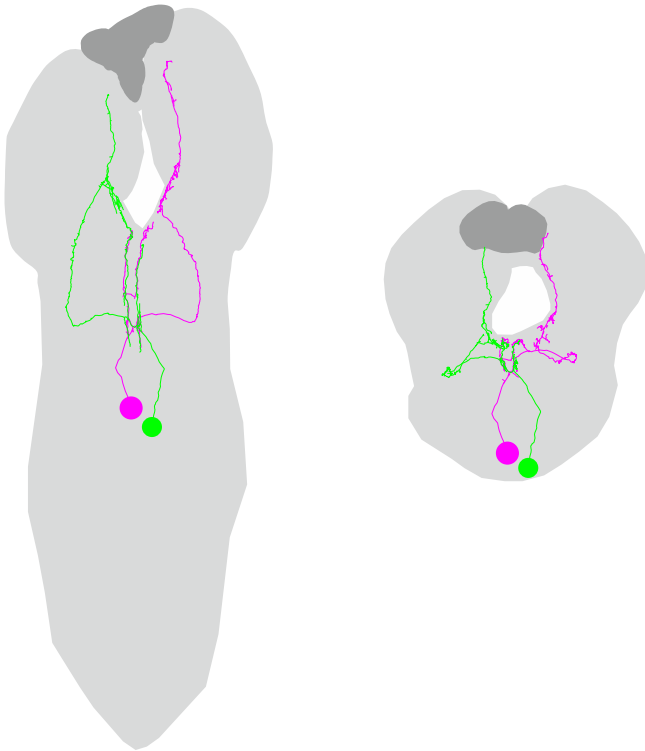

|                   | synapses to |   | synapses from |   |
|-------------------|-------------|---|---------------|---|
| hugin-PC right 1  | 0           | 0 | 0             | 0 |
| hugin-PC right 2  | 0           | 7 | 0             | 1 |
| hugin-PC right 3  | 0           | 2 | 0             | 2 |
| hugin-PC right 4  | 0           | 2 | 0             | 0 |
| hugin-PC left 1   | 0           | 0 | 0             | 0 |
| hugin-PC left 2   | 0           | 0 | 0             | 0 |
| hugin-PC left 3   | 1           | 0 | 0             | 0 |
| hugin-PC left 4   | 4           | 0 | 0             | 0 |
| hugin-RG right 1  | 0           | 1 | 0             | 0 |
| hugin-RG right 2  | 0           | 3 | 0             | 0 |
| hugin-RG left 1   | 0           | 0 | 0             | 0 |
| hugin-RG left 2   | 1           | 0 | 0             | 0 |
| hugin-VNC right 1 | 0           | 0 | 1             | 0 |
| hugin-VNC right 2 | 2           | 0 | 0             | 0 |
| hugin-VNC left 1  | 0           | 0 | 0             | 0 |
| hugin-VNC left 2  | 0           | 0 | 0             | 0 |
| hugin-PH right 1  | 0           | 0 | 0             | 0 |
| hugin-PH right 2  | 0           | 0 | 0             | 0 |
| hugin-PH left 1   | 0           | 0 | 0             | 0 |
| hugin-PH left 2   | 0           | 0 | 0             | 0 |

6.

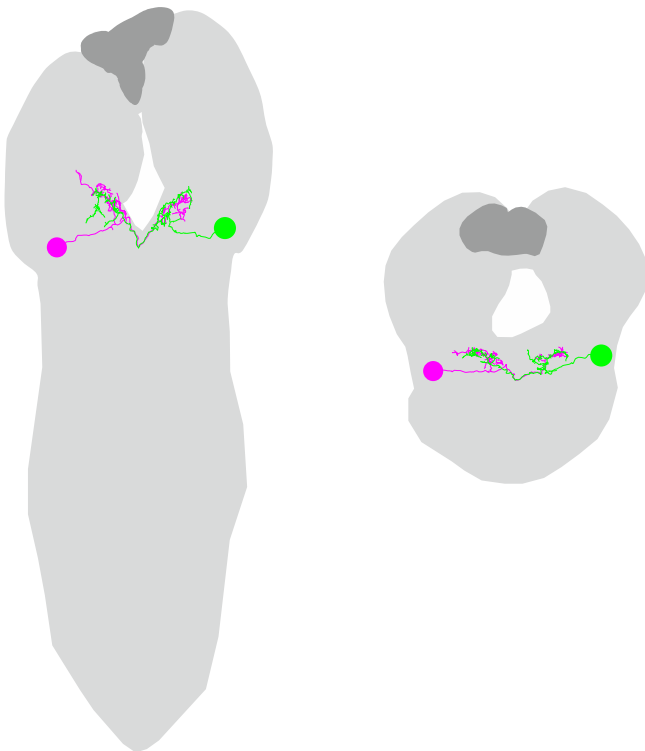

|                   | synapses to |    | synapses from |   |
|-------------------|-------------|----|---------------|---|
| hugin-PC right 1  | 0           | 5  | 2             | 0 |
| hugin-PC right 2  | 0           | 4  | 0             | 1 |
| hugin-PC right 3  | 0           | 2  | 0             | 1 |
| hugin-PC right 4  | 0           | 10 | 1             | 1 |
| hugin-PC left 1   | 4           | 0  | 0             | 0 |
| hugin-PC left 2   | 3           | 0  | 0             | 0 |
| hugin-PC left 3   | 4           | 0  | 1             | 0 |
| hugin-PC left 4   | 9           | 1  | 2             | 0 |
| hugin-RG right 1  | 0           | 0  | 0             | 0 |
| hugin-RG right 2  | 0           | 0  | 0             | 0 |
| hugin-RG left 1   | 0           | 0  | 0             | 0 |
| hugin-RG left 2   | 0           | 0  | 0             | 0 |
| hugin-VNC right 1 | 0           | 0  | 0             | 0 |
| hugin-VNC right 2 | 0           | 0  | 0             | 0 |
| hugin-VNC left 1  | 0           | 0  | 0             | 0 |
| hugin-VNC left 2  | 0           | 0  | 0             | 0 |
| hugin-PH right 1  | 0           | 0  | 0             | 0 |
| hugin-PH right 2  | 0           | 0  | 0             | 0 |
| hugin-PH left 1   | 0           | 0  | 0             | 0 |
| hugin-PH left 2   | 0           | 0  | 0             | 0 |

7.

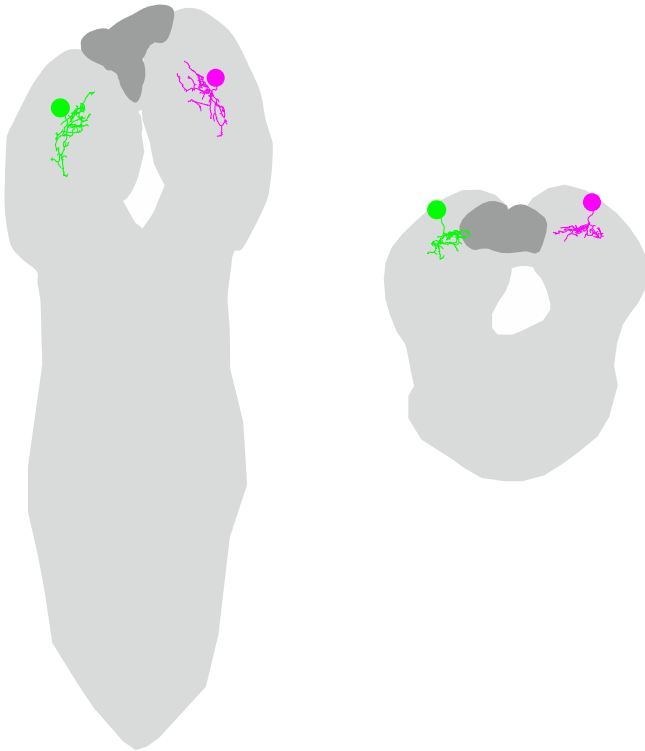

|                   | synapses to |   | synapses from |   |
|-------------------|-------------|---|---------------|---|
| hugin-PC right 1  | 0           | 0 | 0             | 0 |
| hugin-PC right 2  | 0           | 1 | 0             | 0 |
| hugin-PC right 3  | 0           | 0 | 0             | 0 |
| hugin-PC right 4  | 0           | 6 | 0             | 2 |
| hugin-PC left 1   | 1           | 0 | 0             | 0 |
| hugin-PC left 2   | 3           | 0 | 1             | 0 |
| hugin-PC left 3   | 0           | 0 | 0             | 0 |
| hugin-PC left 4   | 2           | 0 | 0             | 0 |
| hugin-RG right 1  | 0           | 0 | 0             | 0 |
| hugin-RG right 2  | 0           | 0 | 0             | 0 |
| hugin-RG left 1   | 0           | 0 | 0             | 0 |
| hugin-RG left 2   | 0           | 0 | 0             | 0 |
| hugin-VNC right 1 | 0           | 0 | 0             | 0 |
| hugin-VNC right 2 | 0           | 0 | 0             | 0 |
| hugin-VNC left 1  | 0           | 0 | 0             | 0 |
| hugin-VNC left 2  | 0           | 0 | 0             | 0 |
| hugin-PH right 1  | 0           | 0 | 0             | 0 |
| hugin-PH right 2  | 0           | 0 | 0             | 0 |
| hugin-PH left 1   | 0           | 0 | 0             | 0 |
| hugin-PH left 2   | 0           | 0 | 0             | 0 |

8.

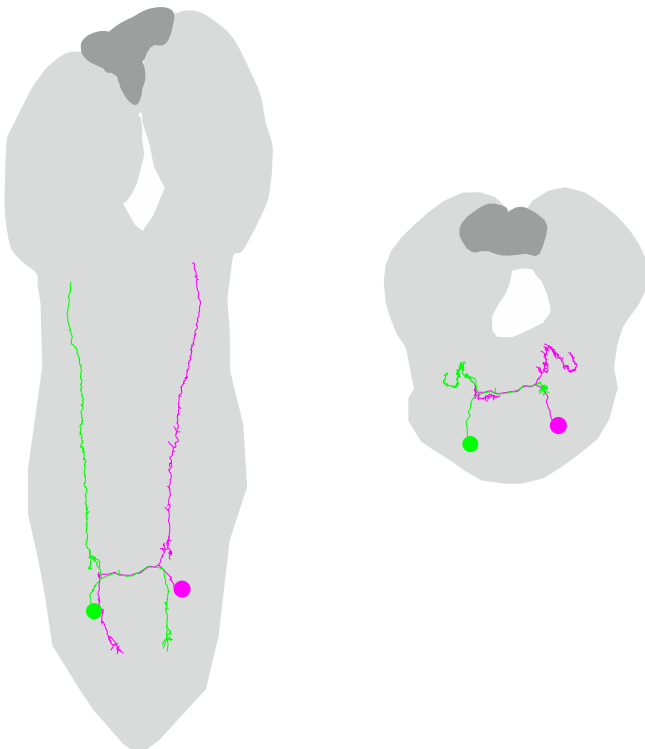

|                   | synapses to |    | synapses from |   |
|-------------------|-------------|----|---------------|---|
| hugin-PC right 1  | 0           | 0  | 0             | 0 |
| hugin-PC right 2  | 0           | 0  | 0             | 0 |
| hugin-PC right 3  | 0           | 0  | 0             | 0 |
| hugin-PC right 4  | 0           | 0  | 0             | 0 |
| hugin-PC left 1   | 0           | 0  | 0             | 0 |
| hugin-PC left 2   | 0           | 0  | 0             | 0 |
| hugin-PC left 3   | 0           | 0  | 0             | 0 |
| hugin-PC left 4   | 0           | 0  | 0             | 0 |
| hugin-RG right 1  | 0           | 0  | 0             | 0 |
| hugin-RG right 2  | 0           | 0  | 0             | 0 |
| hugin-RG left 1   | 0           | 0  | 0             | 0 |
| hugin-RG left 2   | 0           | 0  | 0             | 0 |
| hugin-VNC right 1 | 8           | 0  | 2             | 0 |
| hugin-VNC right 2 | 8           | 0  | 1             | 0 |
| hugin-VNC left 1  | 0           | 8  | 0             | 4 |
| hugin-VNC left 2  | 0           | 13 | 0             | 3 |
| hugin-PH right 1  | 0           | 0  | 0             | 0 |
| hugin-PH right 2  | 0           | 0  | 0             | 0 |
| hugin-PH left 1   | 0           | 0  | 0             | 0 |
| hugin-PH left 2   | 0           | 0  | 0             | 0 |

9.

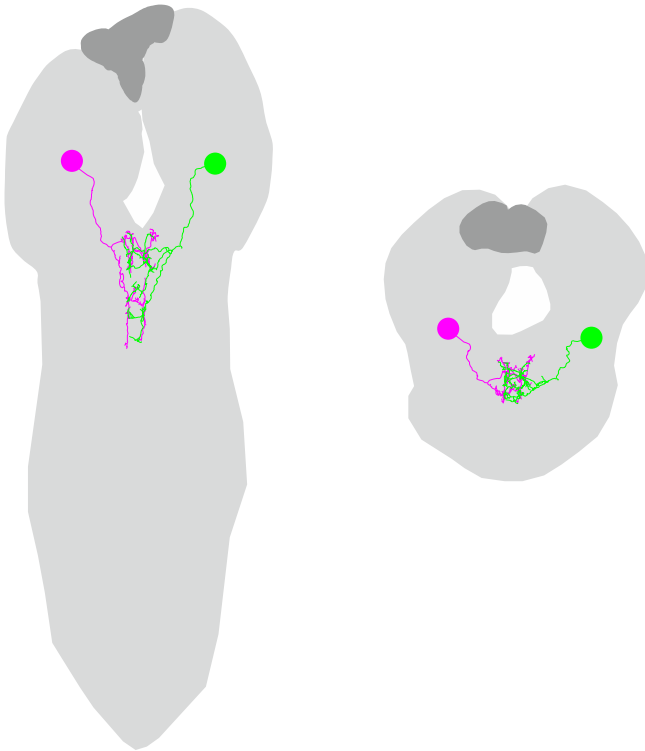

|                   | synapses to |   | synapses from |   |
|-------------------|-------------|---|---------------|---|
| hugin-PC right 1  | 0           | 0 | 0             | 0 |
| hugin-PC right 2  | 0           | 0 | 0             | 0 |
| hugin-PC right 3  | 0           | 0 | 0             | 0 |
| hugin-PC right 4  | 0           | 0 | 0             | 0 |
| hugin-PC left 1   | 0           | 0 | 0             | 0 |
| hugin-PC left 2   | 0           | 0 | 0             | 0 |
| hugin-PC left 3   | 0           | 0 | 0             | 0 |
| hugin-PC left 4   | 0           | 0 | 0             | 0 |
| hugin-RG right 1  | 0           | 0 | 0             | 0 |
| hugin-RG right 2  | 0           | 0 | 0             | 0 |
| hugin-RG left 1   | 0           | 0 | 0             | 0 |
| hugin-RG left 2   | 0           | 0 | 0             | 0 |
| hugin-VNC right 1 | 0           | 0 | 0             | 0 |
| hugin-VNC right 2 | 0           | 0 | 0             | 0 |
| hugin-VNC left 1  | 0           | 0 | 0             | 0 |
| hugin-VNC left 2  | 0           | 0 | 0             | 0 |
| hugin-PH right 1  | 0           | 2 | 0             | 0 |
| hugin-PH right 2  | 0           | 1 | 0             | 0 |
| hugin-PH left 1   | 0           | 0 | 0             | 0 |
| hugin-PH left 2   | 5           | 2 | 0             | 0 |

10.

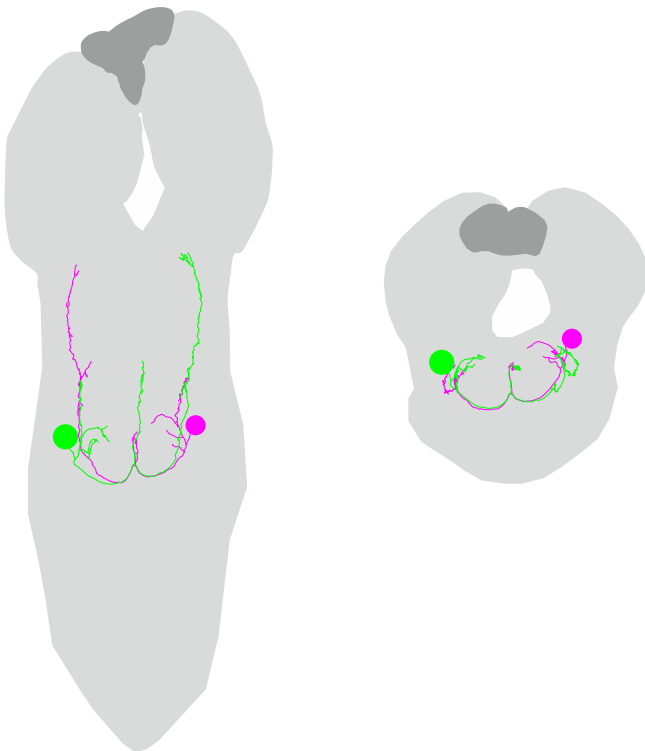

|                   | synapses to |   | synapses from |   |
|-------------------|-------------|---|---------------|---|
| hugin-PC right 1  | 0           | 0 | 0             | 0 |
| hugin-PC right 2  | 0           | 0 | 0             | 0 |
| hugin-PC right 3  | 0           | 0 | 0             | 0 |
| hugin-PC right 4  | 0           | 0 | 0             | 0 |
| hugin-PC left 1   | 0           | 0 | 0             | 0 |
| hugin-PC left 2   | 0           | 0 | 0             | 0 |
| hugin-PC left 3   | 0           | 0 | 0             | 0 |
| hugin-PC left 4   | 0           | 0 | 0             | 0 |
| hugin-RG right 1  | 0           | 0 | 0             | 0 |
| hugin-RG right 2  | 0           | 0 | 0             | 0 |
| hugin-RG left 1   | 0           | 0 | 0             | 0 |
| hugin-RG left 2   | 0           | 0 | 0             | 0 |
| hugin-VNC right 1 | 0           | 1 | 1             | 1 |
| hugin-VNC right 2 | 0           | 1 | 1             | 0 |
| hugin-VNC left 1  | 0           | 0 | 1             | 2 |
| hugin-VNC left 2  | 4           | 0 | 1             | 2 |
| hugin-PH right 1  | 0           | 0 | 0             | 0 |
| hugin-PH right 2  | 0           | 0 | 0             | 0 |
| hugin-PH left 1   | 0           | 0 | 0             | 0 |
| hugin-PH left 2   | 0           | 0 | 0             | 0 |

11.

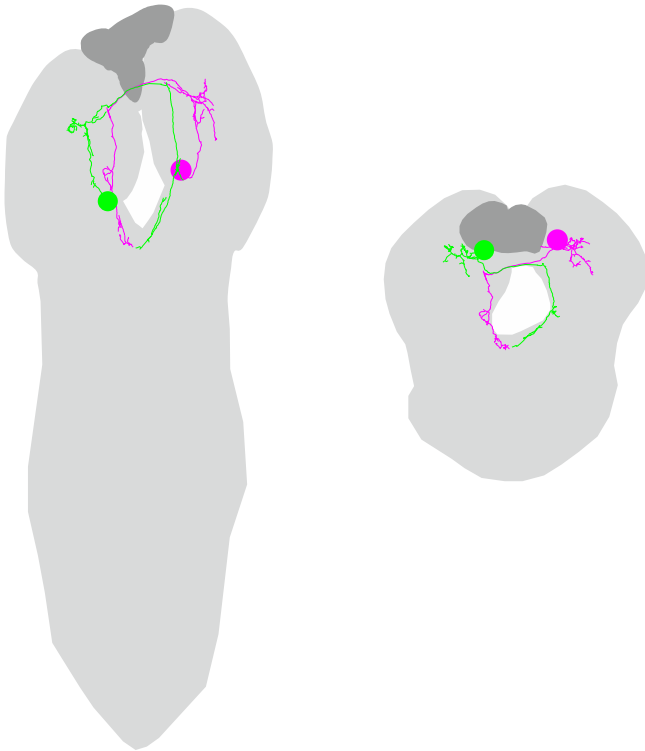

|                   | synapses to |    | synapses from |   |
|-------------------|-------------|----|---------------|---|
| hugin-PC right 1  | 0           | 0  | 0             | 0 |
| hugin-PC right 2  | 0           | 0  | 0             | 0 |
| hugin-PC right 3  | 0           | 0  | 0             | 0 |
| hugin-PC right 4  | 0           | 0  | 0             | 0 |
| hugin-PC left 1   | 0           | 0  | 0             | 0 |
| hugin-PC left 2   | 0           | 0  | 0             | 0 |
| hugin-PC left 3   | 0           | 2  | 0             | 0 |
| hugin-PC left 4   | 0           | 0  | 0             | 0 |
| hugin-RG right 1  | 6           | 5  | 0             | 0 |
| hugin-RG right 2  | 8           | 5  | 0             | 0 |
| hugin-RG left 1   | 2           | 11 | 0             | 0 |
| hugin-RG left 2   | 2           | 12 | 0             | 0 |
| hugin-VNC right 1 | 0           | 0  | 0             | 0 |
| hugin-VNC right 2 | 0           | 2  | 0             | 0 |
| hugin-VNC left 1  | 0           | 0  | 0             | 0 |
| hugin-VNC left 2  | 0           | 0  | 0             | 0 |
| hugin-PH right 1  | 0           | 0  | 0             | 0 |
| hugin-PH right 2  | 0           | 0  | 0             | 0 |
| hugin-PH left 1   | 0           | 0  | 0             | 0 |
| hugin-PH left 2   | 0           | 0  | 0             | 0 |

12.

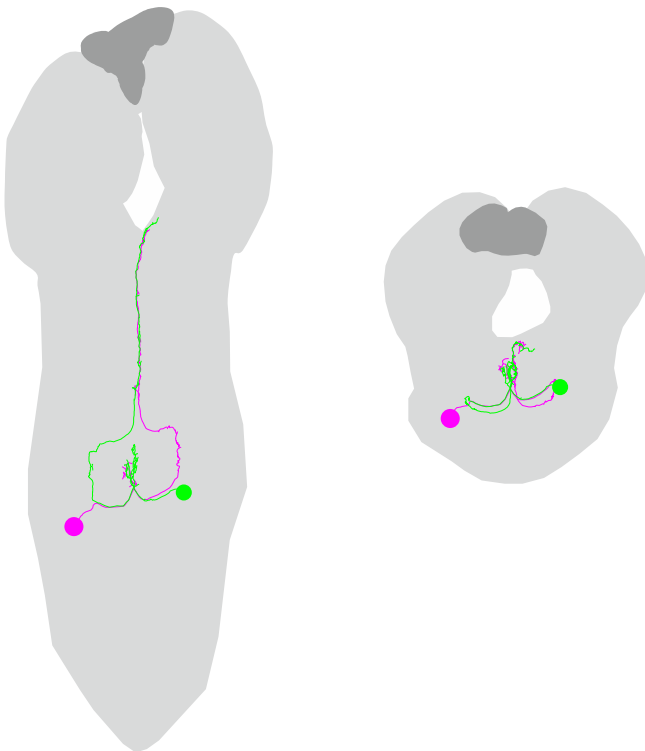

|                   | synapses to |   | synapses from |   |
|-------------------|-------------|---|---------------|---|
| hugin-PC right 1  | 0           | 0 | 0             | 0 |
| hugin-PC right 2  | 0           | 0 | 0             | 0 |
| hugin-PC right 3  | 0           | 0 | 0             | 0 |
| hugin-PC right 4  | 0           | 0 | 0             | 0 |
| hugin-PC left 1   | 0           | 0 | 0             | 0 |
| hugin-PC left 2   | 0           | 0 | 0             | 0 |
| hugin-PC left 3   | 0           | 0 | 0             | 0 |
| hugin-PC left 4   | 0           | 0 | 0             | 0 |
| hugin-RG right 1  | 0           | 1 | 0             | 0 |
| hugin-RG right 2  | 0           | 0 | 0             | 0 |
| hugin-RG left 1   | 0           | 0 | 0             | 0 |
| hugin-RG left 2   | 0           | 0 | 0             | 0 |
| hugin-VNC right 1 | 4           | 2 | 0             | 0 |
| hugin-VNC right 2 | 0           | 0 | 0             | 0 |
| hugin-VNC left 1  | 2           | 3 | 0             | 0 |
| hugin-VNC left 2  | 1           | 1 | 0             | 0 |
| hugin-PH right 1  | 0           | 0 | 0             | 0 |
| hugin-PH right 2  | 0           | 0 | 0             | 0 |
| hugin-PH left 1   | 0           | 0 | 0             | 0 |
| hugin-PH left 2   | 0           | 0 | 0             | 0 |



13.

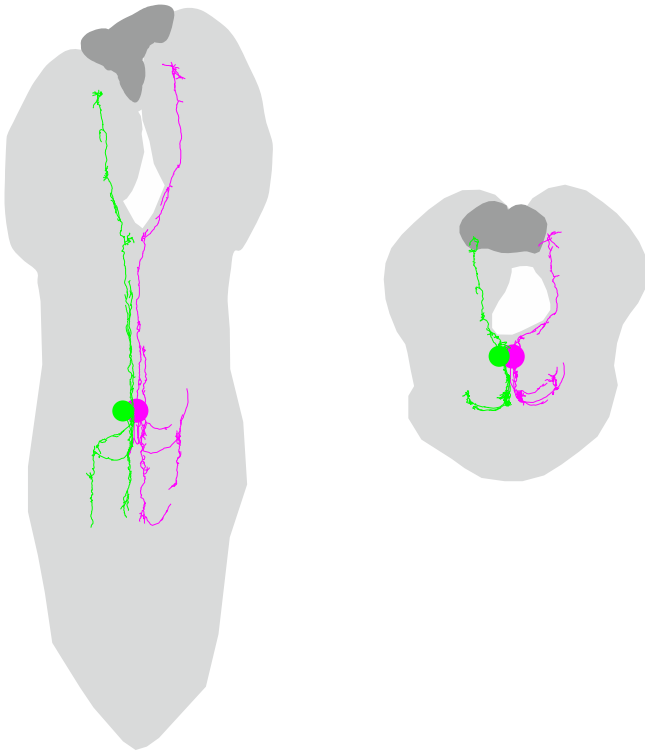

|                   | synapses to |   | synapses from |   |
|-------------------|-------------|---|---------------|---|
| hugin-PC right 1  | 0           | 0 | 0             | 0 |
| hugin-PC right 2  | 0           | 0 | 0             | 0 |
| hugin-PC right 3  | 0           | 0 | 0             | 0 |
| hugin-PC right 4  | 0           | 0 | 0             | 0 |
| hugin-PC left 1   | 0           | 0 | 0             | 0 |
| hugin-PC left 2   | 1           | 0 | 0             | 0 |
| hugin-PC left 3   | 4           | 0 | 0             | 0 |
| hugin-PC left 4   | 0           | 0 | 0             | 0 |
| hugin-RG right 1  | 1           | 2 | 0             | 0 |
| hugin-RG right 2  | 1           | 3 | 0             | 0 |
| hugin-RG left 1   | 8           | 2 | 0             | 0 |
| hugin-RG left 2   | 0           | 0 | 0             | 0 |
| hugin-VNC right 1 | 2           | 5 | 0             | 0 |
| hugin-VNC right 2 | 10          | 0 | 0             | 0 |
| hugin-VNC left 1  | 5           | 4 | 0             | 0 |
| hugin-VNC left 2  | 0           | 1 | 0             | 0 |
| hugin-PH right 1  | 0           | 0 | 0             | 0 |
| hugin-PH right 2  | 0           | 0 | 0             | 0 |
| hugin-PH left 1   | 0           | 0 | 0             | 0 |
| hugin-PH left 2   | 0           | 0 | 0             | 0 |

14.

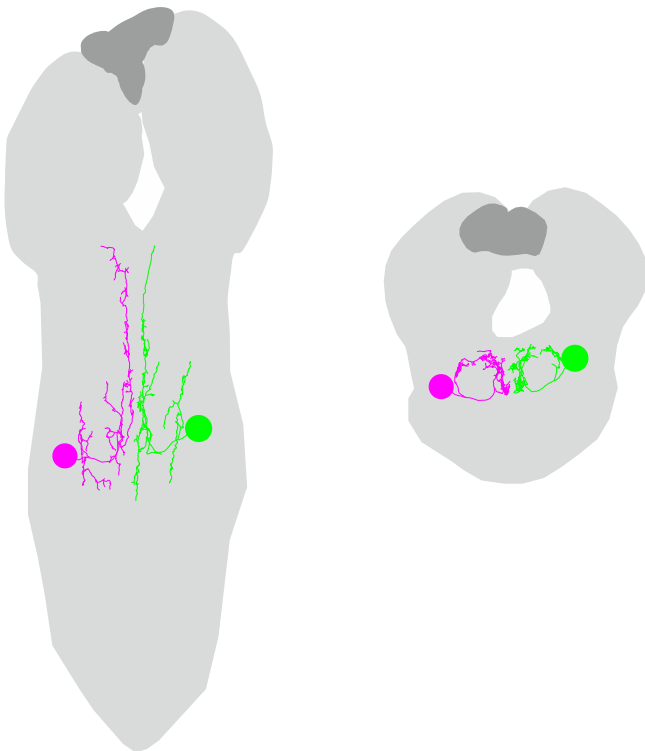

|                   | synapses to |   | synapses from |   |
|-------------------|-------------|---|---------------|---|
| hugin-PC right 1  | 0           | 0 | 0             | 0 |
| hugin-PC right 2  | 0           | 0 | 0             | 0 |
| hugin-PC right 3  | 0           | 0 | 0             | 0 |
| hugin-PC right 4  | 0           | 0 | 0             | 0 |
| hugin-PC left 1   | 0           | 0 | 0             | 0 |
| hugin-PC left 2   | 0           | 0 | 0             | 0 |
| hugin-PC left 3   | 0           | 0 | 0             | 0 |
| hugin-PC left 4   | 0           | 0 | 0             | 0 |
| hugin-RG right 1  | 0           | 0 | 0             | 0 |
| hugin-RG right 2  | 0           | 0 | 0             | 0 |
| hugin-RG left 1   | 0           | 0 | 0             | 0 |
| hugin-RG left 2   | 0           | 0 | 0             | 0 |
| hugin-VNC right 1 | 0           | 0 | 0             | 5 |
| hugin-VNC right 2 | 0           | 0 | 0             | 3 |
| hugin-VNC left 1  | 0           | 0 | 5             | 0 |
| hugin-VNC left 2  | 0           | 0 | 2             | 0 |
| hugin-PH right 1  | 0           | 0 | 0             | 0 |
| hugin-PH right 2  | 0           | 0 | 0             | 0 |
| hugin-PH left 1   | 0           | 0 | 0             | 0 |
| hugin-PH left 2   | 0           | 0 | 0             | 0 |

15.

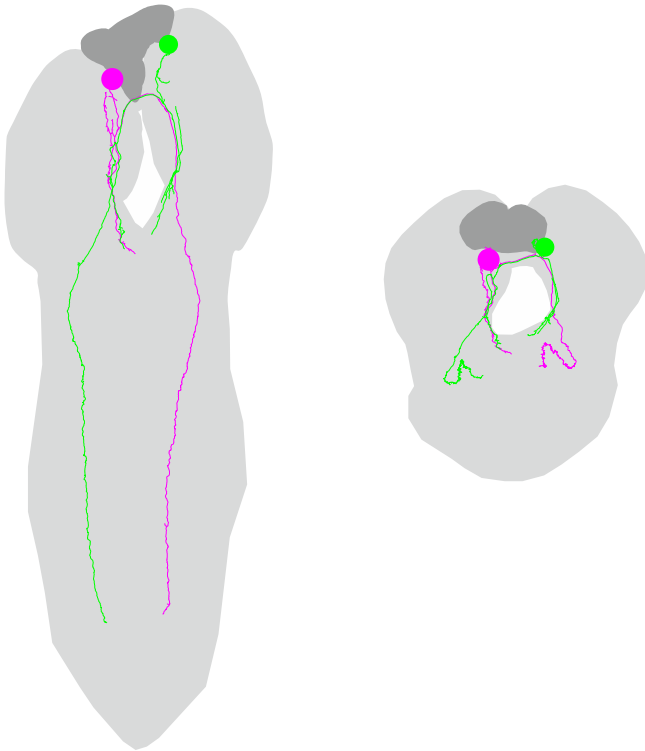

|                   | synapses to |   | synapses from |   |
|-------------------|-------------|---|---------------|---|
| hugin-PC right 1  | 0           | 0 | 0             | 0 |
| hugin-PC right 2  | 0           | 0 | 0             | 0 |
| hugin-PC right 3  | 0           | 0 | 0             | 0 |
| hugin-PC right 4  | 0           | 0 | 0             | 0 |
| hugin-PC left 1   | 0           | 0 | 0             | 0 |
| hugin-PC left 2   | 0           | 0 | 0             | 0 |
| hugin-PC left 3   | 0           | 0 | 0             | 0 |
| hugin-PC left 4   | 0           | 0 | 0             | 0 |
| hugin-RG right 1  | 0           | 0 | 0             | 0 |
| hugin-RG right 2  | 0           | 0 | 0             | 0 |
| hugin-RG left 1   | 0           | 0 | 0             | 0 |
| hugin-RG left 2   | 0           | 0 | 0             | 0 |
| hugin-VNC right 1 | 4           | 0 | 0             | 0 |
| hugin-VNC right 2 | 6           | 0 | 1             | 0 |
| hugin-VNC left 1  | 0           | 4 | 0             | 0 |
| hugin-VNC left 2  | 0           | 3 | 0             | 1 |
| hugin-PH right 1  | 0           | 0 | 0             | 0 |
| hugin-PH right 2  | 0           | 0 | 0             | 0 |
| hugin-PH left 1   | 0           | 0 | 0             | 0 |
| hugin-PH left 2   | 0           | 0 | 0             | 0 |

16.

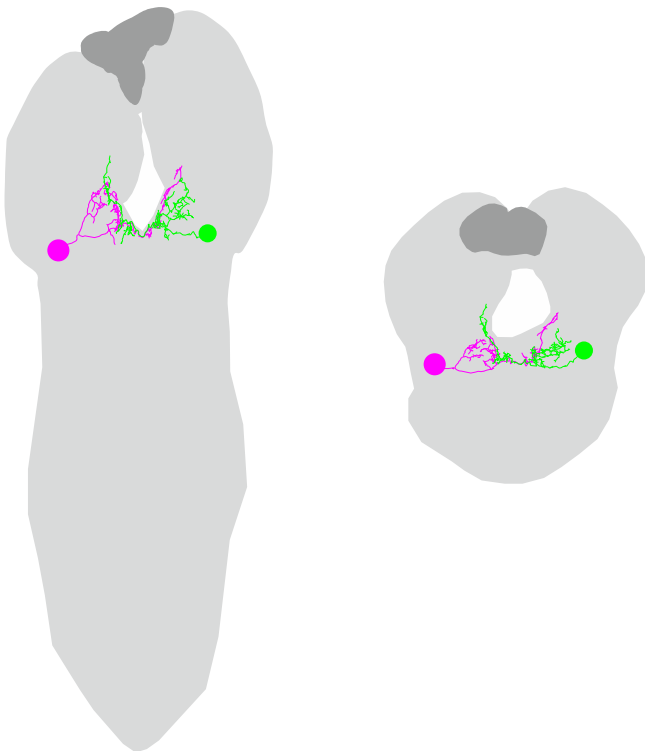

|                   | synapses to |   | synapses from |   |
|-------------------|-------------|---|---------------|---|
| hugin-PC right 1  | 0           | 2 | 2             | 0 |
| hugin-PC right 2  | 0           | 1 | 0             | 0 |
| hugin-PC right 3  | 0           | 2 | 2             | 0 |
| hugin-PC right 4  | 0           | 1 | 2             | 0 |
| hugin-PC left 1   | 4           | 0 | 1             | 0 |
| hugin-PC left 2   | 2           | 0 | 1             | 1 |
| hugin-PC left 3   | 5           | 0 | 2             | 1 |
| hugin-PC left 4   | 5           | 1 | 0             | 1 |
| hugin-RG right 1  | 0           | 0 | 0             | 0 |
| hugin-RG right 2  | 0           | 0 | 0             | 0 |
| hugin-RG left 1   | 0           | 0 | 0             | 0 |
| hugin-RG left 2   | 0           | 0 | 0             | 0 |
| hugin-VNC right 1 | 0           | 0 | 0             | 0 |
| hugin-VNC right 2 | 0           | 0 | 0             | 0 |
| hugin-VNC left 1  | 0           | 0 | 0             | 0 |
| hugin-VNC left 2  | 0           | 0 | 0             | 0 |
| hugin-PH right 1  | 0           | 0 | 0             | 0 |
| hugin-PH right 2  | 0           | 0 | 0             | 0 |
| hugin-PH left 1   | 0           | 0 | 0             | 0 |
| hugin-PH left 2   | 0           | 0 | 0             | 0 |

17.

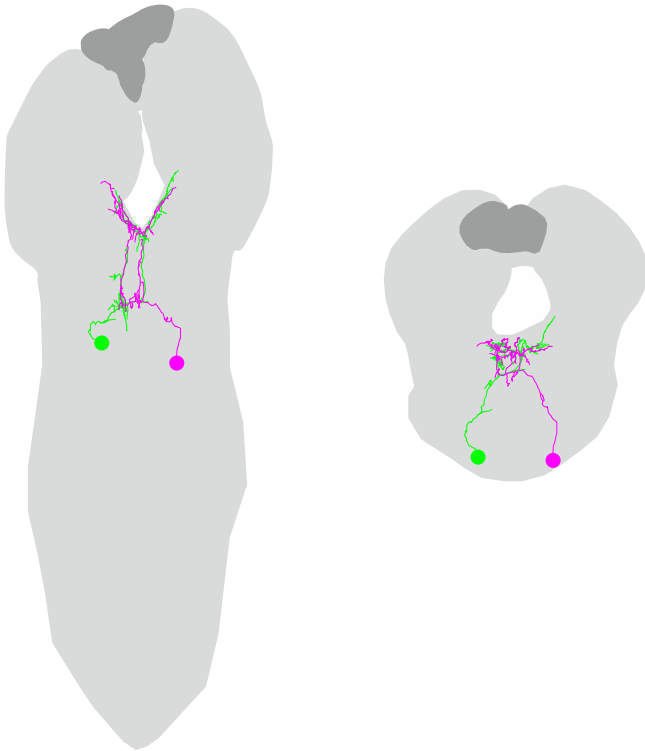

|                   | synapses to |   | synapses from |   |
|-------------------|-------------|---|---------------|---|
| hugin-PC right 1  | 0           | 0 | 0             | 0 |
| hugin-PC right 2  | 0           | 0 | 0             | 0 |
| hugin-PC right 3  | 0           | 0 | 0             | 0 |
| hugin-PC right 4  | 1           | 0 | 0             | 0 |
| hugin-PC left 1   | 0           | 0 | 0             | 1 |
| hugin-PC left 2   | 1           | 0 | 1             | 0 |
| hugin-PC left 3   | 0           | 0 | 0             | 0 |
| hugin-PC left 4   | 0           | 0 | 0             | 0 |
| hugin-RG right 1  | 0           | 0 | 0             | 0 |
| hugin-RG right 2  | 0           | 0 | 0             | 0 |
| hugin-RG left 1   | 0           | 0 | 0             | 0 |
| hugin-RG left 2   | 0           | 0 | 0             | 0 |
| hugin-VNC right 1 | 5           | 1 | 0             | 0 |
| hugin-VNC right 2 | 2           | 3 | 0             | 0 |
| hugin-VNC left 1  | 4           | 3 | 0             | 0 |
| hugin-VNC left 2  | 0           | 1 | 0             | 0 |
| hugin-PH right 1  | 0           | 0 | 0             | 0 |
| hugin-PH right 2  | 0           | 0 | 0             | 0 |
| hugin-PH left 1   | 0           | 0 | 0             | 0 |
| hugin-PH left 2   | 0           | 0 | 0             | 0 |

18.

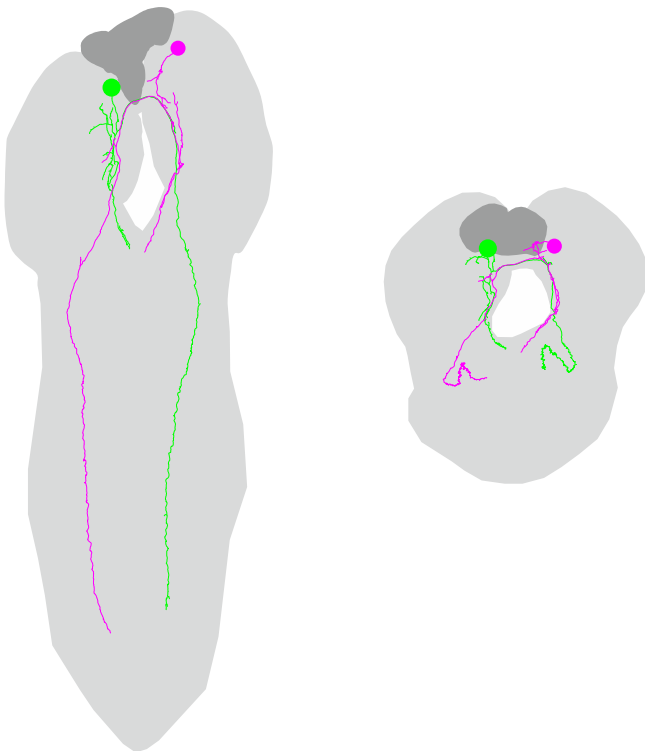

|                   | synapses to |   | synapses from |   |
|-------------------|-------------|---|---------------|---|
| hugin-PC right 1  | 0           | 0 | 0             | 0 |
| hugin-PC right 2  | 0           | 0 | 0             | 0 |
| hugin-PC right 3  | 0           | 0 | 0             | 0 |
| hugin-PC right 4  | 0           | 0 | 0             | 0 |
| hugin-PC left 1   | 0           | 0 | 0             | 0 |
| hugin-PC left 2   | 0           | 0 | 0             | 0 |
| hugin-PC left 3   | 0           | 0 | 0             | 0 |
| hugin-PC left 4   | 0           | 0 | 0             | 0 |
| hugin-RG right 1  | 0           | 0 | 0             | 0 |
| hugin-RG right 2  | 0           | 0 | 0             | 0 |
| hugin-RG left 1   | 0           | 0 | 0             | 0 |
| hugin-RG left 2   | 0           | 0 | 0             | 0 |
| hugin-VNC right 1 | 0           | 4 | 0             | 0 |
| hugin-VNC right 2 | 0           | 5 | 0             | 0 |
| hugin-VNC left 1  | 5           | 0 | 0             | 0 |
| hugin-VNC left 2  | 2           | 0 | 0             | 0 |
| hugin-PH right 1  | 0           | 0 | 0             | 0 |
| hugin-PH right 2  | 0           | 0 | 0             | 0 |
| hugin-PH left 1   | 0           | 0 | 0             | 0 |
| hugin-PH left 2   | 0           | 0 | 0             | 0 |

19.

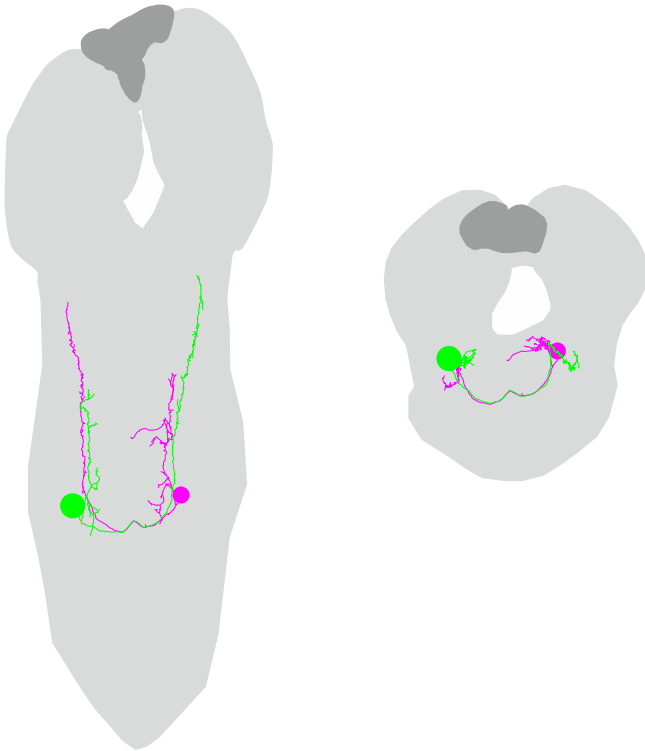

|                   | synapses to |   | synapses from |   |
|-------------------|-------------|---|---------------|---|
| hugin-PC right 1  | 0           | 0 | 0             | 0 |
| hugin-PC right 2  | 0           | 0 | 0             | 0 |
| hugin-PC right 3  | 0           | 0 | 0             | 0 |
| hugin-PC right 4  | 0           | 0 | 0             | 0 |
| hugin-PC left 1   | 0           | 0 | 0             | 0 |
| hugin-PC left 2   | 0           | 0 | 0             | 0 |
| hugin-PC left 3   | 0           | 0 | 0             | 0 |
| hugin-PC left 4   | 0           | 0 | 0             | 0 |
| hugin-RG right 1  | 0           | 0 | 0             | 0 |
| hugin-RG right 2  | 0           | 0 | 0             | 0 |
| hugin-RG left 1   | 0           | 0 | 0             | 0 |
| hugin-RG left 2   | 0           | 0 | 0             | 0 |
| hugin-VNC right 1 | 0           | 3 | 1             | 1 |
| hugin-VNC right 2 | 0           | 2 | 1             | 5 |
| hugin-VNC left 1  | 1           | 0 | 4             | 0 |
| hugin-VNC left 2  | 5           | 0 | 2             | 1 |
| hugin-PH right 1  | 0           | 0 | 0             | 0 |
| hugin-PH right 2  | 0           | 0 | 0             | 0 |
| hugin-PH left 1   | 0           | 0 | 0             | 0 |
| hugin-PH left 2   | 0           | 0 | 0             | 0 |

20.

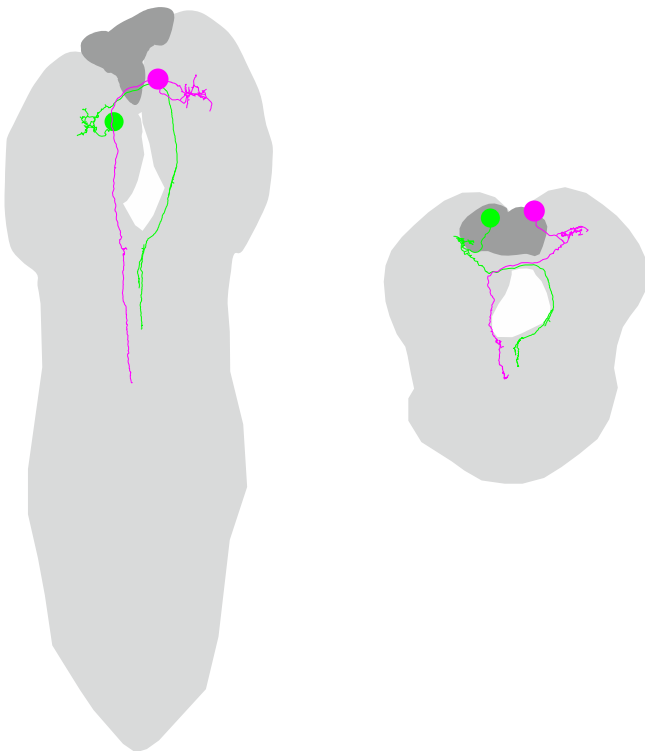

|                   | synapses to |   | synapses from |   |
|-------------------|-------------|---|---------------|---|
| hugin-PC right 1  | 0           | 0 | 0             | 0 |
| hugin-PC right 2  | 0           | 0 | 0             | 0 |
| hugin-PC right 3  | 0           | 0 | 0             | 0 |
| hugin-PC right 4  | 0           | 0 | 0             | 0 |
| hugin-PC left 1   | 0           | 0 | 0             | 0 |
| hugin-PC left 2   | 0           | 0 | 0             | 0 |
| hugin-PC left 3   | 0           | 0 | 0             | 0 |
| hugin-PC left 4   | 0           | 0 | 0             | 0 |
| hugin-RG right 1  | 0           | 0 | 0             | 0 |
| hugin-RG right 2  | 0           | 0 | 0             | 0 |
| hugin-RG left 1   | 0           | 0 | 0             | 0 |
| hugin-RG left 2   | 0           | 0 | 0             | 0 |
| hugin-VNC right 1 | 0           | 0 | 0             | 0 |
| hugin-VNC right 2 | 0           | 0 | 0             | 0 |
| hugin-VNC left 1  | 3           | 0 | 0             | 0 |
| hugin-VNC left 2  | 0           | 0 | 0             | 0 |
| hugin-PH right 1  | 0           | 0 | 0             | 0 |
| hugin-PH right 2  | 0           | 0 | 0             | 0 |
| hugin-PH left 1   | 0           | 0 | 0             | 0 |
| hugin-PH left 2   | 0           | 0 | 0             | 0 |

21.

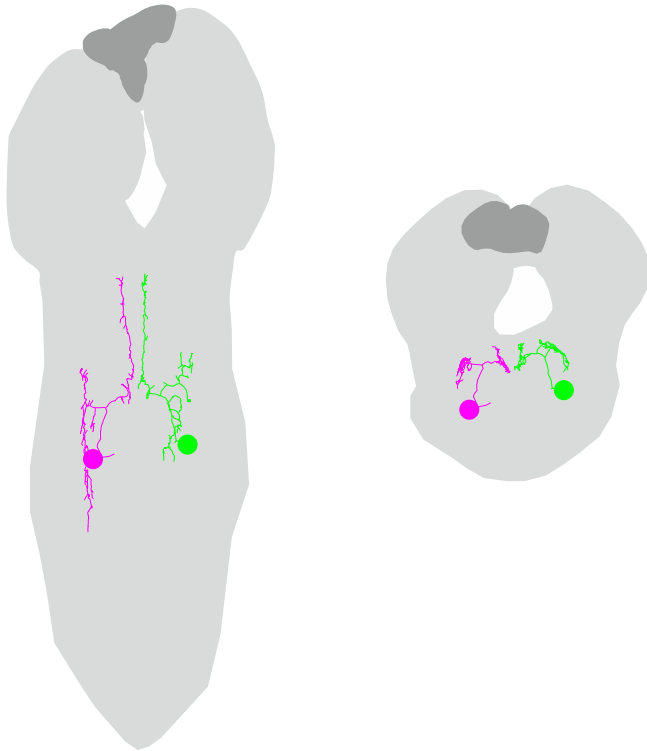

|                   | synapses to |   | synapses from |   |
|-------------------|-------------|---|---------------|---|
| hugin-PC right 1  | 0           | 0 | 0             | 0 |
| hugin-PC right 2  | 0           | 0 | 0             | 0 |
| hugin-PC right 3  | 0           | 0 | 0             | 0 |
| hugin-PC right 4  | 0           | 0 | 0             | 0 |
| hugin-PC left 1   | 0           | 0 | 0             | 0 |
| hugin-PC left 2   | 0           | 0 | 0             | 0 |
| hugin-PC left 3   | 0           | 0 | 0             | 0 |
| hugin-PC left 4   | 0           | 0 | 0             | 0 |
| hugin-RG right 1  | 0           | 0 | 0             | 0 |
| hugin-RG right 2  | 0           | 0 | 0             | 0 |
| hugin-RG left 1   | 0           | 0 | 0             | 0 |
| hugin-RG left 2   | 0           | 0 | 0             | 0 |
| hugin-VNC right 1 | 0           | 0 | 0             | 7 |
| hugin-VNC right 2 | 0           | 0 | 0             | 7 |
| hugin-VNC left 1  | 0           | 0 | 3             | 0 |
| hugin-VNC left 2  | 0           | 0 | 3             | 0 |
| hugin-PH right 1  | 0           | 0 | 0             | 0 |
| hugin-PH right 2  | 0           | 0 | 0             | 0 |
| hugin-PH left 1   | 0           | 0 | 0             | 0 |
| hugin-PH left 2   | 0           | 0 | 0             | 0 |

22.

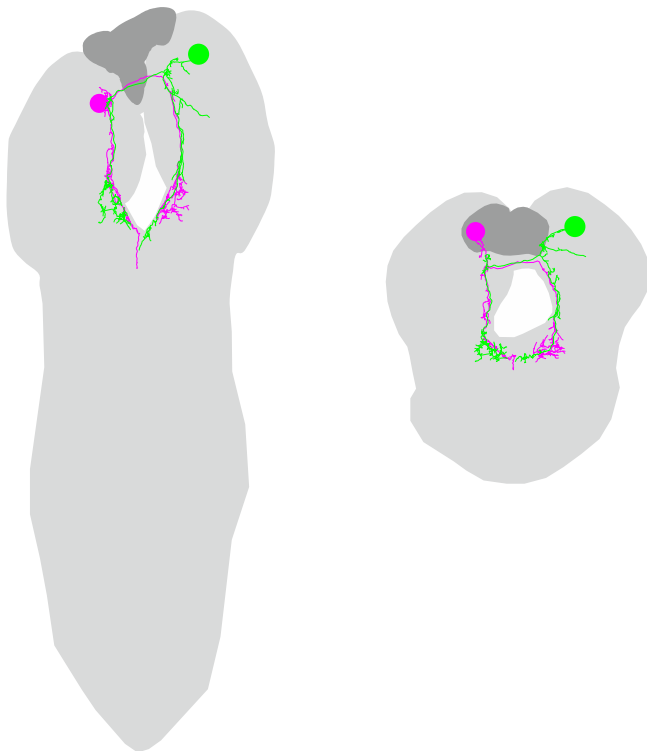

|                   | synapses to |   | synapses from |   |
|-------------------|-------------|---|---------------|---|
| hugin-PC right 1  | 0           | 0 | 0             | 2 |
| hugin-PC right 2  | 0           | 0 | 0             | 2 |
| hugin-PC right 3  | 0           | 1 | 2             | 0 |
| hugin-PC right 4  | 0           | 0 | 3             | 1 |
| hugin-PC left 1   | 0           | 0 | 0             | 2 |
| hugin-PC left 2   | 1           | 0 | 1             | 0 |
| hugin-PC left 3   | 0           | 0 | 1             | 2 |
| hugin-PC left 4   | 2           | 1 | 2             | 1 |
| hugin-RG right 1  | 0           | 0 | 0             | 0 |
| hugin-RG right 2  | 0           | 0 | 0             | 0 |
| hugin-RG left 1   | 0           | 0 | 0             | 0 |
| hugin-RG left 2   | 0           | 0 | 0             | 0 |
| hugin-VNC right 1 | 0           | 0 | 0             | 0 |
| hugin-VNC right 2 | 1           | 0 | 0             | 0 |
| hugin-VNC left 1  | 1           | 0 | 0             | 0 |
| hugin-VNC left 2  | 0           | 0 | 0             | 0 |
| hugin-PH right 1  | 0           | 0 | 0             | 0 |
| hugin-PH right 2  | 0           | 0 | 0             | 0 |
| hugin-PH left 1   | 0           | 0 | 0             | 0 |
| hugin-PH left 2   | 0           | 0 | 0             | 0 |

23.

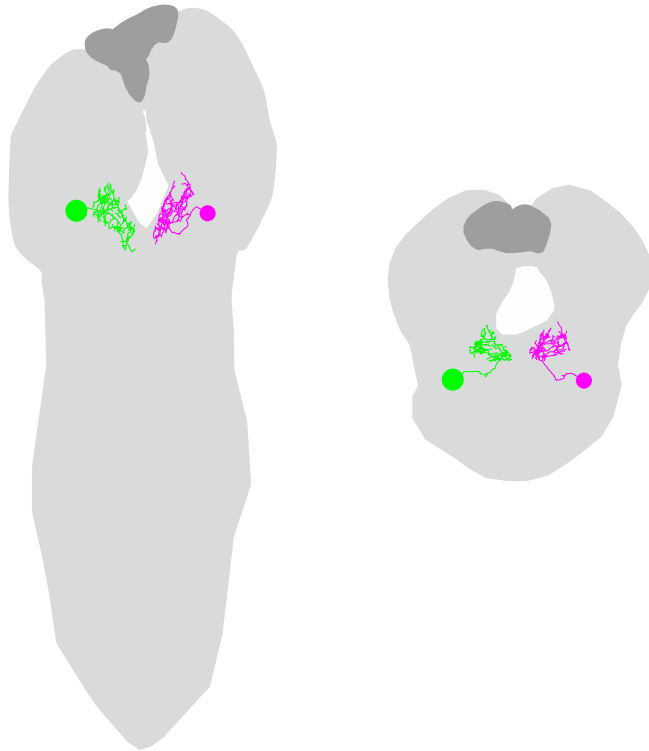

|                   | synapses to |   | synapses from |   |
|-------------------|-------------|---|---------------|---|
| hugin-PC right 1  | 0           | 0 | 0             | 2 |
| hugin-PC right 2  | 0           | 0 | 0             | 0 |
| hugin-PC right 3  | 0           | 2 | 0             | 0 |
| hugin-PC right 4  | 0           | 1 | 0             | 0 |
| hugin-PC left 1   | 1           | 0 | 1             | 0 |
| hugin-PC left 2   | 0           | 0 | 3             | 0 |
| hugin-PC left 3   | 0           | 0 | 1             | 0 |
| hugin-PC left 4   | 3           | 0 | 0             | 0 |
| hugin-RG right 1  | 0           | 0 | 0             | 0 |
| hugin-RG right 2  | 0           | 0 | 0             | 0 |
| hugin-RG left 1   | 0           | 0 | 0             | 0 |
| hugin-RG left 2   | 0           | 0 | 0             | 0 |
| hugin-VNC right 1 | 0           | 0 | 0             | 0 |
| hugin-VNC right 2 | 0           | 0 | 0             | 0 |
| hugin-VNC left 1  | 0           | 0 | 0             | 0 |
| hugin-VNC left 2  | 0           | 0 | 0             | 0 |
| hugin-PH right 1  | 0           | 0 | 0             | 0 |
| hugin-PH right 2  | 0           | 0 | 0             | 0 |
| hugin-PH left 1   | 0           | 0 | 0             | 0 |
| hugin-PH left 2   | 0           | 0 | 0             | 0 |

24.

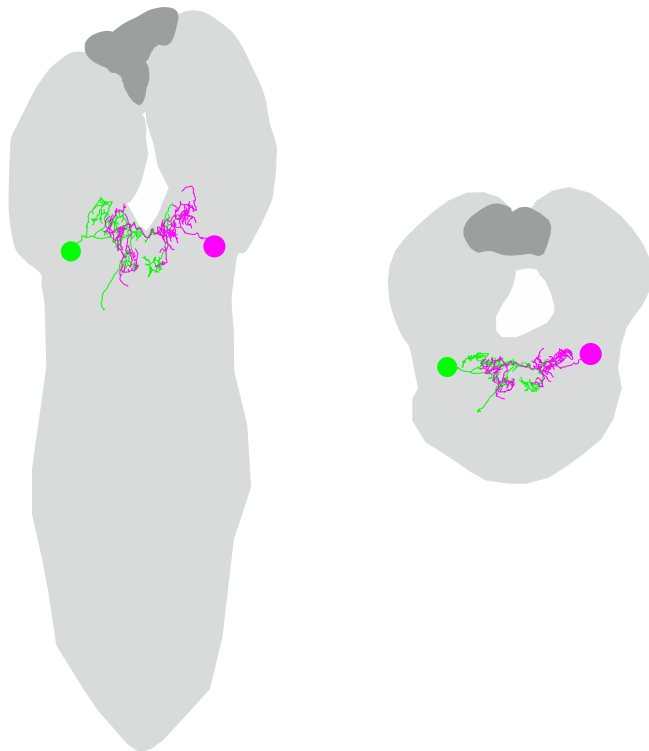

|                   | synapses to |   | synapses from |   |
|-------------------|-------------|---|---------------|---|
| hugin-PC right 1  | 0           | 0 | 0             | 0 |
| hugin-PC right 2  | 0           | 0 | 0             | 0 |
| hugin-PC right 3  | 0           | 0 | 0             | 0 |
| hugin-PC right 4  | 0           | 1 | 0             | 0 |
| hugin-PC left 1   | 0           | 0 | 0             | 0 |
| hugin-PC left 2   | 0           | 0 | 0             | 0 |
| hugin-PC left 3   | 0           | 1 | 1             | 0 |
| hugin-PC left 4   | 0           | 0 | 0             | 0 |
| hugin-RG right 1  | 0           | 0 | 0             | 0 |
| hugin-RG right 2  | 0           | 0 | 0             | 0 |
| hugin-RG left 1   | 0           | 0 | 0             | 0 |
| hugin-RG left 2   | 0           | 0 | 0             | 0 |
| hugin-VNC right 1 | 0           | 0 | 0             | 0 |
| hugin-VNC right 2 | 0           | 0 | 0             | 0 |
| hugin-VNC left 1  | 0           | 0 | 0             | 0 |
| hugin-VNC left 2  | 0           | 0 | 0             | 0 |
| hugin-PH right 1  | 3           | 0 | 0             | 0 |
| hugin-PH right 2  | 2           | 0 | 0             | 0 |
| hugin-PH left 1   | 0           | 1 | 0             | 0 |
| hugin-PH left 2   | 1           | 2 | 0             | 0 |

25.

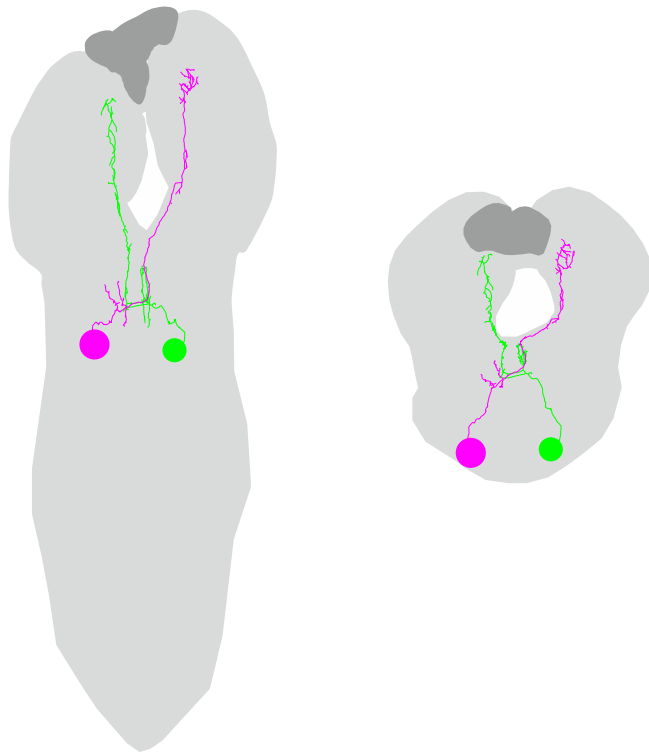

|                   | synapses to |   | synapses from |   |
|-------------------|-------------|---|---------------|---|
| hugin-PC right 1  | 0           | 0 | 0             | 0 |
| hugin-PC right 2  | 0           | 0 | 0             | 0 |
| hugin-PC right 3  | 0           | 0 | 0             | 0 |
| hugin-PC right 4  | 0           | 0 | 0             | 0 |
| hugin-PC left 1   | 0           | 0 | 0             | 0 |
| hugin-PC left 2   | 0           | 0 | 0             | 0 |
| hugin-PC left 3   | 0           | 0 | 0             | 0 |
| hugin-PC left 4   | 0           | 0 | 0             | 0 |
| hugin-RG right 1  | 0           | 0 | 0             | 0 |
| hugin-RG right 2  | 0           | 0 | 0             | 0 |
| hugin-RG left 1   | 0           | 0 | 0             | 0 |
| hugin-RG left 2   | 0           | 0 | 0             | 0 |
| hugin-VNC right 1 | 0           | 0 | 0             | 0 |
| hugin-VNC right 2 | 4           | 0 | 0             | 0 |
| hugin-VNC left 1  | 4           | 0 | 0             | 0 |
| hugin-VNC left 2  | 0           | 0 | 0             | 0 |
| hugin-PH right 1  | 0           | 0 | 0             | 0 |
| hugin-PH right 2  | 0           | 0 | 0             | 0 |
| hugin-PH left 1   | 0           | 0 | 0             | 0 |
| hugin-PH left 2   | 0           | 0 | 0             | 0 |

26.

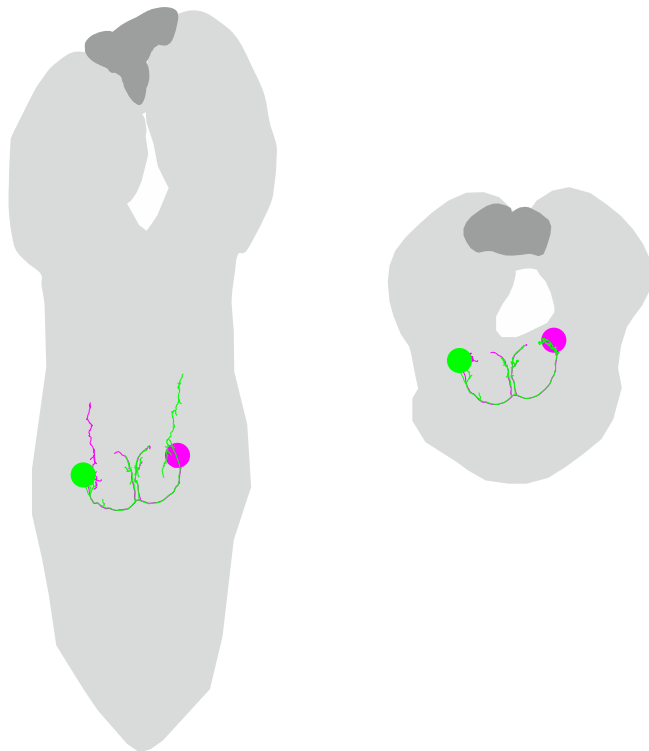

|                   | synapses to |   | synapses from |   |
|-------------------|-------------|---|---------------|---|
| hugin-PC right 1  | 0           | 0 | 0             | 0 |
| hugin-PC right 2  | 0           | 0 | 0             | 0 |
| hugin-PC right 3  | 0           | 0 | 0             | 0 |
| hugin-PC right 4  | 0           | 0 | 0             | 0 |
| hugin-PC left 1   | 0           | 0 | 0             | 0 |
| hugin-PC left 2   | 0           | 0 | 0             | 0 |
| hugin-PC left 3   | 0           | 0 | 0             | 0 |
| hugin-PC left 4   | 0           | 0 | 0             | 0 |
| hugin-RG right 1  | 0           | 0 | 0             | 0 |
| hugin-RG right 2  | 0           | 0 | 0             | 0 |
| hugin-RG left 1   | 0           | 0 | 0             | 0 |
| hugin-RG left 2   | 0           | 0 | 0             | 0 |
| hugin-VNC right 1 | 0           | 0 | 1             | 0 |
| hugin-VNC right 2 | 0           | 0 | 0             | 0 |
| hugin-VNC left 1  | 0           | 0 | 0             | 2 |
| hugin-VNC left 2  | 0           | 0 | 0             | 1 |
| hugin-PH right 1  | 0           | 0 | 0             | 0 |
| hugin-PH right 2  | 0           | 0 | 0             | 0 |
| hugin-PH left 1   | 0           | 0 | 0             | 0 |
| hugin-PH left 2   | 0           | 0 | 0             | 0 |

27.

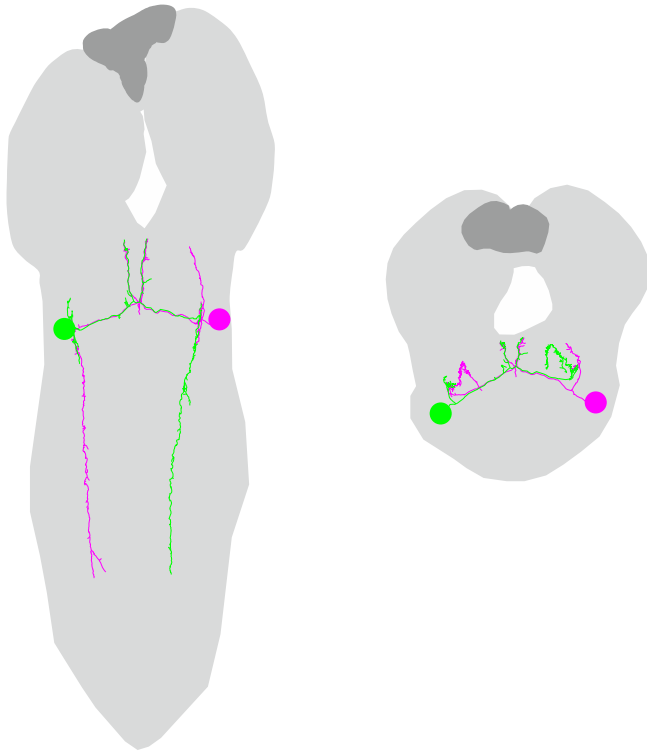

|                   | synapses to |   | synapses from |   |
|-------------------|-------------|---|---------------|---|
| hugin-PC right 1  | 0           | 0 | 0             | 0 |
| hugin-PC right 2  | 0           | 0 | 0             | 0 |
| hugin-PC right 3  | 0           | 0 | 0             | 0 |
| hugin-PC right 4  | 0           | 0 | 0             | 0 |
| hugin-PC left 1   | 0           | 0 | 0             | 0 |
| hugin-PC left 2   | 0           | 0 | 0             | 0 |
| hugin-PC left 3   | 0           | 0 | 0             | 0 |
| hugin-PC left 4   | 0           | 0 | 0             | 0 |
| hugin-RG right 1  | 0           | 0 | 0             | 0 |
| hugin-RG right 2  | 0           | 0 | 0             | 0 |
| hugin-RG left 1   | 0           | 0 | 0             | 0 |
| hugin-RG left 2   | 0           | 0 | 0             | 0 |
| hugin-VNC right 1 | 0           | 1 | 4             | 5 |
| hugin-VNC right 2 | 0           | 0 | 2             | 3 |
| hugin-VNC left 1  | 1           | 0 | 6             | 4 |
| hugin-VNC left 2  | 1           | 0 | 5             | 6 |
| hugin-PH right 1  | 0           | 0 | 0             | 0 |
| hugin-PH right 2  | 0           | 0 | 0             | 0 |
| hugin-PH left 1   | 0           | 0 | 0             | 0 |
| hugin-PH left 2   | 0           | 0 | 0             | 0 |

28.

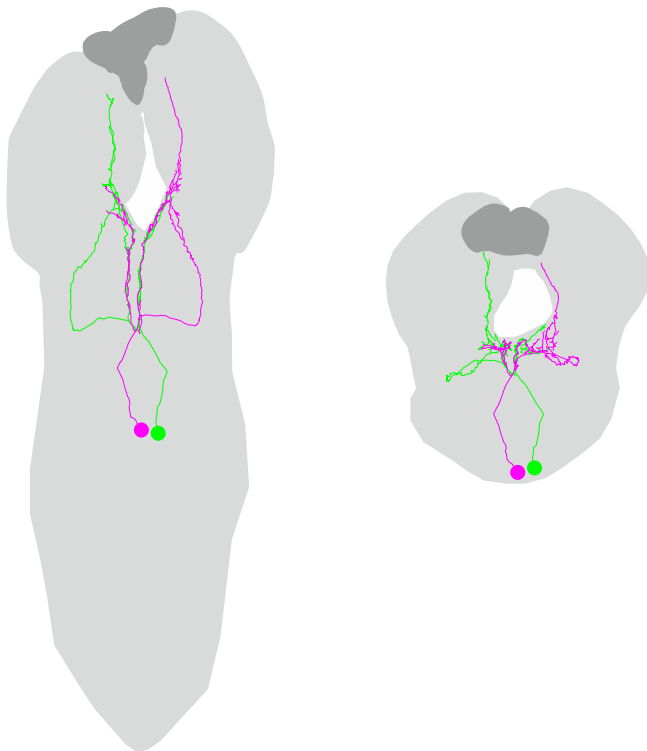

|                   | synapses to |    | synapses from |   |
|-------------------|-------------|----|---------------|---|
| hugin-PC right 1  | 0           | 10 | 0             | 2 |
| hugin-PC right 2  | 0           | 11 | 0             | 4 |
| hugin-PC right 3  | 0           | 7  | 0             | 1 |
| hugin-PC right 4  | 0           | 2  | 0             | 0 |
| hugin-PC left 1   | 6           | 0  | 2             | 1 |
| hugin-PC left 2   | 5           | 0  | 1             | 0 |
| hugin-PC left 3   | 8           | 0  | 2             | 0 |
| hugin-PC left 4   | 5           | 0  | 0             | 0 |
| hugin-RG right 1  | 0           | 0  | 0             | 0 |
| hugin-RG right 2  | 0           | 0  | 0             | 0 |
| hugin-RG left 1   | 0           | 0  | 0             | 0 |
| hugin-RG left 2   | 0           | 0  | 0             | 0 |
| hugin-VNC right 1 | 0           | 0  | 0             | 0 |
| hugin-VNC right 2 | 0           | 0  | 0             | 0 |
| hugin-VNC left 1  | 0           | 0  | 0             | 0 |
| hugin-VNC left 2  | 0           | 0  | 0             | 0 |
| hugin-PH right 1  | 0           | 0  | 0             | 0 |
| hugin-PH right 2  | 0           | 0  | 0             | 0 |
| hugin-PH left 1   | 0           | 0  | 0             | 0 |
| hugin-PH left 2   | 0           | 0  | 0             | 0 |



29.

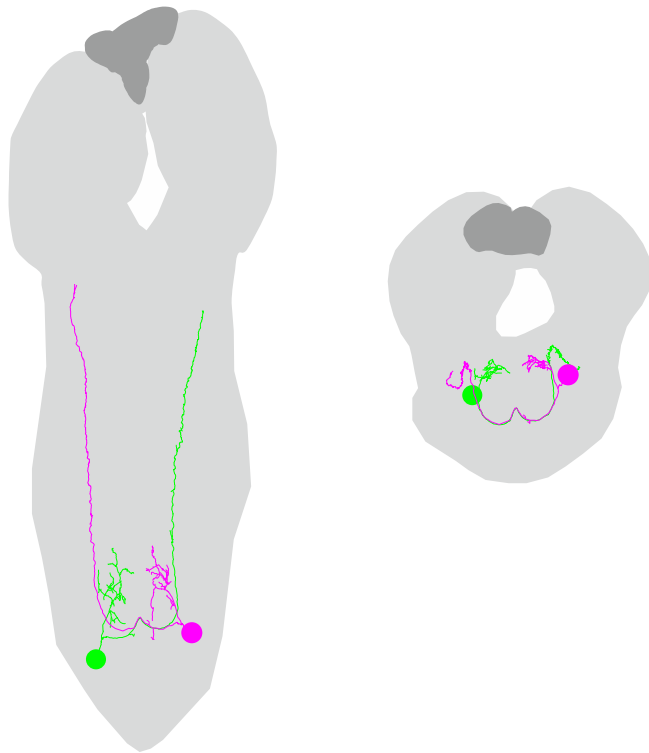

|                   | synapses to |   | synapses from |   |
|-------------------|-------------|---|---------------|---|
| hugin-PC right 1  | 0           | 0 | 0             | 0 |
| hugin-PC right 2  | 0           | 0 | 0             | 0 |
| hugin-PC right 3  | 0           | 0 | 0             | 0 |
| hugin-PC right 4  | 0           | 0 | 0             | 0 |
| hugin-PC left 1   | 0           | 0 | 0             | 0 |
| hugin-PC left 2   | 0           | 0 | 0             | 0 |
| hugin-PC left 3   | 0           | 0 | 0             | 0 |
| hugin-PC left 4   | 0           | 0 | 0             | 0 |
| hugin-RG right 1  | 0           | 0 | 0             | 0 |
| hugin-RG right 2  | 0           | 0 | 0             | 0 |
| hugin-RG left 1   | 0           | 0 | 0             | 0 |
| hugin-RG left 2   | 0           | 0 | 0             | 0 |
| hugin-VNC right 1 | 0           | 1 | 0             | 3 |
| hugin-VNC right 2 | 0           | 4 | 0             | 0 |
| hugin-VNC left 1  | 6           | 0 | 1             | 0 |
| hugin-VNC left 2  | 1           | 0 | 1             | 0 |
| hugin-PH right 1  | 0           | 0 | 0             | 0 |
| hugin-PH right 2  | 0           | 0 | 0             | 0 |
| hugin-PH left 1   | 0           | 0 | 0             | 0 |
| hugin-PH left 2   | 0           | 0 | 0             | 0 |

30.

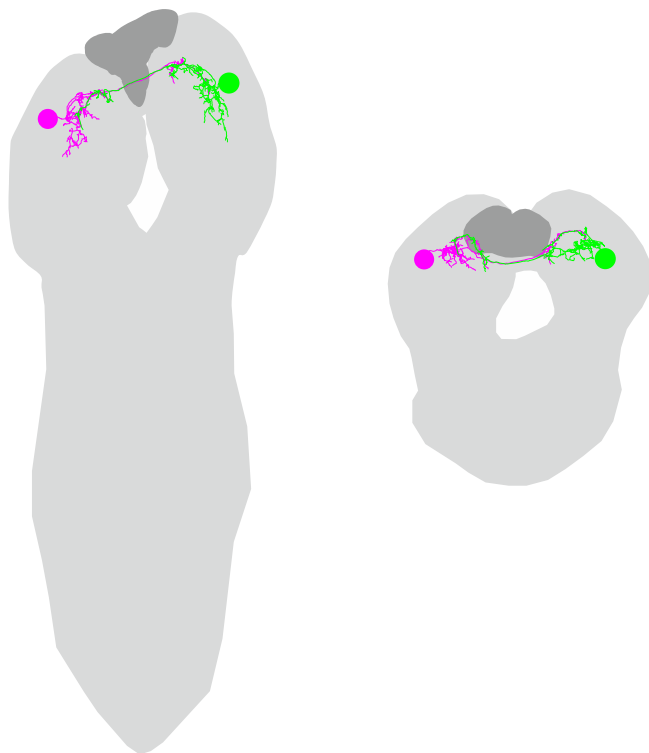

|                   | synapses to |    | synapses from |   |
|-------------------|-------------|----|---------------|---|
| hugin-PC right 1  | 9           | 10 | 1             | 0 |
| hugin-PC right 2  | 3           | 5  | 0             | 1 |
| hugin-PC right 3  | 5           | 2  | 0             | 0 |
| hugin-PC right 4  | 11          | 7  | 2             | 3 |
| hugin-PC left 1   | 11          | 5  | 1             | 3 |
| hugin-PC left 2   | 6           | 7  | 1             | 2 |
| hugin-PC left 3   | 2           | 0  | 0             | 2 |
| hugin-PC left 4   | 6           | 6  | 0             | 0 |
| hugin-RG right 1  | 0           | 0  | 0             | 0 |
| hugin-RG right 2  | 0           | 0  | 0             | 0 |
| hugin-RG left 1   | 0           | 0  | 0             | 0 |
| hugin-RG left 2   | 0           | 0  | 0             | 0 |
| hugin-VNC right 1 | 0           | 0  | 0             | 0 |
| hugin-VNC right 2 | 0           | 0  | 0             | 0 |
| hugin-VNC left 1  | 0           | 0  | 0             | 0 |
| hugin-VNC left 2  | 0           | 0  | 0             | 0 |
| hugin-PH right 1  | 0           | 0  | 0             | 0 |
| hugin-PH right 2  | 0           | 0  | 0             | 0 |
| hugin-PH left 1   | 0           | 0  | 0             | 0 |
| hugin-PH left 2   | 0           | 0  | 0             | 0 |

31.

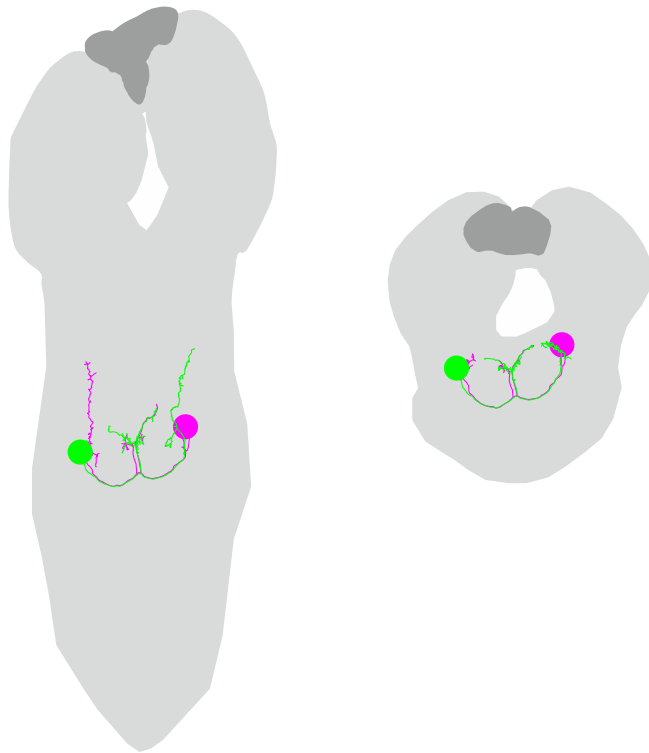

|                   | synapses to |   | synapses from |   |
|-------------------|-------------|---|---------------|---|
| hugin-PC right 1  | 0           | 0 | 0             | 0 |
| hugin-PC right 2  | 0           | 0 | 0             | 0 |
| hugin-PC right 3  | 0           | 0 | 0             | 0 |
| hugin-PC right 4  | 0           | 0 | 0             | 0 |
| hugin-PC left 1   | 0           | 0 | 0             | 0 |
| hugin-PC left 2   | 0           | 0 | 0             | 0 |
| hugin-PC left 3   | 0           | 0 | 0             | 0 |
| hugin-PC left 4   | 0           | 0 | 0             | 0 |
| hugin-RG right 1  | 0           | 0 | 0             | 0 |
| hugin-RG right 2  | 0           | 0 | 0             | 0 |
| hugin-RG left 1   | 0           | 0 | 0             | 0 |
| hugin-RG left 2   | 0           | 0 | 0             | 0 |
| hugin-VNC right 1 | 0           | 0 | 1             | 0 |
| hugin-VNC right 2 | 0           | 0 | 1             | 0 |
| hugin-VNC left 1  | 0           | 0 | 0             | 3 |
| hugin-VNC left 2  | 0           | 0 | 0             | 1 |
| hugin-PH right 1  | 0           | 0 | 0             | 0 |
| hugin-PH right 2  | 0           | 0 | 0             | 0 |
| hugin-PH left 1   | 0           | 0 | 0             | 0 |
| hugin-PH left 2   | 0           | 0 | 0             | 0 |

32.

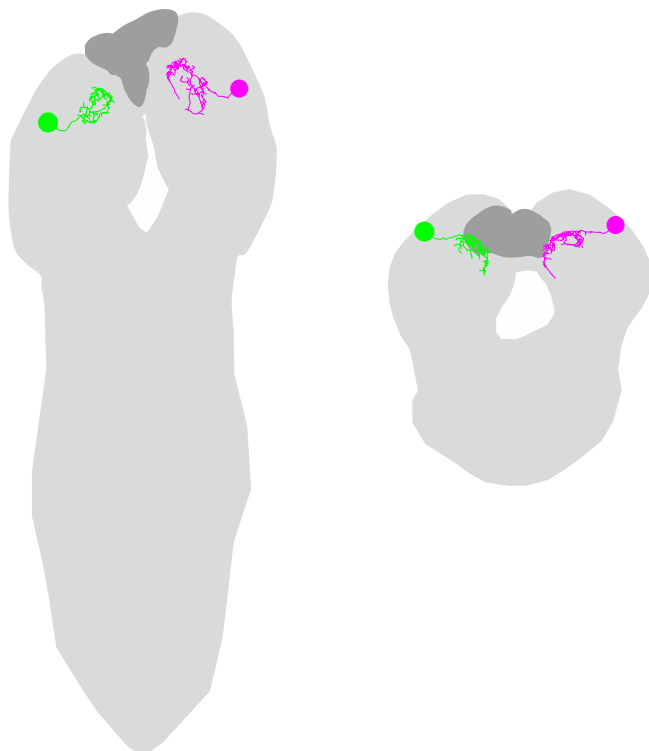

|                   | synapses to |   | synapses from |   |
|-------------------|-------------|---|---------------|---|
| hugin-PC right 1  | 0           | 5 | 0             | 1 |
| hugin-PC right 2  | 0           | 2 | 0             | 0 |
| hugin-PC right 3  | 0           | 1 | 0             | 0 |
| hugin-PC right 4  | 0           | 1 | 0             | 1 |
| hugin-PC left 1   | 9           | 0 | 0             | 0 |
| hugin-PC left 2   | 7           | 0 | 3             | 0 |
| hugin-PC left 3   | 3           | 0 | 0             | 0 |
| hugin-PC left 4   | 5           | 0 | 0             | 0 |
| hugin-RG right 1  | 0           | 0 | 0             | 0 |
| hugin-RG right 2  | 0           | 0 | 0             | 0 |
| hugin-RG left 1   | 0           | 0 | 0             | 0 |
| hugin-RG left 2   | 0           | 0 | 0             | 0 |
| hugin-VNC right 1 | 0           | 0 | 0             | 0 |
| hugin-VNC right 2 | 0           | 0 | 0             | 0 |
| hugin-VNC left 1  | 0           | 0 | 0             | 0 |
| hugin-VNC left 2  | 0           | 0 | 0             | 0 |
| hugin-PH right 1  | 0           | 0 | 0             | 0 |
| hugin-PH right 2  | 0           | 0 | 0             | 0 |
| hugin-PH left 1   | 0           | 0 | 0             | 0 |
| hugin-PH left 2   | 0           | 0 | 0             | 0 |

33.

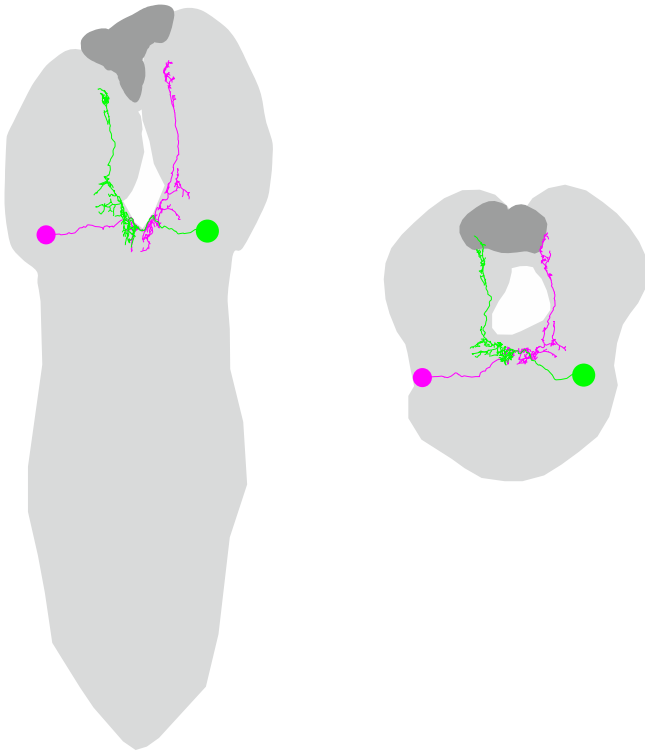

|                   | synapses to |   | synapses from |   |
|-------------------|-------------|---|---------------|---|
| hugin-PC right 1  | 0           | 0 | 0             | 0 |
| hugin-PC right 2  | 0           | 0 | 0             | 1 |
| hugin-PC right 3  | 0           | 1 | 0             | 1 |
| hugin-PC right 4  | 0           | 0 | 0             | 2 |
| hugin-PC left 1   | 2           | 0 | 0             | 0 |
| hugin-PC left 2   | 0           | 0 | 2             | 0 |
| hugin-PC left 3   | 2           | 0 | 4             | 0 |
| hugin-PC left 4   | 0           | 0 | 1             | 1 |
| hugin-RG right 1  | 0           | 0 | 0             | 0 |
| hugin-RG right 2  | 0           | 0 | 0             | 0 |
| hugin-RG left 1   | 0           | 0 | 0             | 0 |
| hugin-RG left 2   | 0           | 0 | 0             | 0 |
| hugin-VNC right 1 | 0           | 2 | 0             | 0 |
| hugin-VNC right 2 | 1           | 0 | 0             | 0 |
| hugin-VNC left 1  | 3           | 0 | 1             | 0 |
| hugin-VNC left 2  | 0           | 2 | 0             | 0 |
| hugin-PH right 1  | 0           | 0 | 0             | 0 |
| hugin-PH right 2  | 0           | 0 | 0             | 0 |
| hugin-PH left 1   | 0           | 0 | 0             | 0 |
| hugin-PH left 2   | 0           | 0 | 0             | 0 |

34.

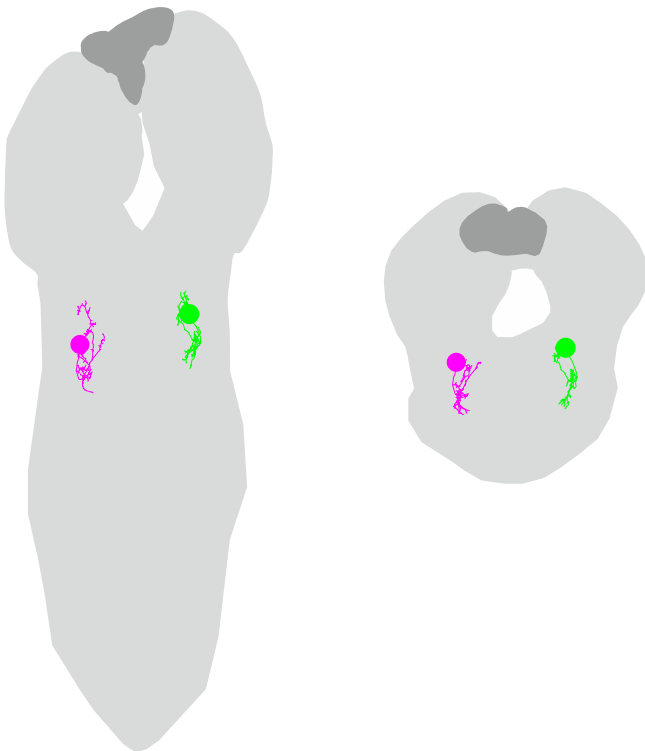

|                   | synapses to |   | synapses from |   |
|-------------------|-------------|---|---------------|---|
| hugin-PC right 1  | 0           | 0 | 0             | 0 |
| hugin-PC right 2  | 0           | 0 | 0             | 0 |
| hugin-PC right 3  | 0           | 0 | 0             | 0 |
| hugin-PC right 4  | 0           | 0 | 0             | 0 |
| hugin-PC left 1   | 0           | 0 | 0             | 0 |
| hugin-PC left 2   | 0           | 0 | 0             | 0 |
| hugin-PC left 3   | 0           | 0 | 0             | 0 |
| hugin-PC left 4   | 0           | 0 | 0             | 0 |
| hugin-RG right 1  | 0           | 0 | 0             | 0 |
| hugin-RG right 2  | 0           | 0 | 0             | 0 |
| hugin-RG left 1   | 0           | 0 | 0             | 0 |
| hugin-RG left 2   | 0           | 0 | 0             | 0 |
| hugin-VNC right 1 | 0           | 0 | 0             | 4 |
| hugin-VNC right 2 | 0           | 0 | 0             | 2 |
| hugin-VNC left 1  | 0           | 0 | 4             | 0 |
| hugin-VNC left 2  | 0           | 0 | 3             | 0 |
| hugin-PH right 1  | 0           | 0 | 0             | 0 |
| hugin-PH right 2  | 0           | 0 | 0             | 0 |
| hugin-PH left 1   | 0           | 0 | 0             | 0 |
| hugin-PH left 2   | 0           | 0 | 0             | 0 |

35.

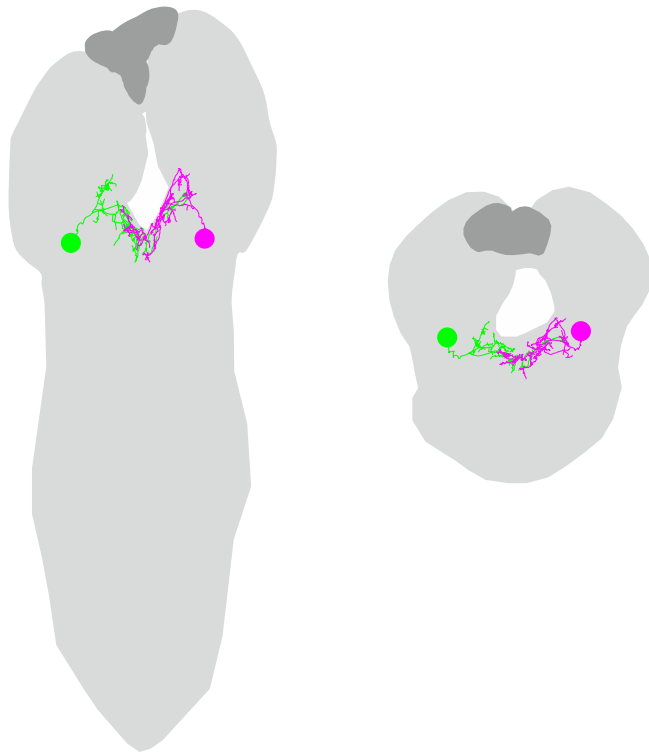

|                   | synapses to |   | synapses from |   |
|-------------------|-------------|---|---------------|---|
| hugin-PC right 1  | 0           | 3 | 0             | 0 |
| hugin-PC right 2  | 0           | 0 | 0             | 0 |
| hugin-PC right 3  | 4           | 0 | 0             | 0 |
| hugin-PC right 4  | 2           | 3 | 1             | 3 |
| hugin-PC left 1   | 2           | 2 | 3             | 1 |
| hugin-PC left 2   | 2           | 4 | 0             | 0 |
| hugin-PC left 3   | 0           | 0 | 0             | 2 |
| hugin-PC left 4   | 0           | 2 | 0             | 0 |
| hugin-RG right 1  | 0           | 0 | 0             | 0 |
| hugin-RG right 2  | 0           | 0 | 0             | 0 |
| hugin-RG left 1   | 0           | 0 | 0             | 0 |
| hugin-RG left 2   | 0           | 0 | 0             | 0 |
| hugin-VNC right 1 | 0           | 0 | 0             | 0 |
| hugin-VNC right 2 | 0           | 0 | 0             | 0 |
| hugin-VNC left 1  | 0           | 0 | 0             | 0 |
| hugin-VNC left 2  | 0           | 0 | 0             | 0 |
| hugin-PH right 1  | 0           | 0 | 0             | 0 |
| hugin-PH right 2  | 0           | 0 | 0             | 0 |
| hugin-PH left 1   | 0           | 0 | 0             | 0 |
| hugin-PH left 2   | 0           | 0 | 0             | 0 |

36.

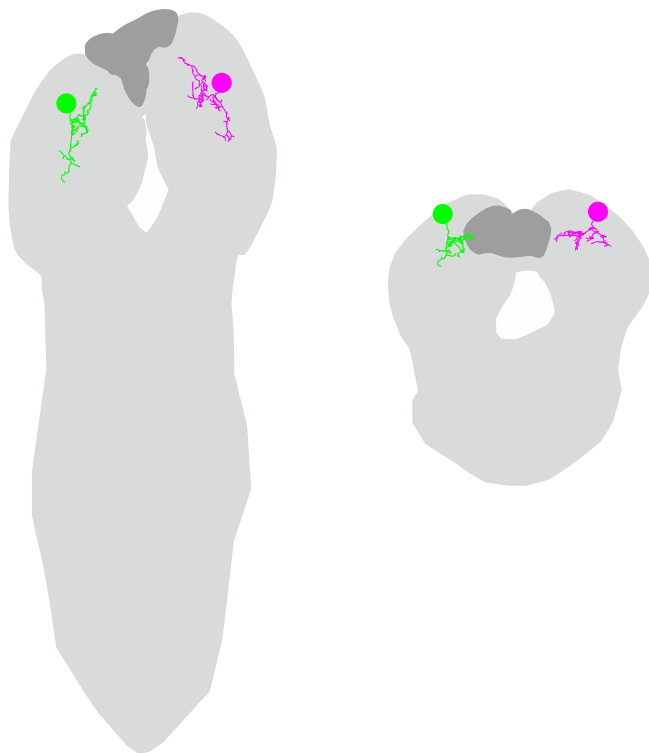

|                   | synapses to |   | synapses from |   |
|-------------------|-------------|---|---------------|---|
| hugin-PC right 1  | 0           | 1 | 0             | 0 |
| hugin-PC right 2  | 0           | 2 | 0             | 0 |
| hugin-PC right 3  | 0           | 0 | 0             | 0 |
| hugin-PC right 4  | 0           | 1 | 0             | 2 |
| hugin-PC left 1   | 2           | 0 | 1             | 0 |
| hugin-PC left 2   | 4           | 0 | 2             | 0 |
| hugin-PC left 3   | 0           | 0 | 0             | 0 |
| hugin-PC left 4   | 3           | 0 | 4             | 0 |
| hugin-RG right 1  | 0           | 0 | 0             | 0 |
| hugin-RG right 2  | 0           | 0 | 0             | 0 |
| hugin-RG left 1   | 0           | 0 | 0             | 0 |
| hugin-RG left 2   | 0           | 0 | 0             | 0 |
| hugin-VNC right 1 | 0           | 0 | 0             | 0 |
| hugin-VNC right 2 | 0           | 0 | 0             | 0 |
| hugin-VNC left 1  | 0           | 0 | 0             | 0 |
| hugin-VNC left 2  | 0           | 0 | 0             | 0 |
| hugin-PH right 1  | 0           | 0 | 0             | 0 |
| hugin-PH right 2  | 0           | 0 | 0             | 0 |
| hugin-PH left 1   | 0           | 0 | 0             | 0 |
| hugin-PH left 2   | 0           | 0 | 0             | 0 |

37.

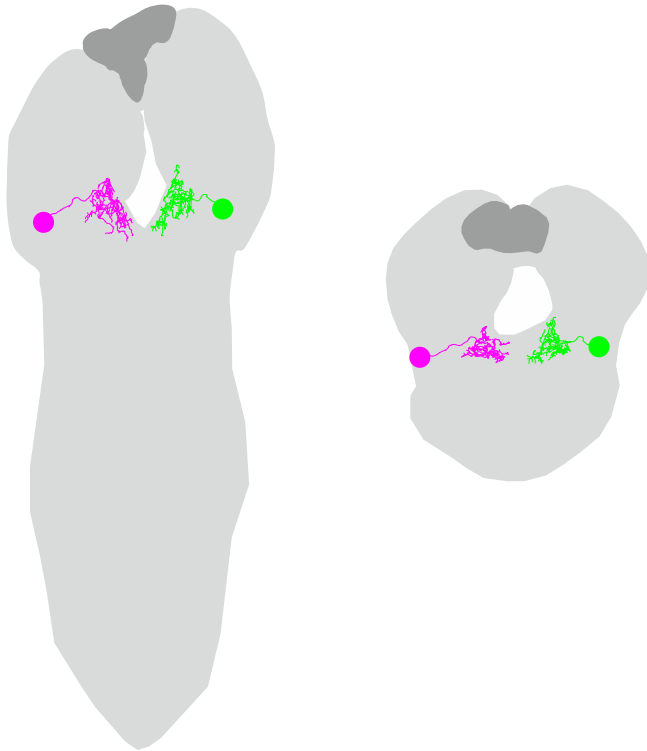

|                   | synapses to |   | synapses from |   |
|-------------------|-------------|---|---------------|---|
| hugin-PC right 1  | 1           | 0 | 0             | 0 |
| hugin-PC right 2  | 0           | 0 | 0             | 0 |
| hugin-PC right 3  | 2           | 0 | 3             | 0 |
| hugin-PC right 4  | 0           | 0 | 2             | 0 |
| hugin-PC left 1   | 0           | 0 | 0             | 2 |
| hugin-PC left 2   | 0           | 0 | 0             | 1 |
| hugin-PC left 3   | 0           | 0 | 0             | 0 |
| hugin-PC left 4   | 0           | 0 | 0             | 1 |
| hugin-RG right 1  | 0           | 0 | 0             | 0 |
| hugin-RG right 2  | 0           | 0 | 0             | 0 |
| hugin-RG left 1   | 0           | 0 | 0             | 0 |
| hugin-RG left 2   | 0           | 0 | 0             | 0 |
| hugin-VNC right 1 | 0           | 0 | 0             | 0 |
| hugin-VNC right 2 | 0           | 1 | 0             | 0 |
| hugin-VNC left 1  | 0           | 0 | 0             | 0 |
| hugin-VNC left 2  | 0           | 0 | 0             | 0 |
| hugin-PH right 1  | 0           | 0 | 0             | 0 |
| hugin-PH right 2  | 0           | 0 | 0             | 0 |
| hugin-PH left 1   | 0           | 0 | 0             | 0 |
| hugin-PH left 2   | 0           | 0 | 0             | 0 |

38.

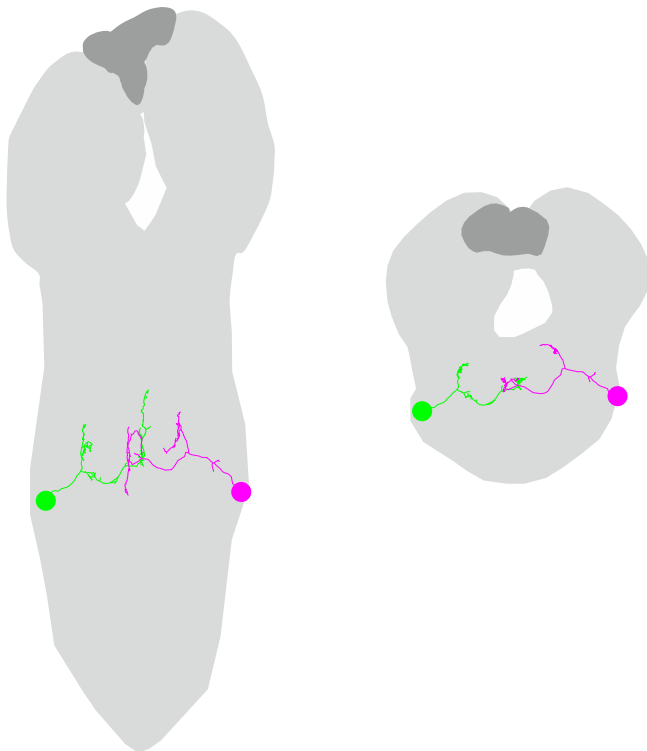

|                   | synapses to |   | synapses from |   |
|-------------------|-------------|---|---------------|---|
| hugin-PC right 1  | 0           | 0 | 0             | 0 |
| hugin-PC right 2  | 0           | 0 | 0             | 0 |
| hugin-PC right 3  | 0           | 0 | 0             | 0 |
| hugin-PC right 4  | 0           | 0 | 0             | 0 |
| hugin-PC left 1   | 0           | 0 | 0             | 0 |
| hugin-PC left 2   | 0           | 0 | 0             | 0 |
| hugin-PC left 3   | 0           | 0 | 0             | 0 |
| hugin-PC left 4   | 0           | 0 | 0             | 0 |
| hugin-RG right 1  | 0           | 0 | 0             | 0 |
| hugin-RG right 2  | 0           | 0 | 0             | 0 |
| hugin-RG left 1   | 0           | 0 | 0             | 0 |
| hugin-RG left 2   | 0           | 0 | 0             | 0 |
| hugin-VNC right 1 | 0           | 0 | 5             | 0 |
| hugin-VNC right 2 | 0           | 0 | 1             | 0 |
| hugin-VNC left 1  | 0           | 0 | 0             | 6 |
| hugin-VNC left 2  | 0           | 0 | 0             | 4 |
| hugin-PH right 1  | 0           | 0 | 0             | 0 |
| hugin-PH right 2  | 0           | 0 | 0             | 0 |
| hugin-PH left 1   | 0           | 0 | 0             | 0 |
| hugin-PH left 2   | 0           | 0 | 0             | 0 |

39.

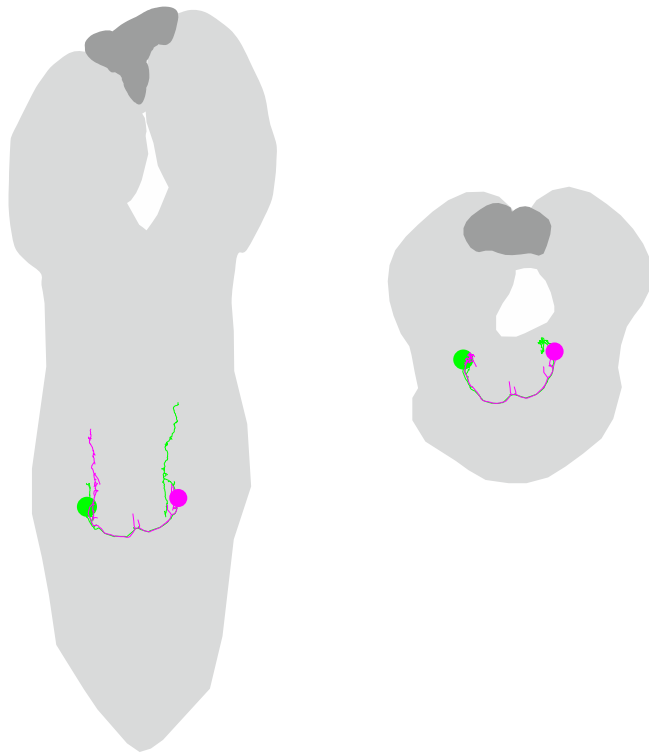

|                   | synapses to |   | synapses from |   |
|-------------------|-------------|---|---------------|---|
| hugin-PC right 1  | 0           | 0 | 0             | 0 |
| hugin-PC right 2  | 0           | 0 | 0             | 0 |
| hugin-PC right 3  | 0           | 0 | 0             | 0 |
| hugin-PC right 4  | 0           | 0 | 0             | 0 |
| hugin-PC left 1   | 0           | 0 | 0             | 0 |
| hugin-PC left 2   | 0           | 0 | 0             | 0 |
| hugin-PC left 3   | 0           | 0 | 0             | 0 |
| hugin-PC left 4   | 0           | 0 | 0             | 0 |
| hugin-RG right 1  | 0           | 0 | 0             | 0 |
| hugin-RG right 2  | 0           | 0 | 0             | 0 |
| hugin-RG left 1   | 0           | 0 | 0             | 0 |
| hugin-RG left 2   | 0           | 0 | 0             | 0 |
| hugin-VNC right 1 | 0           | 0 | 7             | 0 |
| hugin-VNC right 2 | 0           | 0 | 0             | 0 |
| hugin-VNC left 1  | 0           | 0 | 0             | 2 |
| hugin-VNC left 2  | 0           | 0 | 0             | 1 |
| hugin-PH right 1  | 0           | 0 | 0             | 0 |
| hugin-PH right 2  | 0           | 0 | 0             | 0 |
| hugin-PH left 1   | 0           | 0 | 0             | 0 |
| hugin-PH left 2   | 0           | 0 | 0             | 0 |

40.

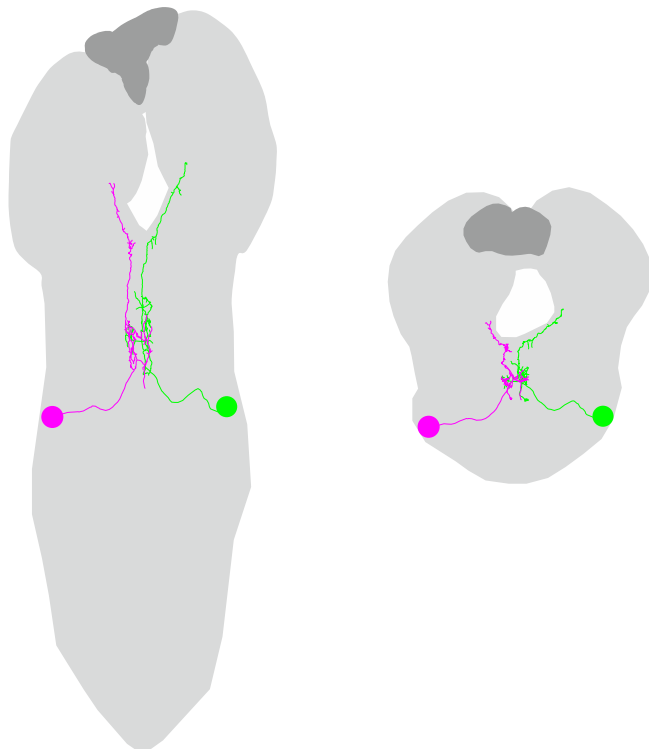

|                   | synapses to |    | synapses from |   |
|-------------------|-------------|----|---------------|---|
| hugin-PC right 1  | 0           | 0  | 0             | 0 |
| hugin-PC right 2  | 0           | 0  | 0             | 0 |
| hugin-PC right 3  | 0           | 0  | 0             | 0 |
| hugin-PC right 4  | 0           | 0  | 0             | 0 |
| hugin-PC left 1   | 0           | 0  | 0             | 0 |
| hugin-PC left 2   | 0           | 0  | 0             | 0 |
| hugin-PC left 3   | 0           | 1  | 0             | 0 |
| hugin-PC left 4   | 0           | 0  | 0             | 0 |
| hugin-RG right 1  | 12          | 4  | 0             | 0 |
| hugin-RG right 2  | 15          | 6  | 0             | 0 |
| hugin-RG left 1   | 6           | 9  | 0             | 0 |
| hugin-RG left 2   | 6           | 14 | 0             | 0 |
| hugin-VNC right 1 | 0           | 0  | 0             | 0 |
| hugin-VNC right 2 | 0           | 1  | 0             | 0 |
| hugin-VNC left 1  | 0           | 0  | 0             | 0 |
| hugin-VNC left 2  | 0           | 0  | 0             | 0 |
| hugin-PH right 1  | 0           | 1  | 0             | 0 |
| hugin-PH right 2  | 0           | 1  | 0             | 0 |
| hugin-PH left 1   | 0           | 0  | 0             | 0 |
| hugin-PH left 2   | 0           | 0  | 0             | 0 |

41.

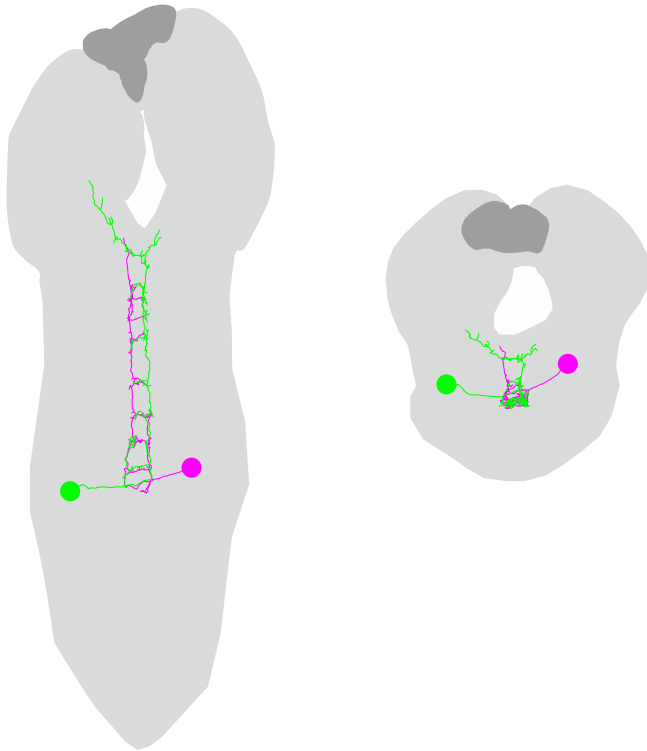

|                   | synapses to |   | synapses from |   |
|-------------------|-------------|---|---------------|---|
| hugin-PC right 1  | 0           | 0 | 0             | 0 |
| hugin-PC right 2  | 0           | 0 | 0             | 0 |
| hugin-PC right 3  | 0           | 0 | 0             | 0 |
| hugin-PC right 4  | 0           | 0 | 0             | 0 |
| hugin-PC left 1   | 0           | 0 | 0             | 0 |
| hugin-PC left 2   | 0           | 0 | 0             | 0 |
| hugin-PC left 3   | 0           | 0 | 0             | 0 |
| hugin-PC left 4   | 0           | 0 | 0             | 0 |
| hugin-RG right 1  | 0           | 0 | 0             | 0 |
| hugin-RG right 2  | 0           | 0 | 0             | 0 |
| hugin-RG left 1   | 0           | 0 | 0             | 0 |
| hugin-RG left 2   | 0           | 0 | 0             | 0 |
| hugin-VNC right 1 | 0           | 0 | 0             | 0 |
| hugin-VNC right 2 | 0           | 0 | 0             | 0 |
| hugin-VNC left 1  | 0           | 0 | 0             | 0 |
| hugin-VNC left 2  | 0           | 0 | 0             | 0 |
| hugin-PH right 1  | 3           | 0 | 0             | 0 |
| hugin-PH right 2  | 0           | 0 | 0             | 0 |
| hugin-PH left 1   | 2           | 0 | 0             | 0 |
| hugin-PH left 2   | 0           | 2 | 0             | 0 |

42.

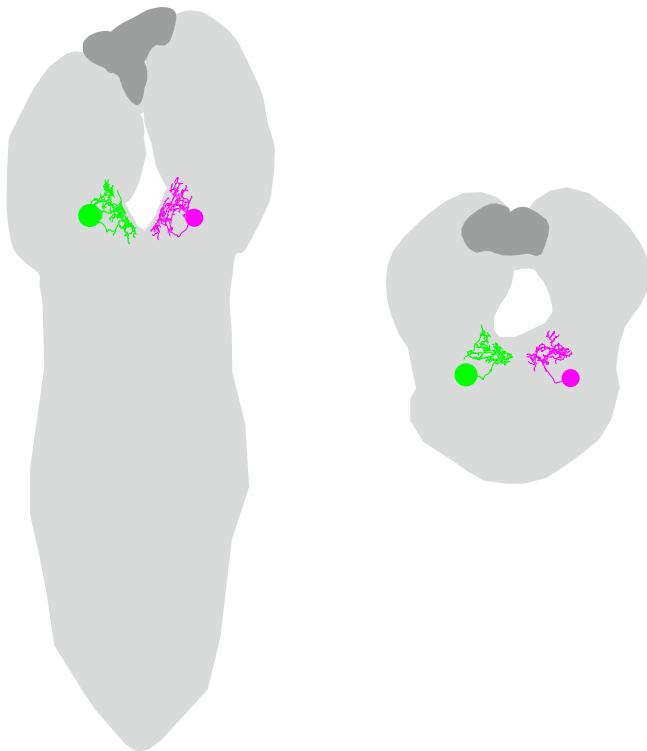

|                   | synapses to |   | synapses from |   |
|-------------------|-------------|---|---------------|---|
| hugin-PC right 1  | 0           | 0 | 0             | 0 |
| hugin-PC right 2  | 0           | 2 | 0             | 0 |
| hugin-PC right 3  | 0           | 1 | 0             | 0 |
| hugin-PC right 4  | 0           | 0 | 0             | 0 |
| hugin-PC left 1   | 5           | 0 | 2             | 0 |
| hugin-PC left 2   | 1           | 0 | 1             | 0 |
| hugin-PC left 3   | 0           | 0 | 1             | 0 |
| hugin-PC left 4   | 1           | 0 | 1             | 0 |
| hugin-RG right 1  | 0           | 0 | 0             | 0 |
| hugin-RG right 2  | 0           | 0 | 0             | 0 |
| hugin-RG left 1   | 0           | 0 | 0             | 0 |
| hugin-RG left 2   | 0           | 0 | 0             | 0 |
| hugin-VNC right 1 | 0           | 0 | 0             | 0 |
| hugin-VNC right 2 | 0           | 0 | 0             | 0 |
| hugin-VNC left 1  | 0           | 0 | 0             | 0 |
| hugin-VNC left 2  | 0           | 0 | 0             | 0 |
| hugin-PH right 1  | 0           | 0 | 0             | 0 |
| hugin-PH right 2  | 0           | 0 | 0             | 0 |
| hugin-PH left 1   | 0           | 0 | 0             | 0 |
| hugin-PH left 2   | 0           | 0 | 0             | 0 |

43.

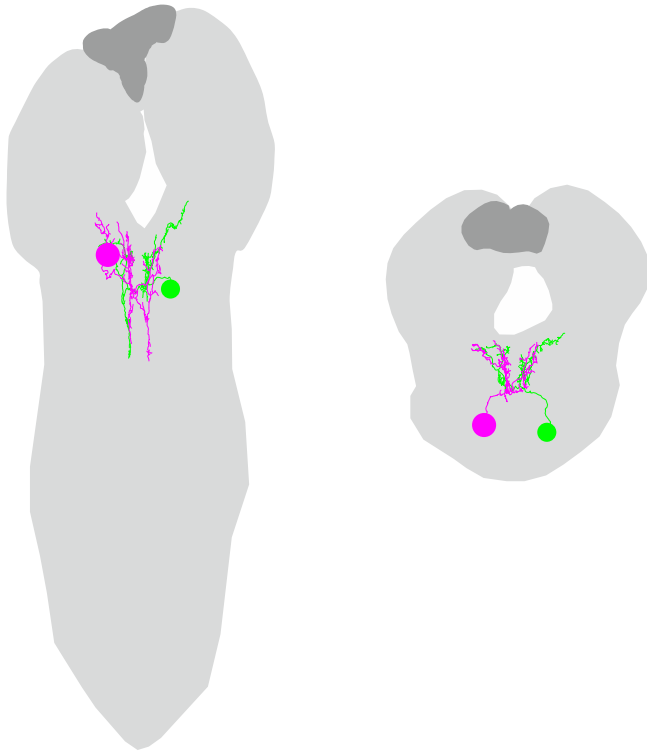

|                   | synapses to |   | synapses from |   |
|-------------------|-------------|---|---------------|---|
| hugin-PC right 1  | 0           | 0 | 0             | 0 |
| hugin-PC right 2  | 0           | 0 | 0             | 0 |
| hugin-PC right 3  | 0           | 0 | 0             | 0 |
| hugin-PC right 4  | 0           | 0 | 0             | 0 |
| hugin-PC left 1   | 0           | 0 | 0             | 0 |
| hugin-PC left 2   | 0           | 0 | 0             | 0 |
| hugin-PC left 3   | 0           | 0 | 0             | 0 |
| hugin-PC left 4   | 0           | 0 | 0             | 0 |
| hugin-RG right 1  | 0           | 0 | 0             | 0 |
| hugin-RG right 2  | 0           | 0 | 0             | 0 |
| hugin-RG left 1   | 0           | 0 | 0             | 0 |
| hugin-RG left 2   | 0           | 0 | 0             | 0 |
| hugin-VNC right 1 | 0           | 0 | 0             | 0 |
| hugin-VNC right 2 | 0           | 0 | 0             | 0 |
| hugin-VNC left 1  | 0           | 0 | 0             | 0 |
| hugin-VNC left 2  | 0           | 0 | 0             | 0 |
| hugin-PH right 1  | 10          | 0 | 0             | 0 |
| hugin-PH right 2  | 7           | 4 | 0             | 0 |
| hugin-PH left 1   | 3           | 3 | 0             | 0 |
| hugin-PH left 2   | 3           | 4 | 0             | 0 |



## K Unpaired medial interneurons

1.

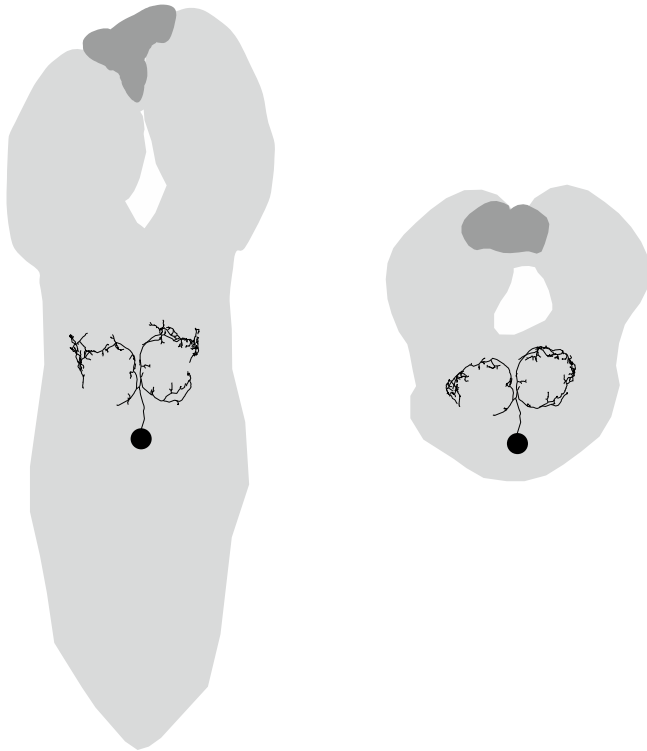

synapses to

synapses from

|                   |   |   |
|-------------------|---|---|
| hugin-PC right 1  | 0 | 0 |
| hugin-PC right 2  | 0 | 0 |
| hugin-PC right 3  | 0 | 0 |
| hugin-PC right 4  | 0 | 0 |
| hugin-PC left 1   | 0 | 0 |
| hugin-PC left 2   | 0 | 0 |
| hugin-PC left 3   | 0 | 0 |
| hugin-PC left 4   | 0 | 0 |
| hugin-RG right 1  | 0 | 0 |
| hugin-RG right 2  | 0 | 0 |
| hugin-RG left 1   | 0 | 0 |
| hugin-RG left 2   | 0 | 0 |
| hugin-VNC right 1 | 0 | 5 |
| hugin-VNC right 2 | 0 | 4 |
| hugin-VNC left 1  | 0 | 2 |
| hugin-VNC left 2  | 0 | 3 |
| hugin-PH right 1  | 0 | 0 |
| hugin-PH right 2  | 0 | 0 |
| hugin-PH left 1   | 0 | 0 |
| hugin-PH left 2   | 0 | 0 |

2.

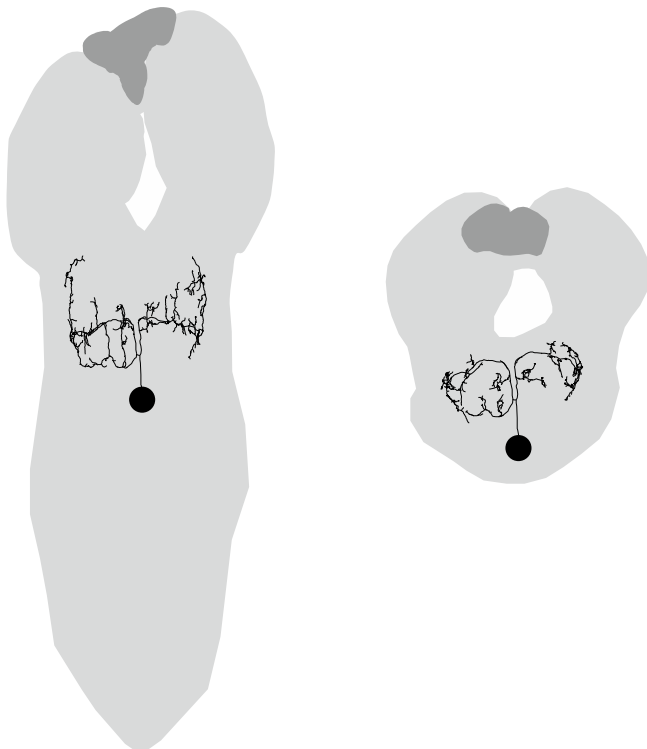

synapses to

synapses from

|                   |   |   |
|-------------------|---|---|
| hugin-PC right 1  | 0 | 0 |
| hugin-PC right 2  | 0 | 0 |
| hugin-PC right 3  | 0 | 0 |
| hugin-PC right 4  | 0 | 0 |
| hugin-PC left 1   | 0 | 0 |
| hugin-PC left 2   | 0 | 0 |
| hugin-PC left 3   | 0 | 0 |
| hugin-PC left 4   | 0 | 0 |
| hugin-RG right 1  | 0 | 0 |
| hugin-RG right 2  | 0 | 0 |
| hugin-RG left 1   | 0 | 0 |
| hugin-RG left 2   | 0 | 0 |
| hugin-VNC right 1 | 0 | 4 |
| hugin-VNC right 2 | 0 | 3 |
| hugin-VNC left 1  | 0 | 2 |
| hugin-VNC left 2  | 0 | 3 |
| hugin-PH right 1  | 0 | 0 |
| hugin-PH right 2  | 0 | 0 |
| hugin-PH left 1   | 0 | 0 |
| hugin-PH left 2   | 0 | 0 |
